# Supplementary material for: Genomic and functional insights into the AP2 transcription factor family reveal a key orchestrator of drought adaptation in cultivated sugarcane
Source: Research Square preprint supplement (doi:10.21203/rs.3.rs-8306373/v1), 2025-12-26
Supplement: Supplementary file 1 [file 26dd2da83fc823842fc9ebea.xlsx]

## Sheet: Sheet1
Table S5. Protein sequences of the AP2 family members from Arabidopsis and O. sativa
Gene ID	Protein Sequence
AT1G16060.1	MFIAVEVSPVMEDITRQSKKTSVENETGDDQSATSVVLKAKRKRRSQPRDAPPQRSSVHRGVTRHRWTGRYEAHLWDKNSWNETQTKKGRQVYLGAYDEEDAAARAYDLAALKYWGRDTILNFPLCNYEEDIKEMESQSKEEYIGSLRRKSSGFSRGVSKYRGVAKHHHNGRWEARIGRVFGNKYLYLGTYATQEEAAIAYDIAAIEYRGLNAVTNFDISRYLKLPVPENPIDTANNLLESPHSDLSPFIKPNHESDLSQSQSSSEDNDDRKTKLLKSSPLVAEEVIGPSTPPEIAPPRRSFPEDIQTYFGCQNSGKLTAEEDDVIFGDLDSFLTPDFYSELNDC
AT1G51190.1	MNSNNWLAFPLSPTHSSLPPHIHSSQNSHFNLGLVNDNIDNPFQNQGWNMINPHGGGGEGGEVPKVADFLGVSKSGDHHTDHNLVPYNDIHQTNASDYYFQTNSLLPTVVTCASNAPNNYELQESAHNLQSLTLSMGSTGAAAAEVATVKASPAETSADNSSSTTNTSGGAIVEATPRRTLETFGQRTSIYRGVTRHRWTGRYEAHLWDNSCRREGQSRKGRQVYLGGYDKEEKAARAYDLAALKYWGPSTTTNFPITNYEKEVEEMKNMTRQEFVASIRRKSSGFSRGASMYRGVTRHHQHGRWQARIGRVAGNKDLYLGTFSTEEEAAEAYDIAAIKFRGLNAVTNFEINRYDVKAILESNTLPIGGGAAKRLKEAQALESSRKREEMIALGSNFHQ…
AT1G72570.1	MKKWLGFSLTPPLRICNSEEEELRHDGSDVWRYDINFDHHHHDEDVPKVEDLLSNSHQTEYPINHNQTNVNCTTVVNRLNPPGYLLHDQTVVTPHYPNLDPNLSNDYGGFERVGSVSVFKSWLEQGTPAFPLSSHYVTEEAGTSNNISHFSNEETGYNTNGSMLSLALSHGACSDLINESNVSARVEEPVKVDEKRKRLVVKPQVKESVPRKSVDSYGQRTSQYRGVTRHRWTGRYEAHLWDNSCKKEGQTRRGRQVYLGGYDEEEKAARAYDLAALKYWGPTTHLNFPLSNYEKEIEELNNMNRQEFVAMLRRNSSGFSRGASVYRGVTRHHQHGRWQARIGRVAGNKDLYLGTFSTQEEAAEAYDIAAIKFRGLNAVTNFDINRYDVKRICSSSTIV…
AT1G79700.1	MAKVSGRSKKTIVDDEISDKTASASESASIALTSKRKRKSPPRNAPLQRSSPYRGVTRHRWTGRYEAHLWDKNSWNDTQTKKGRQVYLGAYDEEEAAARAYDLAALKYWGRDTLLNFPLPSYDEDVKEMEGQSKEEYIGSLRRKSSGFSRGVSKYRGVARHHHNGRWEARIGRVFATQEEAAIAYDIAAIEYRGLNAVTNFDVSRYLNPNAAADKADSDSKPIRSPSREPESSDDNKSPKSEEVIEPSTSPEVIPTRRSFPDDIQTYFGCQDSGKLATEEDVIFDCFNSYINPGFYNEFDYGP
AT2G28550.1	MLDLNLNADSPESTQYGGDSYLDRQTSDNSAGNRVEESGTSTSSVINADGDEDSCSTRAFTLSFDILKVGSSSGGDESPAASASVTKEFFPVSGDCGHLRDVEGSSSSRNWIDLSFDRIGDGETKLVTPVPTPAPVPAQVKKSRRGPRSRSSQYRGVTFYRRTGRWESHIWDCGKQVYLGGFDTAHAAARAYDRAAIKFRGVDADINFTLGDYEEDMKQVQNLSKEEFVHILRRQSTGFSRGSSKYRGVTLHKCGRWEARMGQFLGKKAYDKAAINTNGREAVTNFEMSSYQNEINSESNNSEIDLNLGISLSTGNAPKQNGRLFHFPSNTYETQRGVSLRIDNEYMGKPVNTPLPYGSSDHRLYWNGACPSYNNPAEGRATEKRSEAEGMMSNWGWQR…
AT3G20840.1	MNSNNWLGFPLSPNNSSLPPHEYNLGLVSDHMDNPFQTQEWNMINPHGGGGDEGGEVPKVADFLGVSKPDENQSNHLVAYNDSDYYFHTNSLMPSVQSNDVVVAACDSNTPNNSSYHELQESAHNLQSLTLSMGTTAGNNVVDKASPSETTGDNASGGALAVVETATPRRALDTFGQRTSIYRGVTRHRWTGRYEAHLWDNSCRREGQSRKGRQVYLGGYDKEDKAARSYDLAALKYWGPSTTTNFPITNYEKEVEEMKHMTRQEFVAAIRRKSSGFSRGASMYRGVTRHHQHGRWQARIGRVAGNKDLYLGTFSTEEEAAEAYDIAAIKFRGLNAVTNFEINRYDVKAILESSTLPIGGGAAKRLKEAQALESSRKREAEMIALGSSFQYGGGSSTGS…
AT3G54320.1	MKKRLTTSTCSSSPSSSVSSSTTTSSPIQSEAPRPKRAKRAKKSSPSGDKSHNPTSPASTRRSSIYRGVTRHRWTGRFEAHLWDKSSWNSIQNKKGKQVYLGAYDSEEAAAHTYDLAALKYWGPDTILNFPAETYTKELEEMQRVTKEEYLASLRRQSSGFSRGVSKYRGVARHHHNGRWEARIGRVFGNKYLYLGTYNTQEEAAAAYDMAAIEYRGANAVTNFDISNYIDRLKKKGVFPFPVNQANHQEGILVEAKQEVETREAKEEPREEVKQQYVEEPPQEEEEKEEEKAEQQEAEIVGYSEEAAVVNCCIDSSTIMEMDRCGDNNELAWNFCMMDTGFSPFLTDQNLANENPIEYPELFNELAFEDNIDFMFDDGKHECLNLENLDCCVVGRESP…
AT4G36920.1	MWDLNDAPHQTQREEESEEFCYSSPSKRVGSFSNSSSSAVVIEDGSDDDELNRVRPNNPLVTHQFFPEMDSNGGGVASGFPRAHWFGVKFCQSDLATGSSAGKATNVAAAVVEPAQPLKKSRRGPRSRSSQYRGVTFYRRTGRWESHIWDCGKQVYLGGFDTAHAAARAYDRAAIKFRGVEADINFNIDDYDDDLKQMTNLTKEEFVHVLRRQSTGFPRGSSKYRGVTLHKCGRWEARMGQFLGKKYVYLGLFDTEVEAARAYDKAAIKCNGKDAVTNFDPSIYDEELNAESSGNPTTPQDHNLDLSLGNSANSKHKSQDMRLRMNQQQQDSLHSNEVLGLGQTGMLNHTPNSNHQFPGSSNIGSGGGFSLFPAAENHRFDGRASTNQVLTNAAASSGF…
AT4G37750.1	MKSFCDNDDNNHSNTTNLLGFSLSSNMMKMGGRGGREAIYSSSTSSAATSSSSVPPQLVVGDNTSNFGVCYGSNPNGGIYSHMSVMPLRSDGSLCLMEALNRSSHSNHHQDSSPKVEDFFGTHHNNTSHKEAMDLSLDSLFYNTTHEPNTTTNFQEFFSFPQTRNHEEETRNYGNDPSLTHGGSFNVGVYGEFQQSLSLSMSPGSQSSCITGSHHHQQNQNQNHQSQNHQQISEALVETSVGFETTTMAAAKKKRGQEDVVVVGQKQIVHRKSIDTFGQRTSQYRGVTRHRWTGRYEAHLWDNSFKKEGHSRKGRQVYLGGYDMEEKAARAYDLAALKYWGPSTHTNFSAENYQKEIEDMKNMTRQEYVAHLRRKSSGFSRGASIYRGVTRHHQHGRWQ…
AT5G10510.1	MEMLRSSDQSQFVSYDASSAASSSPYLLDNFYGWSNQKPQEFFKEEAQLAAAASMADSTILTTFVDPQSHHSQNHIPKLEDFLGDSSSIVRYSDNSQTDTQDSSLTQIYDPRHHHNQTGFYSDHHDFKTMAGFQSAFSTNSGSEVDDSASIGRTHLAGDYLGHVVESSGPELGFHGGSTGALSLGVNVNNNTNHRNDNDNHYRGNNNGERINNNNNNDNEKTDSEKEKAVVAVETSDCSNKKIADTFGQRTSIYRGVTRHRWTGRYEAHLWDNSCRREGQARKGRQVYLGGYDKEDKAARAYDLAALKYWNATATTNFPITNYSKEVEEMKHMTKQEFIASLRRKSSGFSRGASIYRGVTRHHQQGRWQARIGRVAGNKDLYLGTFATEEEAAEAYDIA…
AT5G17430.1	MNSMNNWLGFSLSPHDQNHHRTDVDSSTTRTAVDVAGGYCFDLAAPSDESSAVQTSFLSPFGVTLEAFTRDNNSHSRDWDINGGACNNINNNEQNGPKLENFLGRTTTIYNTNETVVDGNGDCGGGDGGGGGSLGLSMIKTWLSNHSVANANHQDNGNGARGLSLSMNSSTSDSNNYNNNDDVVQEKTIVDVVETTPKKTIESFGQRTSIYRGVTRHRWTGRYEAHLWDNSCKREGQTRKGRQVYLGGYDKEEKAARAYDLAALKYWGTTTTTNFPLSEYEKEVEEMKHMTRQEYVASLRRKSSGFSRGASIYRGVTRHHQHGRWQARIGRVAGNKDLYLGTFGTQEEAAEAYDIAAIKFRGLSAVTNFDMNRYNVKAILESPSLPIGSSAKRLKDVNN…
AT5G57390.1	MKNNNNKSSSSSSYDSSLSPSSSSSSHQNWLSFSLSNNNNNFNSSSNPNLTSSTSDHHHPHPSHLSLFQAFSTSPVERQDGSPGVSPSDATAVLSVYPGGPKLENFLGGGASTTTTRPMQQVQSLGGVVFSSDLQPPLHPPSAAEIYDSELKSIAASFLGNYSGGHSSEVSSVHKQQPNPLAVSEASPTPKKNVESFGQRTSIYRGVTRHRWTGRYEAHLWDNSCRREGQSRKGRQVYLGGYDKEDKAARAYDLAALKYWGPTTTTNFPISNYESELEEMKHMTRQEFVASLRRKSSGFSRGASMYRGVTRHHQHGRWQARIGRVAGNKDLYLGTFSTQEEAAEAYDIAAIKFRGLNAVTNFDISRYDVKSIASCNLPVGGLMPKPSPATAAADKTVDL…
AT5G65510.1	MAPPMTNCLTFSLSPMEMLKSTDQSHFSSSYDDSSTPYLIDNFYAFKEEAEIEAAAASMADSTTLSTFFDHSQTQIPKLEDFLGDSFVRYSDNQTETQDSSSLTPFYDPRHRTVAEGVTGFFSDHHQPDFKTINSGPEIFDDSTTSNIGGTHLSSHVVESSTTAKLGFNGDCTTTGGVLSLGVNNTSDQPLSCNNGERGGNSNKKKTVSKKETSDDSKKKIVETLGQRTSIYRGVTRHRWTGRYEAHLWDNSCRREGQARKGRQVYLGGYDKEDRAARAYDLAALKYWGSTATTNFPVSSYSKELEEMNHMTKQEFIASLRRKSSGFSRGASIYRGVTRHHQQGRWQARIGRVAGNKDLYLGTFATEEEAAEAYDIAAIKFRGINAVTNFEMNRYDIEA…
AT5G67180.1	MWNLNDSPDHHEESDSRGNPVGHVSNGMSQSATWLPFVLPVTRNFFPAQSMEPGVRWSGFNSVGKSDPSGSGRPEEPEISPPIKKSRRGPRSRSSQYRGVTFYRRTGRWESHIWDCGKQVYLGGFDTAHAAARAYDRAAIKFRGVDADINFDIEDYLDDLKQMGNLTKEEFMHVLRRQSTGFPRGSSKYRGVTLHKCGRWESRLGQFLNKKYVYLGLFDTEIEAARAYDKAAIKCNGKDAVTNFDPKVYEEEEDLSSETTRNGHNLGLSLGESSSEEFRLKSDIASIRSRIRDEERLLGSDLSLAMMTTTVRSEKQQSDGGGNRVVGMAASSGFSPQPSPYRIPRTFHFSRP
LOC_Os01g59780.1	MQRMTREEYLATLRRKSSGFSRGVSKYRGVAKHHHNGRWEARIGRAVGKKYLYLGTFDTQEEAATAYDLAAIQLRGRSAVTNFDASCYTYTDHLPPPPPPQPPSVCKTEPELEPPQPAAPPGSESLLRPKMEPCDDWEPPAICPSLRDADDADHAIAEILPALCMDRADFEARYPARRARDAAADGWSTSSDDVAAASVDDDVLRSLPDDVGFVDDVESLFLDAPGPAAAAAAAAMPDDVERAVQRAPSAASRRANAAAVSYAISSLASGRWWY*
LOC_Os01g67410.1	MATMNNWLAFSLSPQDQLPPSQTNSTLISAAATTTTAGDSSTGDVCFNIPQDWSMRGSELSALVAEPKLEDFLGGISFSEQQHHHGGKGGVIPSSAAACYASSGSSVGYLYPPPSSSSLQFADSVMVATSSPVVAHDGVSGGGMVSAAAAAAASGNGGIGLSMIKNWLRSQPAPQPAQALSLSMNMAGTTTAQGGGAMALLAGAGERGRTTPASESLSTSAHGATTATMAGGRKEINEEGSGSAGAVVAVGSESGGSGAVVEAGAAAAAARKSVDTFGQRTSIYRGVTRHRWTGRYEAHLWDNSCRREGQTRKGRQVLIGGYDKEEKAARAYDLAALKYWGPTTTTNFPVNNYEKELEEMKHMTRQEFVASLRRKSSGFSRGASIYRGVTRHHQHGRWQ…
LOC_Os02g40070.1	MASANNWLGFSLSGQENPQPHQDSSPPAAIDVSGAGDFYGLPTSQPTAADAHLGVAGHHHNASYGIMEAFNRGAQEAQDWNMRGLDYNGGASELSMLVGSSGGKRAAAVEETEPKLEDFLGGNSFVSEQDHHAAGGFLFSGVPMASSTNSNSGSNTMELSMIKTWLRNNGQVPAGHQPQQQQPAAAAAAAQQQAHEAAEMSTDASASSFGCSSDAMGRSNNGGAVSAAAGGTSSQSLALSMSTGSHSHLPIVVAGGGNASGGAAESTSSENKRASGAMDSPGGGAIEAVPRKSIDTFGQRTSIYRGVTRHRWTGRYEAHLWDNSCRREGQSRKGRQGGYDKEDKAARAYDLAALKYWGTTTTTNFPISNYEKELDEMKHMTRQEYIAYLRRNSSGFSRG…
LOC_Os02g51300.1	MESSLKEEKAAGESGDDEKAERSSPINLNSLPATAACAATAPDEDGLHSAVESGAKDSNTTKGVESLGTGHKKIPKREVVDEVDVQTCAEGKNDSVVPSSSKNPINDKNAKANVAENGQSADGIPEDQRVTILSVVKKDEPADDVRDSVNPVTVVGYRDEKGGTSGTAGTTAVRPAGTRSSSFHGVTRHRWSGKYEAHLWDSSCRMEGRRRKGRQVPTMQEVMIPRKKLPGHMMLQLLNTGAKIQS*
LOC_Os03g07940.1	MRHRQAAQASCRTTDHLRRSKTISSCLPMASTSWAHRTQWRRRRCTTPAAAAAASSTDPCRSPASSRGSGRQCTCRNGQRRRCRSPCRPLPRARRRCRRRRCRWSASPLRRSGRGRHSSVASPDIDGLEDTRLTCGTTLAGRKARPGKEGKFEGGYDKEEKAARAYDLAALKYWGPTTHINFPLSTYEKELEEMKHMTRQEFIAHLRRNSSGFSRGASMYRGVTRHHQHGRWQARIGRVAGNKDLYLGTFSTQEEAAEAYDIAAIKFRGLNAVTNFDISKYDVKRICSSTHLIGGDLACRRSPTRMLPPDAPAGAAGVDVVVAPGDHQQISAGGGGASDNSDTASDGHRGAHLLHGLQYAHAMKFEAGESSGGGGGDGATTNWMAAAAAAARPVAGIPT…
LOC_Os03g12950.1	MASGGGSSNWLGFSLSPHMPAMEVPSSSEPSTAAHHHHHHHPPAAAAAAGAMSSPPDSATTCNFLFSPPAAQMVAPSPGYYYVGGAYGDGTSTAGVYYSHLPVMPIKSDGSLCIMEGMMPSSSPKLEDFLGCGNGSGHDPATYYSQGQEAEDASRAAYQHHQLVPYNYQPLTEAEMLQEAAAAPMEDAMAAAKNFLVTSYGACYGNQEMPQPLSLSMSPGSQSSSCVSAAPQQHQQMAVVAAAAAAGDGQGSNSNDGGEQRVGKKRGTGKGGQKQPVHRKSIDTFGQRTSQYRGVTRHRWTGRYEAHLWDNSCKKDGQTRKGRQVR*
LOC_Os03g19900.1	MSPPTNGAISLAFPPMGPLPADALIYPFDGLSYDDFVLPVAAAPQHPLPVAVADPAPLLLLPPPSSCTCNGASSGMGAVAPRTLALGATTDGSVMTPTSWGSDGGGGGSSSARAVRSPSPVLPLVQGTGQRTSCYRGVTRHRWTGRYEAHLWDNTCRREGQKRKGRQVTTPVELFLLSVLVDWHLATNFCTLLDTLAELHSAVVPFFFLRKDYQWFHDSDTMTCCFFAFSGYDIEDKAARAYDLAALKYWGANATTNFPKESYVKEIEEMQKMSKQELVASLRRKSSGFSRGASIYRGVTRHHQHGRWQARIGRVAGNKDLYLGTFATEEEAAEAYDVAALKFRGANAVTNFEPSRYNLEAISQSDLPISVSGRRHNSSSNSNNPAPEAGGQITLMSSP…
LOC_Os03g56050.1	MASGNSSSSSGSMAATAGGVGGWLGFSLSPHMATYCAGGVDDVGHHHHHHVHQHQQQHGGGLFYNPAAVASSFYYGGGHDAVVTSAAGGGSYYGAGFSSMPLKSDGSLCIMEALRGGDQEQQGVVVSASPKLEDFLGAGPAMALSLDNSAFYYGGHGHHQGHAQDGGAVGGDPHHGGGGFLQCAVIPGAGAGHDAALVHDQSAAAVAAGWAAMHGGGYDIANAAADDVCAAGPIIPTGGHLHPLTLSMSSAGSQSSCVTVQAAAAGEPYMAMDAVSKKRGGADRAGQKQPVHRKSIDTFGQRTSQYRGVTRHRWTGRYEAHLWDNSCKKEGQTRKGRQGGYDMEEKAARAYDLAALKYWGPSTHINFPLEDYQEELEEMKNMSRQEYVAHLRRKSSGFS…
LOC_Os03g60430.2	MLLDLNVESPERSGTSSSSVLNSGDAGGGGGGGGGGGLFRFDLLASSPDDDECSGEQHQLPAASGIVTRQLLPPPPPAAPSPAPAWQPPRRAAEDAALAQRPVVAKKTRRGPRSRSSQYRGVTFYRRTGRWESHIWDCGKQVYLGGFDTAHAAARAYDRAAIKFRGLEADINFNLSDYEDDLKQMRNWTKEEFVHILRRQSTGFARGSSKFRGVTLHKCGRWEARMGQLLGKKYIYLGLFDTEVEAARAYDRAAIRFNGREAVTNFEPASYNVDALPDAGNEAIVDGDLDLDLRISQPNARDSKSDVATTGLQLTCDSPESSNITVHQPMGSSPQWTVHHQSTPLPPQHQRLYPSHCLGFLPNLQERPMDRRPELGPMPFPTQAWQMQAPSHLPLLHAA…
LOC_Os03g60430.1	MLLDLNVESPERSGTSSSSVLNSGDAGGGGGGGGGGGLFRFDLLASSPDDDECSGEQHQLPAASGIVTRQLLPPPPPAAPSPAPAWQPPRRAAEDAALAQRPVVAKKTRRGPRSRSSQYRGVTFYRRTGRWESHIWDCGKQVYLGGFDTAHAAARAYDRAAIKFRGLEADINFNLSDYEDDLKQMRNWTKEEFVHILRRQSTGFARGSSKFRGVTLHKCGRWEARMGQLLGKKYIYLGLFDTEVEAARAAIRFNGREAVTNFEPASYNVDALPDAGNEAIVDGDLDLDLRISQPNARDSKSDVATTGLQLTCDSPESSNITVHQPMGSSPQWTVHHQSTPLPPQHQRLYPSHCLGFLPNLQERPMDRRPELGPMPFPTQAWQMQAPSHLPLLHAAASSG…
LOC_Os04g42570.1	MASADNWLGFSLSGQGNPQHHQNGSPSAAGDAAIDISGSGDFYGLPTPDAHHIGMAGEDAPYGVMDAFNRGTHETQDWAMRGLDYGGGSSDLSMLVGSSGGGRRTVAGDGVGEAPKLENFLDGNSFSDVHGQAAGGYLYSGSAVGGAGGYSNGGCGGGTIELSMIKTWLRSNQSQQQPSPPQHADQGMSTDASASSYACSDVLVGSCGGGGAGGTASSHGQGLALSMSTGSVAAAGGGGAVVAAESSSSENKRVDSPGGAVDGAVPRKSIDTFGQRTSIYRGVTRHRWTGRYEAHLWDNSCRREGQSRKGRQVCVGGYDKEDKAARAYDLAALKYWGTTTTTNFPMSNYEKELEEMKHMTRQEYIAHLRRNSSGFSRGASKYRGVTRHHQHGRWQARIG…
LOC_Os04g55560.2	MWDLNDSPAAEAAPPPLSPSADDSGASSSSAAAVVEIPDDADDDSAAVVVVTRQFFPPAVPGGGGDPAPGNARAGWLRLAGAAPPVAATGPAASAAVSKKSRRGPRSRSSQYRGVTFYRRTGRWESHIWDCGKQVYLGGFDTAHAAARAYDRAAIKFRGVEADINFSLEDYEDDLKQMSNLTKEEFVHVLRRQSTGFPRGSSKYRGVTLHKCGRWEARMGQFLGKKYVYLGLFDTEEEAARAYDRAAIKCNGKDAVTNFDPSIYAGEFEPPAAATGDAAEHNLDLSLGSSAGSKRGNVDGGGDDEITGGGGGGAGSDQRVPMAFDLDWQTAAARSTKAKFDQNSNHPQMPPVLQVTHLPFSPRHHHQFLSNGDPGTAGGLSLTIGAGMAGHWPPQQQQG…
LOC_Os04g55560.3	MWDLNDSPAAEAAPPPLSPSADDSGASSSSAAAVVEIPDDADDDSAAVVVVTRQFFPPAVPGGGGDPAPGNARAGWLRLAGAAPPVAATGPAASAAVSKKSRRGPRSRSSQYRGVTFYRRTGRWESHIWDCGKQVYLGGFDTAHAAARAYDRAAIKFRGVEADINFSLEDYEDDLKQMSNLTKEEFVHVLRRQSTGFPRGSSKYRGVTLHKCGRWEARMGQFLGKKYVYLGLFDTEEEAARAYDRAAIKCNGKDAVTNFDPSIYAGEFEPPAATGDAAEHNLDLSLGSSAGSKRGNVDGGGDDEITGGGGGGAGSDQRVPMAFDLDWQTAAARSTKAKFDQNSNHPQMPPVLQVTHLPFSPRHHHQFLSNGDPGTAGGLSLTIGAGMAGHWPPQQQQGW…
LOC_Os04g55560.4	MAFDLDWQTAAARSTKAKFDQNSNHPQMPPVLQVTHLPFSPRHHHQFLSNGDPGTAGGLSLTIGAGMAGHWPPQQQQGWGNAGGMSWPHPPHPPPPPTNAAAAATATAAAASSRFPPYIATQASTWLQKNGFHSLTRPT*
LOC_Os04g55970.2	MDMDTSHHYPWLNFSLAHHCEMEEEERGAAAELAAIAGAAPPPKLEDFLGGGCNGGSSGGACPPVQTTAPTAAELYESELKFLAAGFQLSGAAGAAPPVPALLPAAALEQTDETKQLALPPQAAVAPPPEQKKAVDSFGQRTSIYRGVTRHRWTGRYEAHLWDNSCRREGQSRKGRQGGYDKEEKAARAYDLAALKYWGPSTTTNFPVAEYEKELEEMKHMTRQEFVASLRRKSSGFSRGASIYRGVTRHHQHGRWQARIGRVAGNKDLYLGTFGTEEEAAEAYDIAAIKFRGLNAVTNFEIGRYNVESIISSNLPIGSMAGNRSTKAGLELAPSSSADAIAATEANHTGVAPPSTLAFTALPMKYDQADYLSYLALQHHQQGNLQGLGFGLYSSGVNL…
LOC_Os04g55970.1	MKHMTRQEFVASLRRKSSGFSRGASIYRGVTRHHQHGRWQARIGRVAGNKDLYLGTFGTEEEAAEAYDIAAIKFRGLNAVTNFEIGRYNVESIISSNLPIGSMAGNRSTKAGLELAPSSSADAIAATEANHTGVAPPSTLAFTALPMKYDQADYLSYLALQHHQQGNLQGLGFGLYSSGVNLDFANANGNGAMSNCYTNVSLHEQQQQHQHQHQQEQQQDQQDDQSQSSNNSCGSIPFATPIAFSGSYESSMTAAGTFGYYPNVAAFQTPIFGME*
LOC_Os05g03040.1	MELDLNNVAEGVVEKHETAARSDSGTSESSVLNGEASGAAIAPAEEGSSSTPPSPPPPPAAVLEFSILRSSASASGENDADDDEEEEATPSPPPHHQHQQLLVTRELFPSAAPSPQHWAELGFLRPDPPRPHPDIRILAHAPPPAPPPPPPQPQPQAAKKSRRGPRSRSSQYRGVTFYRRTGRWESHIWDCGKQVYLGGFDTAHAAARAYDRAAIKFRGVEADINFNLSDYEEDMRQMKSLSKEEFVHVLRRQSTGFSRGSSKYRGVTLHKCGRWEARMGQFLGKKYIYLGLFDSEVEAARAYDKAAIKCNGREAVTNFEPSTYDGELPTDAAAQGADVDLNLRISQPAASQQSPKRDSGSLGLQIHHGSFEGSEFKRAKNDAAPSELASRPHRFPLLT…
LOC_Os05g03040.2	MELDLNNVAEGVVEKHETAARSDSGTSESSVLNGEASGAAIAPAEEGSSSTPPSPPPPPAAVLEFSILRSSASASGENDADDDEEEEATPSPPPHHQHQQLLVTRELFPSAAPSPQHWAELGFLRPDPPRPHPDIRILAHAPPPAPPPPPPQPQPQAAKKSRRGPRSRSSQYRGVTFYRRTGRWESHIWDCGKQVYLGGFDTAHAAARAYDRAAIKFRGVEADINFNLSDYEEDMRQMKSLSKEEFVHVLRRQSTGFSRGSSKYRGVTLHKCGRWEARMGQFLGKKYIYLGLFDSEVEAARLSSAWILFSCTIDSNQKKVFSFLKFYFLVLLIFDGPCTDSNLLSFFFSSFFSSRFKHQGL*
LOC_Os05g03040.3	MELDLNNVAEGVVEKHETAARSDSGTSESSVLNGEASGAAIAPAEEGSSSTPPSPPPPPAAVLEFSILRSSASASGENDADDDEEEEATPSPPPHHQHQQLLVTRELFPSAAPSPQHWAELGFLRPDPPRPHPDIRILAHAPPPAPPPPPPQPQPQAAKKSRRGPRSRSSQYRGVTFYRRTGRWESHIWDCGKQVYLGGFDTAHAAARAYDRAAIKFRGVEADINFNLSDYEEDMRQMKSLSKEEFVHVLRRQSTGFSRGSSKYRGVTLHKCGRWEARMGQFLGKKYIYLGLFDSEVEAARLSSAWILFSCTIDSNQKKVFSFLKFYFLVLLIFDGPCTDSNLLSFFFSSFFSSRFKHQGL*
LOC_Os05g45954.1	MDHSIMMVKNEIENYSGSSPAMIINALEGGAEAGPVVRRRRREPSLLAPINGDGDTNGGGIGKSSLSGITVKRSSRFRGVSRFRACRDDKKMLSCRHRWTGRFEAHLWDKNSWNPTQRKKGKQVYLGAYDEEEAAARAYDLAALKYWGPTTYTNFPVMDYEKELKIMENLTKEEYLASLRRKSSGFSRGVSKYRGVARHHQNGRWEARIGRVFGNKYLYLGTYSTQEEAARAYDIAAIEYKGVNAVTNFDLRSYITWLKPTPAHVAMNPAEALAMQIPVDHFLPMETQMMMLPQSNPFTSYHNAQSLGGGDGGSSSTNNQEASMIISPSGSSRKRSSSTALSLLLKSSMFRQLVEKNSDAGEENGGEMREPGAHPGEGYEYHNFFQGDAAPDMDMCDLL…
LOC_Os06g05340.1	METYGLVKDELLHGIGGGQGRLYCEVKPTAAPAVITAAGGGAKSVKRRKREPSAAAMSAVTVAGNGKEAGGSNAANKRSSRFRGVSRHRWTGRFEAHLWDKGTWNPTQKKKGKQVYLGAYNEEDAAARAYDLAALKYWGPTTYTNFPVADYEKELKLMQGVSKEEYLASIRRKSNGFSRGVSKYRGVARHHHNGRWEARIGRVFGNKYLYLGTYSTQEEAARAYDIAAIEYRGINAVTNFDLSTYIRWLKPPSSSSAAGTPHHHGGGMVVGADRVLAPAQSYPISAAADDDVAGCWRPLPSPSSSTTTALSLLLRSSMFQELVARQPVVEGDDGQLAVVSGDDADADADSDVKEPPPESEYGEVFASDEAAAAAAYGCSMYELDDSFALIDDSVWNCLI*
LOC_Os06g43220.1	MCRDCGKQVYLGGFDTAQAAARAYDQAAIKFRGVEADINFTLDDYKEDIKKMNNFSKEEFVQVLRRQGAGFVRGSSRFRGVTLHKCGKWEARIGQLMGKKYVYLGLYDTEMEAAKAYDKAAIKCCGKEAVTNFDTQAYEDELNLQSWDSELDLELSLGCSGGERAAGEVLHSAPSNQRTSLTFMLPEEEEMTACHRQRSIWARPSLAPAMPDGGAVIRPDQHQHHPSSRNMLLMSQVISSSGGGGGSGRQGAAELHMRPRHGWSSGGNNWAPPYAARPRLPGAEDDEDDDSAAAASSGFPMGQVATASSPSRPSSSSCSSRRSSTAAATATTGR*
LOC_Os06g44750.1	MKSMTRQEFIASLRRKSSGFSRGASIYRGVTRHHQHGRWQARIGRVAGNKDLYLGTFSTQEEAAEAYDIAAIKFRGLNAVTNFDMSRYDVDSILNSDLPVGGGAATRASKFPSDPSLPLPSPAMPPSEKDYWSLLALHYHHHQQQQQQQQFPASAFDTYGCSSGVNVDFTMGTSSHSGSNSNSSSSSAIWGTAAGAAMGRQQNGGSSNKQSNSYSGNNIPYAAAAAMTSGSALYGGSTGSNGTWVASNTSTAPHFYNYLFGME*
LOC_Os07g13170.2	MVLDLNVESPGGSAATSSSSTPPPPPDGGGGGYFRFDLLGGSPDEDGCSSPVMTRQLFPSPSAVVALAGDGSSTPPLTMPMPAAAGEGPWPRRAADLGVAQSQRSPAGGKKSRRGPRSRSSQYRGVTFYRRTGRWESHIWDCGKQVYLGGFDTAHAAARAYDRAAIKFRGLDADINFNLNDYEDDLKQMRNWTKEEFVHILRRQSTGFARGSSKYRGVTLHKCGRWEARMGQLLGKKYIYLGLFDSEIEAARAYDRAAIRFNGREAVTNFDPSSYDGDVLPETDNEVVDGDIIDLNLRISQPNVHELKSDGTLTGFQLNCDSPEASSSVVTQPISPQWPVLPQGTSMSQHPHLYASPCPGFFVNLREVPMEKRPELGPQSFPTSWSWQMQGSPLPLLPT…
LOC_Os07g13170.1	MVLDLNVESPGGSAATSSSSTPPPPPDGGGGGYFRFDLLGGSPDEDGCSSPVMTRQLFPSPSAVVALAGDGSSTPPLTMPMPAAAGEGPWPRRAADLGVAQSQRSPAGGKKSRRGPRSRSSQYRGVTFYRRTGRWESHIWDCGKQVYLGGFDTAHAAARAYDRAAIKFRGLDADINFNLNDYEDDLKQMRNWTKEEFVHILRRQSTGFARGSSKYRGVTLHKCGRWEARMGQLLGKKYIYLGLFDSEIEAARAYDRAAIRFNGREAVTNFDPSSYDGDVLPETDNEVVDGDIIDLNLRISQPNVHELKSDGTLTGFQLNCDSPEASSSVVTQPISPQWPVLPQGTSMSQHPHLYASPCPGFFVNLREVPMEKRPELGPQSFPTSWSWQMQGSPLPLLPT…
LOC_Os08g07440.1	MATVQPAASDPAPPPPPETEEQPAAAGGEEIAALDEQLAVADGGGDDGKAAAAAEGGGGGGGGKLVAETMRKYAAPRSSRYHGVTRLKWSGKFEAHLWDNSSQVEGRKRKGKHVQEAMLLKRMLQGHMTLQPLNIGVQGQTPNLTSMFLIMRKKSRG*
LOC_Os08g34360.1	MEGQSREEYIGSLRRKSSGFSRGVSKYRGVARHHHNGKWEARIGRVFGNKYLYLGTYATQEEAAVAYDIAAIEHRGLNAVTNFDINLYIRWYHGSCRSSSAAAATTIEDDDFAEAIAAALQGVDEQPSSSPATTRQLQTADDDDDDLVAQLPPQLRPLARAASTSPIGLLLRSPKFKEIIEQAAAAAASSSGSSSSSSTDSPSSSSSSSLSPSPLPSPPPQQQPTVPKDDQYNVDMSSVAAARCSFPDDVQTYFGLDDDGFGYPEVDTFLFGDLGAYAAPMFQFELDV*
LOC_Os09g25600.1	MGGPDWPCFWQQVPLSRYLRDAGGGGNGVRHGGHRVSGPERRHQLRPQPVHQVAPARRRRRGRSPESSPHAGCSVGAGSPGDRPRRHGVVVPARRPWRRGGGGTADPGKTFARPHADNVGAQPAAAVAQVQGDDRADVGGGDHHHQQHNHLLLVPVAAAGDQGRRRLAAVQLPGGHPDLLRLRRRGRRRRRGIRRRGRPVLRRPRRVRVAGVPLRAGLVTAAPPLPQPSSVSLCLASSPTATAQYSYRPLIKFFNWVDLVHRRMTKKREGTDEQTNGRQARMQDTLIAQASAYRVNDSIIVTS*
LOC_Os11g03540.1	MAKRSSPDPASSSPSASSSPSSPSSSSSEDSSSPMSMPCKRRARPRTDKSTGKAKRPKKESKEVVDPSSNGGGGGGGGKRSSIYRGVTRHRWTGRFEAHLWDKNCSTSLQNKKKGRQGCLGAYDSEEAAARAYDLAALKYWGPETVLNFPLEEYEKERSEMEGVSREEYLASLRRRSSGFSRGVSKYRGVARHHHNGRWEARIGRVLGNKYLYLGTFDTQEEAAKAYDLAAIEYRGANAVTNFDISCYLDQPQLLAQLQQEPQLLAQLQQELQVVPALHEEPQDDDRSENAVQELSSSEANTSSDNNEPLAADDSAECMNEPLPIVDGIEESLWSPCLDYELDTMPGAYFSNSMNFSEWFNDEAFEGGMEYLFEGCSSITEGGNSMDNSGVTEYNLFEE…
LOC_Os11g19060.1	MASITNWLGFSSSSFSGAGADPVLPHPPLQEWGSAYEGGGTVAAAGGEETAAPKLEDFLGMQVQQETAAAAAGHGRGGSSSVVGLSMIKNWLRSQPPPAVVGGEDAMMALAVSTSASPPVDATVPACISPDGMGSKAADGGGAAEAAAAAAAQRMKAAMDTFGQRTSIYRGVTKHRWTGRYEAHLWDNSCRREGQTRKGRQVNAGGYDKEEKAARAYDLAALKYWGTTTTTNFPVSNYEKELDEMKHMNRQEFVASLRRKSSGFSRGASIYRGVTRHHQHGRWQARIGRVAGNKDLYLGTFGTQEEAAEAYDIAAIKFRGLNAVTNFDMSRYDVKSIIESSNLPIGTGTTRRLKDSSDHTDNVMDINVNTEPNNVVSSHFTNGVGNYGSQHYGYNGWSP…
LOC_Os12g03290.1	MAKRSSPDPASSSPSASSSPSSPSSSSSEDSSSPMSMPCKRRARPRTEKSTGKAKRPKKESKEVADPSSNGGGGGKRSSIYRGVTRHRWTGRFEAHLWDKNCSTSLQNKKKGRQGAYDSEEAAARAYDLAALKYWGPETVLNFPLEEYEKERSEMEGVSREEYLASLRRRSSGFSRGVSKYRGVARHHHNGRWEARIGRVLGNKYLYLGTFDTQEEAAKAYDLAAIEYRGANAVTNFDISCYLDQPQLLAQLQQEPQLLAQLQQEPQVVPALHEEPQDDDRSENAVQELSSSEANTSSDNNEPLAADDSAECMNEPLPIVDGIEESLWSPCLDYELDTMPGAYFSNSMNFSEWFNDEAFEGGMEYLFEGCSSITEGGNSMDNSGMAEYNLFEECNMLEK…
