# Supplementary material for: Genomic and functional insights into the AP2 transcription factor family reveal a key orchestrator of drought adaptation in cultivated sugarcane
Source: Research Square preprint supplement (doi:10.21203/rs.3.rs-8306373/v1), 2025-12-26
Supplement: Supplementary file 2 [file 533986ef36ed7930f4304d8c.xlsx]

## Sheet: Sheet1
Table S3. Anaylsis of duplicated ShAP2 gene pairs.
Gene ID	Gene Name	Gene ID	Gene Name	Duplication Type	Ka	Ks	Ka_Ks	Effective Length	cN	cS	Selection pressure	Divergence Time (Mya)
Sh_So05D0228420.t1	ShAP2-32	Sh_So07E0277001.t1	ShAP2-32	Segmental	0.0124351	0.00648372	1.91789	1563	14.5	2.5	Positive selection	0.531453
Sh_So05A0221040.t1	ShAP2-32	Sh_So07E0277001.t1	ShAP2-32	Segmental	0.0137392	0.00777713	1.76662	1563	16	3	Positive selection	0.637469
Sh_So05E0230644.t1	ShAP2-32	Sh_So07E0277001.t1	ShAP2-32	Segmental	0.0137392	0.00777713	1.76662	1563	16	3	Positive selection	0.637469
Sh_So02D0106388.t1	ShAP2-20	Sh_Ss02F0115175.t1	ShAP2-3	Segmental	0.0152548	0.00883229	1.72716	1335	15	3	Positive selection	0.723958
Sh_Ss10F0013894.t1	ShAP2-41	Sh_Ss10I0021852.t1	ShAP2-41	Segmental	0.0141323	0.00961552	1.46974	1314	14	3	Positive selection	0.788157
Sh_So02D0106381.t1	ShAP2-21	Sh_Ss02F0115175.t1	ShAP2-3	Segmental	0.0331788	0.0251833	1.31749	1479	35.3333	9.66667	Positive selection	2.0642
Sh_So02D0106381.t1	ShAP2-21	Sh_Ss02H0126639.t1	ShAP2-3	Segmental	0.0331788	0.0251833	1.31749	1479	35.3333	9.66667	Positive selection	2.0642
Sh_Ss02F0115175.t1	ShAP2-3	Sh_So02H0127032.t1	ShAP2-21	Segmental	0.0331788	0.0251833	1.31749	1479	35.3333	9.66667	Positive selection	2.0642
Sh_Ss02H0126639.t1	ShAP2-3	Sh_So02H0127032.t1	ShAP2-21	Segmental	0.0331788	0.0251833	1.31749	1479	35.3333	9.66667	Positive selection	2.0642
Sh_Ss01A0029784.t1	ShAP2-4	Sh_So01F0059317.t1	ShAP2-4	Segmental	0.0207488	0.0159947	1.29723	1242	19.1667	4.83333	Positive selection	1.31104
Sh_So01D0052028.t1	ShAP2-7	Sh_So01I0080775.t1	ShAP2-7	Segmental	0.0128915	0.0105892	1.21742	1554	15	4	Positive selection	0.867966
Sh_So01B0040202.t1	ShAP2-7	Sh_So01D0052028.t1	ShAP2-7	Segmental	0.013041	0.0107216	1.21632	1536	15	4	Positive selection	0.878824
Sh_So01D0052028.t1	ShAP2-7	Sh_So01F0063847.t1	ShAP2-7	Segmental	0.013041	0.0107216	1.21632	1536	15	4	Positive selection	0.878824
Sh_So05B0223586.t1	ShAP2-32	Sh_So07E0277001.t1	ShAP2-32	Segmental	0.012008	0.0103875	1.156	1563	14	4	Positive selection	0.851437
Sh_So01F0059317.t1	ShAP2-4	Sh_So01I0076097.t1	ShAP2-4	Segmental	0.00748669	0.0065147	1.1492	1248	7	2	Positive selection	0.533992
Sh_Ss10D0008861.t1	ShAP2-41	Sh_Ss10I0021852.t1	ShAP2-41	Segmental	0.0110722	0.00964127	1.14841	1314	11	3	Positive selection	0.790268
Sh_So02A0093121.t1	ShAP2-15	Sh_So02F0115836.t1	ShAP2-20	Segmental	0.0101826	0.00886928	1.14807	1329	10	3	Positive selection	0.72699
Sh_So02A0093121.t1	ShAP2-15	Sh_So02J0137656.t1	ShAP2-20	Segmental	0.0101826	0.00886928	1.14807	1329	10	3	Positive selection	0.72699
Sh_So07G0282914.t1	ShAP2-13	Sh_So07H0284923.t1	ShAP2-13	Segmental	0.0128768	0.0112441	1.14521	1455	14	4	Positive selection	0.921644
Sh_Ss01A0029784.t1	ShAP2-4	Sh_Ss01H0070214.t1	ShAP2-4	Segmental	0.0202394	0.0189233	1.06955	1272	19.1667	5.83333	Positive selection	1.55109
Sh_So02D0106388.t1	ShAP2-20	Sh_Sstig0338847.t1	ShAP2-3	Segmental	0.0153957	0.0150456	1.02327	1320	15	5	Positive selection	1.23325
Sh_So10A0001852.t1	ShAP2-62	Sh_So10L0028678.t1	ShAP2-68	Segmental	0.0802611	0.0786211	1.02086	1122	64.6667	20.3333	Positive selection	6.44435
Sh_Ss01A0031173.t1	ShAP2-3	Sh_So02D0106381.t1	ShAP2-21	Segmental	0.0292904	0.0291427	1.00507	1464	31	11	Positive selection	2.38875
Sh_So02D0106381.t1	ShAP2-21	Sh_Sstig0338847.t1	ShAP2-3	Segmental	0.0292904	0.0291427	1.00507	1464	31	11	Positive selection	2.38875
Sh_So10A0001852.t1	ShAP2-62	Sh_Ss10I0021852.t1	ShAP2-41	Segmental	0.116065	0.118059	0.983106	1158	94.25	30.75	Purifying selection	9.67699
Sh_So07A0267707.t1	ShAP2-13	Sh_So07G0282914.t1	ShAP2-13	Segmental	0.0110254	0.0112388	0.981011	1455	12	4	Purifying selection	0.921213
Sh_Ss02F0115175.t1	ShAP2-3	Sh_So02G0120026.t1	ShAP2-18	Segmental	0.0250926	0.0256916	0.976687	1611	29.3333	10.6667	Purifying selection	2.10587
Sh_So02G0120026.t1	ShAP2-18	Sh_Ss02H0126639.t1	ShAP2-3	Segmental	0.0250926	0.0256916	0.976687	1611	29.3333	10.6667	Purifying selection	2.10587
Sh_So10A0001852.t1	ShAP2-62	Sh_Ss10D0008861.t1	ShAP2-41	Segmental	0.118733	0.122229	0.971401	1158	96.25	31.75	Purifying selection	10.0188
Sh_Ss01A0029784.t1	ShAP2-4	Sh_So01E0053185.t1	ShAP2-4	Segmental	0.0189738	0.0195852	0.968782	1218	17.1667	5.83333	Purifying selection	1.60534
Sh_Ss01D0052059.t1	ShAP2-9	Sh_So01I0080775.t1	ShAP2-7	Segmental	0.007595	0.00785347	0.967088	1575	9	3	Purifying selection	0.643727
Sh_So09B0312389.t2	ShAP2-1	Sh_So09C0315205.t1	ShAP2-58	Segmental	0.0453348	0.0473219	0.95801	1080	36	12	Purifying selection	3.87884
Sh_So09B0312389.t2	ShAP2-1	Sh_So09E0321935.t1	ShAP2-58	Segmental	0.0453348	0.0473219	0.95801	1080	36	12	Purifying selection	3.87884
Sh_Ss01A0029784.t1	ShAP2-4	Sh_So01B0035826.t1	ShAP2-4	Segmental	0.0181002	0.0189284	0.956241	1272	17.1667	5.83333	Purifying selection	1.55151
Sh_Ss01A0029784.t1	ShAP2-4	Sh_So01K0087099.t1	ShAP2-4	Segmental	0.0181002	0.0189284	0.956241	1272	17.1667	5.83333	Purifying selection	1.55151
Sh_Ss01E0058393.t1	ShAP2-11	Sh_So01I0080775.t1	ShAP2-7	Segmental	0.0588465	0.0618319	0.951717	1554	66.4167	22.5833	Purifying selection	5.06819
Sh_So10K0026483.t1	ShAP2-67	Sh_So10L0028678.t1	ShAP2-68	Segmental	0.0125927	0.0134189	0.938434	1104	10.5	3.5	Purifying selection	1.09991
Sh_So01A0034954.t1	ShAP2-5	Sh_So01I0080775.t1	ShAP2-7	Segmental	0.049245	0.0555597	0.886344	1548	55.8333	20.1667	Purifying selection	4.55407
Sh_So01H0075256.t1	ShAP2-5	Sh_So01I0080775.t1	ShAP2-7	Segmental	0.049245	0.0555597	0.886344	1548	55.8333	20.1667	Purifying selection	4.55407
Sh_So03F0164872.t1	ShAP2-24	Sh_So03H0173014.t1	ShAP2-26	Segmental	0.0301442	0.0342313	0.880605	2196	48.9167	18.0833	Purifying selection	2.80584
Sh_So03F0164872.t1	ShAP2-24	Sh_So03I0177104.t1	ShAP2-26	Segmental	0.0301442	0.0342313	0.880605	2196	48.9167	18.0833	Purifying selection	2.80584
Sh_So05A0221040.t1	ShAP2-32	Sh_So05B0223586.t1	ShAP2-32	Segmental	0.00667227	0.0075822	0.879991	1602	8	3	Purifying selection	0.621492
Sh_So05B0223586.t1	ShAP2-32	Sh_So05E0230644.t1	ShAP2-32	Segmental	0.00667227	0.0075822	0.879991	1602	8	3	Purifying selection	0.621492
Sh_So03B0147883.t1	ShAP2-12	Sh_So03C0151847.t1	ShAP2-12	Segmental	0.00695192	0.00791147	0.878715	1257	6.5	2.5	Purifying selection	0.648481
Sh_So03C0151847.t1	ShAP2-12	Sh_So03H0172478.t1	ShAP2-12	Segmental	0.00695192	0.00791147	0.878715	1257	6.5	2.5	Purifying selection	0.648481
Sh_So09A0309711.t1	ShAP2-55	Sh_So09B0312389.t2	ShAP2-1	Segmental	0.00779101	0.00890659	0.874747	1371	8	3	Purifying selection	0.730048
Sh_So10A0001953.t1	ShAP2-63	Sh_Ss10E0011678.t1	ShAP2-66	Segmental	0.012086	0.0138492	0.872682	1209	11	4	Purifying selection	1.13518
Sh_Ss10F0013894.t1	ShAP2-41	Sh_So10H0019347.t1	ShAP2-41	Segmental	0.0114367	0.0131944	0.866785	1275	11	4	Purifying selection	1.08151
Sh_Ss01A0029784.t1	ShAP2-4	Sh_So01D0046960.t1	ShAP2-4	Segmental	0.0196555	0.0227017	0.865815	1242	18.1667	6.83333	Purifying selection	1.8608
Sh_Ss01A0029784.t1	ShAP2-4	Sh_So01I0076097.t1	ShAP2-4	Segmental	0.0191681	0.0222218	0.86258	1272	18.1667	6.83333	Purifying selection	1.82146
Sh_Ss10D0008861.t1	ShAP2-41	Sh_Ss10F0013894.t1	ShAP2-41	Segmental	0.0110815	0.0128483	0.862486	1314	11	4	Purifying selection	1.05314
Sh_So01E0057294.t1	ShAP2-6	Sh_So01F0063080.t1	ShAP2-6	Segmental	0.00527521	0.00620159	0.850623	1275	5	2	Purifying selection	0.508327
Sh_So01E0057294.t1	ShAP2-6	Sh_So01I0079867.t1	ShAP2-6	Segmental	0.00527521	0.00620159	0.850623	1275	5	2	Purifying selection	0.508327
Sh_So02C0102501.t1	ShAP2-19	Sh_So02F0115836.t1	ShAP2-20	Segmental	0.0394408	0.0467207	0.844183	1194	34	14	Purifying selection	3.82956
Sh_So02C0102501.t1	ShAP2-19	Sh_So02J0137656.t1	ShAP2-20	Segmental	0.0394408	0.0467207	0.844183	1194	34	14	Purifying selection	3.82956
Sh_So02E0110651.t1	ShAP2-19	Sh_So02F0115836.t1	ShAP2-20	Segmental	0.0394408	0.0467207	0.844183	1194	34	14	Purifying selection	3.82956
Sh_So02E0110651.t1	ShAP2-19	Sh_So02J0137656.t1	ShAP2-20	Segmental	0.0394408	0.0467207	0.844183	1194	34	14	Purifying selection	3.82956
Sh_So01D0052028.t1	ShAP2-7	Sh_Ss01D0052059.t1	ShAP2-9	Segmental	0.0111598	0.01326	0.841613	1554	13	5	Purifying selection	1.08689
Sh_So01A0034954.t1	ShAP2-5	Sh_So01B0040202.t1	ShAP2-7	Segmental	0.0437042	0.0524292	0.833586	1530	49.1667	18.8333	Purifying selection	4.29747
Sh_So01A0034954.t1	ShAP2-5	Sh_So01F0063847.t1	ShAP2-7	Segmental	0.0437042	0.0524292	0.833586	1530	49.1667	18.8333	Purifying selection	4.29747
Sh_So01B0040202.t1	ShAP2-7	Sh_So01H0075256.t1	ShAP2-5	Segmental	0.0437042	0.0524292	0.833586	1530	49.1667	18.8333	Purifying selection	4.29747
Sh_So01F0063847.t1	ShAP2-7	Sh_So01H0075256.t1	ShAP2-5	Segmental	0.0437042	0.0524292	0.833586	1530	49.1667	18.8333	Purifying selection	4.29747
Sh_So09A0311673.t1	ShAP2-38	Sh_Ss09H0332419.t1	ShAP2-61	Segmental	0.101006	0.122644	0.82357	1251	88.9167	35.0833	Purifying selection	10.0528
Sh_So07F0279334.t1	ShAP2-47	Sh_So07G0281951.t1	ShAP2-50	Segmental	0.00749819	0.00911173	0.822916	891	5	2	Purifying selection	0.746863
Sh_So07G0281951.t1	ShAP2-50	Sh_So07L0294630.t1	ShAP2-47	Segmental	0.00749819	0.00911173	0.822916	891	5	2	Purifying selection	0.746863
Sh_So09C0315205.t1	ShAP2-58	Sh_So09F0324133.t1	ShAP2-56	Segmental	0.0347918	0.042283	0.822832	1092	28.1667	10.8333	Purifying selection	3.46582
Sh_So09C0315205.t1	ShAP2-58	Sh_So09H0330687.t1	ShAP2-56	Segmental	0.0347918	0.042283	0.822832	1092	28.1667	10.8333	Purifying selection	3.46582
Sh_So09C0315205.t1	ShAP2-58	Sh_So09I0333962.t1	ShAP2-56	Segmental	0.0347918	0.042283	0.822832	1092	28.1667	10.8333	Purifying selection	3.46582
Sh_So09E0321935.t1	ShAP2-58	Sh_So09F0324133.t1	ShAP2-56	Segmental	0.0347918	0.042283	0.822832	1092	28.1667	10.8333	Purifying selection	3.46582
Sh_So09E0321935.t1	ShAP2-58	Sh_So09H0330687.t1	ShAP2-56	Segmental	0.0347918	0.042283	0.822832	1092	28.1667	10.8333	Purifying selection	3.46582
Sh_So09E0321935.t1	ShAP2-58	Sh_So09I0333962.t1	ShAP2-56	Segmental	0.0347918	0.042283	0.822832	1092	28.1667	10.8333	Purifying selection	3.46582
Sh_Ss07D0274362.t1	ShAP2-48	Sh_So07F0279334.t1	ShAP2-47	Segmental	0.00773103	0.0094082	0.821733	864	5	2	Purifying selection	0.771164
Sh_Ss07D0274362.t1	ShAP2-48	Sh_So07L0294630.t1	ShAP2-47	Segmental	0.00773103	0.0094082	0.821733	864	5	2	Purifying selection	0.771164
Sh_So09F0325841.t1	ShAP2-38	Sh_Ss09H0332419.t1	ShAP2-61	Segmental	0.100911	0.123004	0.820387	1251	88.9167	35.0833	Purifying selection	10.0823
Sh_Ss07C0272062.t1	ShAP2-47	Sh_Ss07D0274362.t1	ShAP2-48	Segmental	0.00785656	0.00961937	0.816744	849	5	2	Purifying selection	0.788473
Sh_So01A0034954.t1	ShAP2-5	Sh_Ss01D0052059.t1	ShAP2-9	Segmental	0.0439584	0.0543422	0.808917	1620	52.3333	20.6667	Purifying selection	4.45428
Sh_Ss01D0052059.t1	ShAP2-9	Sh_So01H0075256.t1	ShAP2-5	Segmental	0.0439584	0.0543422	0.808917	1620	52.3333	20.6667	Purifying selection	4.45428
Sh_So01A0034954.t1	ShAP2-5	Sh_So01D0052028.t1	ShAP2-7	Segmental	0.0499241	0.0617422	0.808589	1530	55.8333	22.1667	Purifying selection	5.06084
Sh_So01D0052028.t1	ShAP2-7	Sh_So01H0075256.t1	ShAP2-5	Segmental	0.0499241	0.0617422	0.808589	1530	55.8333	22.1667	Purifying selection	5.06084
Sh_So01D0052028.t1	ShAP2-7	Sh_Ss01E0058393.t1	ShAP2-11	Segmental	0.0541875	0.0672126	0.806212	1539	60.6667	24.3333	Purifying selection	5.50923
Sh_So07C0272850.t1	ShAP2-46	Sh_So07G0282914.t1	ShAP2-13	Segmental	0.0170279	0.0211779	0.804041	1458	18.5	7.5	Purifying selection	1.73589
Sh_So06B0236953.t1	ShAP2-38	Sh_Ss09H0332419.t1	ShAP2-61	Segmental	0.0956806	0.121528	0.787316	1248	84.4167	34.5833	Purifying selection	9.96127
Sh_Ss09H0332419.t1	ShAP2-61	Sh_Ss09I0335653.t1	ShAP2-38	Segmental	0.0996968	0.126823	0.786108	1251	87.9167	36.0833	Purifying selection	10.3953
Sh_Ss10F0013894.t1	ShAP2-41	Sh_So10G0017010.t1	ShAP2-41	Segmental	0.0101216	0.0128759	0.786092	1308	10	4	Purifying selection	1.0554
Sh_Ss01A0031173.t1	ShAP2-3	Sh_So02G0120026.t1	ShAP2-18	Segmental	0.0223769	0.0293675	0.76196	1596	26	12	Purifying selection	2.40718
Sh_So02G0120026.t1	ShAP2-18	Sh_Sstig0338847.t1	ShAP2-3	Segmental	0.0223769	0.0293675	0.76196	1596	26	12	Purifying selection	2.40718
Sh_So09B0314326.t1	ShAP2-38	Sh_Ss09H0332419.t1	ShAP2-61	Segmental	0.102165	0.134363	0.760368	1251	89.9167	38.0833	Purifying selection	11.0133
Sh_So09B0313864.t1	ShAP2-38	Sh_Ss09H0332419.t1	ShAP2-61	Segmental	0.102165	0.134363	0.760368	1251	89.9167	38.0833	Purifying selection	11.0133
Sh_So09C0317379.t1	ShAP2-38	Sh_Ss09H0332419.t1	ShAP2-61	Segmental	0.102165	0.134363	0.760368	1251	89.9167	38.0833	Purifying selection	11.0133
Sh_So09D0320168.t1	ShAP2-38	Sh_Ss09H0332419.t1	ShAP2-61	Segmental	0.102165	0.134363	0.760368	1251	89.9167	38.0833	Purifying selection	11.0133
Sh_So09C0317339.t1	ShAP2-38	Sh_Ss09H0332419.t1	ShAP2-61	Segmental	0.102126	0.134521	0.759183	1251	89.9167	38.0833	Purifying selection	11.0263
Sh_Ss01D0052059.t1	ShAP2-9	Sh_Ss01E0058393.t1	ShAP2-11	Segmental	0.0466402	0.0618074	0.754607	1623	55.4167	23.5833	Purifying selection	5.06618
Sh_So02A0093121.t1	ShAP2-15	Sh_So02C0102501.t1	ShAP2-19	Segmental	0.0283773	0.0377043	0.752629	1260	26	12	Purifying selection	3.09051
Sh_So02A0093121.t1	ShAP2-15	Sh_So02E0110651.t1	ShAP2-19	Segmental	0.0283773	0.0377043	0.752629	1260	26	12	Purifying selection	3.09051
Sh_Ss09G0329169.t1	ShAP2-38	Sh_Ss09H0332419.t1	ShAP2-61	Segmental	0.0991695	0.132023	0.751155	1242	86.9167	37.0833	Purifying selection	10.8215
Sh_So01D0052028.t1	ShAP2-7	Sh_So01G0069299.t1	ShAP2-11	Segmental	0.0433792	0.0579413	0.748676	1560	49.5	21.5	Purifying selection	4.74928
Sh_So10A0001852.t1	ShAP2-62	Sh_So10H0019347.t1	ShAP2-41	Segmental	0.0969088	0.129501	0.748322	1176	80.6667	34.3333	Purifying selection	10.6149
Sh_So03A0144159.t1	ShAP2-12	Sh_So03C0151847.t1	ShAP2-12	Segmental	0.00588238	0.00789481	0.745095	1257	5.5	2.5	Purifying selection	0.647116
Sh_So07C0272850.t1	ShAP2-46	Sh_Ss07D0275185.t1	ShAP2-13	Segmental	0.00806339	0.0108354	0.744171	1494	9	4	Purifying selection	0.888148
Sh_So01B0040202.t1	ShAP2-7	Sh_Ss01E0058393.t1	ShAP2-11	Segmental	0.0512657	0.0691509	0.74136	1530	57.25	24.75	Purifying selection	5.6681
Sh_Ss01E0058393.t1	ShAP2-11	Sh_So01F0063847.t1	ShAP2-7	Segmental	0.0512657	0.0691509	0.74136	1530	57.25	24.75	Purifying selection	5.6681
Sh_So03C0151847.t1	ShAP2-12	Sh_So03I0176506.t1	ShAP2-12	Segmental	0.00593155	0.00800221	0.741239	1245	5.5	2.5	Purifying selection	0.655919
Sh_So01G0069299.t1	ShAP2-11	Sh_So01I0080775.t1	ShAP2-7	Segmental	0.052552	0.0709081	0.741128	1548	59.25	25.75	Purifying selection	5.81214
Sh_So03F0164872.t1	ShAP2-24	Sh_Ss03G0169019.t1	ShAP2-24	Segmental	0.00570918	0.00781384	0.730649	2097	9	4	Purifying selection	0.640479
Sh_So02B0097639.t3	ShAP2-18	Sh_Ss02F0115175.t1	ShAP2-3	Segmental	0.0261046	0.0357888	0.729405	1602	30.3333	14.6667	Purifying selection	2.93351
Sh_So02B0097639.t3	ShAP2-18	Sh_Ss02H0126639.t1	ShAP2-3	Segmental	0.0261046	0.0357888	0.729405	1602	30.3333	14.6667	Purifying selection	2.93351
Sh_So02D0106381.t1	ShAP2-21	Sh_So02G0120026.t1	ShAP2-18	Segmental	0.00546782	0.00762073	0.717494	1497	6	3	Purifying selection	0.62465
Sh_So02G0120026.t1	ShAP2-18	Sh_So02H0127032.t1	ShAP2-21	Segmental	0.00546782	0.00762073	0.717494	1497	6	3	Purifying selection	0.62465
Sh_So03A0144627.t1	ShAP2-24	Sh_So03F0164872.t1	ShAP2-24	Segmental	0.00715453	0.0100437	0.712342	2046	11	5	Purifying selection	0.823252
Sh_So02E0110823.t2	ShAP2-18	Sh_So02G0120026.t1	ShAP2-18	Segmental	0.00509124	0.00718568	0.708525	1602	6	3	Purifying selection	0.58899
Sh_Ss01D0052059.t1	ShAP2-9	Sh_So01G0069299.t1	ShAP2-11	Segmental	0.0464624	0.0666812	0.696783	1611	54.75	25.25	Purifying selection	5.46567
Sh_So02C0102501.t1	ShAP2-19	Sh_Ss02F0115175.t1	ShAP2-3	Segmental	0.0442417	0.0640479	0.69076	1194	38	19	Purifying selection	5.24983
Sh_So02C0102501.t1	ShAP2-19	Sh_Ss02H0126639.t1	ShAP2-3	Segmental	0.0442417	0.0640479	0.69076	1194	38	19	Purifying selection	5.24983
Sh_So02E0110651.t1	ShAP2-19	Sh_Ss02F0115175.t1	ShAP2-3	Segmental	0.0442417	0.0640479	0.69076	1194	38	19	Purifying selection	5.24983
Sh_So02E0110651.t1	ShAP2-19	Sh_Ss02H0126639.t1	ShAP2-3	Segmental	0.0442417	0.0640479	0.69076	1194	38	19	Purifying selection	5.24983
Sh_So10A0001852.t1	ShAP2-62	Sh_So10K0026483.t1	ShAP2-67	Segmental	0.104183	0.150945	0.690205	1197	87.9167	40.0833	Purifying selection	12.3726
Sh_So06E0245456.t3	ShAP2-37	Sh_So06K0265859.t1	ShAP2-44	Segmental	0.207346	0.301858	0.6869	1350	181.5	86.5	Purifying selection	24.7424
Sh_So02A0093121.t1	ShAP2-15	Sh_Ss02F0115175.t1	ShAP2-3	Segmental	0.0157719	0.0230898	0.683066	1377	16	8	Purifying selection	1.89261
Sh_So02A0093121.t1	ShAP2-15	Sh_Ss02H0126639.t1	ShAP2-3	Segmental	0.0157719	0.0230898	0.683066	1377	16	8	Purifying selection	1.89261
Sh_So01F0059317.t1	ShAP2-4	Sh_So01J0081528.t1	ShAP2-4	Segmental	0.0211908	0.0310609	0.682233	1248	19.6667	9.33333	Purifying selection	2.54598
Sh_So01C0044873.t1	ShAP2-6	Sh_So01E0057294.t1	ShAP2-6	Segmental	0.00846271	0.0124355	0.680528	1275	8	4	Purifying selection	1.0193
Sh_So06B0237242.t3	ShAP2-37	Sh_So06K0265859.t1	ShAP2-44	Segmental	0.159413	0.234566	0.679609	1275	136.167	65.8333	Purifying selection	19.2267
Sh_So09B0312389.t2	ShAP2-1	Sh_So09F0324133.t1	ShAP2-56	Segmental	0.0180918	0.0267886	0.675357	1302	17.5	8.5	Purifying selection	2.19578
Sh_So09B0312389.t2	ShAP2-1	Sh_So09H0330687.t1	ShAP2-56	Segmental	0.0180918	0.0267886	0.675357	1302	17.5	8.5	Purifying selection	2.19578
Sh_So09B0312389.t2	ShAP2-1	Sh_So09I0333962.t1	ShAP2-56	Segmental	0.0180918	0.0267886	0.675357	1302	17.5	8.5	Purifying selection	2.19578
Sh_So01B0040202.t1	ShAP2-7	Sh_So01G0069299.t1	ShAP2-11	Segmental	0.049655	0.0751505	0.660741	1524	55.25	26.75	Purifying selection	6.15988
Sh_So01F0063847.t1	ShAP2-7	Sh_So01G0069299.t1	ShAP2-11	Segmental	0.049655	0.0751505	0.660741	1524	55.25	26.75	Purifying selection	6.15988
Sh_So07F0279334.t1	ShAP2-47	Sh_So07H0284224.t1	ShAP2-47	Segmental	0.00593475	0.00900912	0.658749	900	4	2	Purifying selection	0.738452
Sh_So07H0284224.t1	ShAP2-47	Sh_So07L0294630.t1	ShAP2-47	Segmental	0.00593475	0.00900912	0.658749	900	4	2	Purifying selection	0.738452
Sh_So09A0309711.t1	ShAP2-55	Sh_So09C0315205.t1	ShAP2-58	Segmental	0.0311766	0.0473842	0.657953	1080	25	12	Purifying selection	3.88395
Sh_So09A0309711.t1	ShAP2-55	Sh_So09E0321935.t1	ShAP2-58	Segmental	0.0311766	0.0473842	0.657953	1080	25	12	Purifying selection	3.88395
Sh_So09B0312379.t1	ShAP2-56	Sh_So09D0318253.t3	ShAP2-59	Segmental	0.0508423	0.0773228	0.657533	1341	49.5833	24.4167	Purifying selection	6.33793
Sh_So09D0318253.t3	ShAP2-59	Sh_So09F0324133.t1	ShAP2-56	Segmental	0.0508423	0.0773228	0.657533	1341	49.5833	24.4167	Purifying selection	6.33793
Sh_So09D0318253.t3	ShAP2-59	Sh_So09H0330687.t1	ShAP2-56	Segmental	0.0508423	0.0773228	0.657533	1341	49.5833	24.4167	Purifying selection	6.33793
Sh_So09D0318253.t3	ShAP2-59	Sh_So09I0333962.t1	ShAP2-56	Segmental	0.0508423	0.0773228	0.657533	1341	49.5833	24.4167	Purifying selection	6.33793
Sh_So07A0267707.t1	ShAP2-13	Sh_So07C0272850.t1	ShAP2-46	Segmental	0.00549663	0.00839365	0.654855	1455	6	3	Purifying selection	0.688004
Sh_So10A0001852.t1	ShAP2-62	Sh_So10C0006638.t1	ShAP2-41	Segmental	0.07348	0.1132	0.649115	1134	60.1667	28.8333	Purifying selection	9.2787
Sh_So10A0001852.t1	ShAP2-62	Sh_So10J0024255.t1	ShAP2-41	Segmental	0.07348	0.1132	0.649115	1134	60.1667	28.8333	Purifying selection	9.2787
Sh_So01C0043513.t1	ShAP2-4	Sh_So01F0059317.t1	ShAP2-4	Segmental	0.0200987	0.0310609	0.647074	1248	18.6667	9.33333	Purifying selection	2.54598
Sh_So01E0053177.t1	ShAP2-4	Sh_So01F0059317.t1	ShAP2-4	Segmental	0.0200987	0.0310609	0.647074	1248	18.6667	9.33333	Purifying selection	2.54598
Sh_Ss06I0258368.t1	ShAP2-43	Sh_So06K0265859.t1	ShAP2-44	Segmental	0.176311	0.273437	0.644797	1281	149.5	75.5	Purifying selection	22.4129
Sh_So01B0040202.t1	ShAP2-7	Sh_Ss01D0052059.t1	ShAP2-9	Segmental	0.00511366	0.00794359	0.643746	1557	6	3	Purifying selection	0.651114
Sh_Ss01D0052059.t1	ShAP2-9	Sh_So01F0063847.t1	ShAP2-7	Segmental	0.00511366	0.00794359	0.643746	1557	6	3	Purifying selection	0.651114
Sh_Ss07D0275185.t1	ShAP2-13	Sh_So07K0293406.t1	ShAP2-52	Segmental	0.025463	0.0399374	0.637573	1476	27.8333	14.1667	Purifying selection	3.27356
Sh_So07H0284923.t1	ShAP2-13	Sh_So07K0293406.t1	ShAP2-52	Segmental	0.0260489	0.0412659	0.631245	1440	27.8333	14.1667	Purifying selection	3.38245
Sh_Ss06A0234620.t1	ShAP2-35	Sh_Ss06F0247946.t3	ShAP2-37	Segmental	0.146911	0.233049	0.630388	1236	122.833	63.1667	Purifying selection	19.1024
Sh_So10C0006638.t1	ShAP2-41	Sh_Ss10F0013894.t1	ShAP2-41	Segmental	0.0121686	0.0193663	0.628338	1308	12	6	Purifying selection	1.5874
Sh_Ss10F0013894.t1	ShAP2-41	Sh_So10J0024255.t1	ShAP2-41	Segmental	0.0121686	0.0193663	0.628338	1308	12	6	Purifying selection	1.5874
Sh_Ss10D0008861.t1	ShAP2-41	Sh_So10H0019347.t1	ShAP2-41	Segmental	0.0082931	0.0132308	0.626804	1275	8	4	Purifying selection	1.08449
Sh_So10G0017010.t1	ShAP2-41	Sh_Ss10I0021852.t1	ShAP2-41	Segmental	0.00605147	0.00966197	0.626318	1308	6	3	Purifying selection	0.791965
Sh_So09D0318253.t3	ShAP2-59	Sh_Ss09H0330681.t1	ShAP2-60	Segmental	0.0292234	0.0467503	0.625096	1404	30.3333	15.6667	Purifying selection	3.83199
Sh_Ss06A0234620.t1	ShAP2-35	Sh_So06E0245456.t3	ShAP2-37	Segmental	0.200232	0.323058	0.619801	1305	171.25	86.75	Purifying selection	26.4802
Sh_Ss06A0234620.t1	ShAP2-35	Sh_Ss06I0258368.t1	ShAP2-43	Segmental	0.165952	0.268671	0.617678	1275	141.083	73.9167	Purifying selection	22.0222
Sh_Ss06A0234620.t1	ShAP2-35	Sh_Ss06I0258221.t1	ShAP2-43	Segmental	0.165952	0.268671	0.617678	1275	141.083	73.9167	Purifying selection	22.0222
Sh_So07B0269966.t1	ShAP2-45	Sh_So07G0282914.t1	ShAP2-13	Segmental	0.0211996	0.0343244	0.617624	1458	23	12	Purifying selection	2.81347
Sh_Ss06A0234620.t1	ShAP2-35	Sh_So06B0237242.t3	ShAP2-37	Segmental	0.182618	0.297071	0.614728	1284	155.75	79.25	Purifying selection	24.3501
Sh_So01B0036017.t1	ShAP2-8	Sh_So01J0084347.t1	ShAP2-8	Segmental	0.00636721	0.0104289	0.610535	1236	6	3	Purifying selection	0.854828
Sh_So01J0084347.t1	ShAP2-8	Sh_So05A0219867.t1	ShAP2-8	Segmental	0.00636721	0.0104289	0.610535	1236	6	3	Purifying selection	0.854828
Sh_So01A0034954.t1	ShAP2-5	Sh_Ss01E0058393.t1	ShAP2-11	Segmental	0.036436	0.0596943	0.610377	1638	44	23	Purifying selection	4.89297
Sh_Ss01E0058393.t1	ShAP2-11	Sh_So01H0075256.t1	ShAP2-5	Segmental	0.036436	0.0596943	0.610377	1638	44	23	Purifying selection	4.89297
Sh_Ss07D0275185.t1	ShAP2-13	Sh_So07G0282914.t1	ShAP2-13	Segmental	0.0119616	0.0197287	0.606305	1455	13	7	Purifying selection	1.61711
Sh_So04B0191568.t1	ShAP2-28	Sh_So04G0208887.t1	ShAP2-31	Segmental	0.0391538	0.0648086	0.604145	1935	56	29	Purifying selection	5.31218
Sh_So04B0191568.t1	ShAP2-28	Sh_Sotig0348766.t1	ShAP2-31	Segmental	0.0391538	0.0648086	0.604145	1935	56	29	Purifying selection	5.31218
Sh_Ss06H0251338.t1	ShAP2-42	Sh_Sotig0336242.t1	ShAP2-70	Segmental	0.0493175	0.0818487	0.602545	1533	55.8333	28.1667	Purifying selection	6.70891
Sh_Ss06F0247946.t3	ShAP2-37	Sh_So06K0265859.t1	ShAP2-44	Segmental	0.167246	0.278155	0.601269	1257	140.167	74.8333	Purifying selection	22.7996
Sh_Ss10A0000409.t1	ShAP2-64	Sh_So10K0025133.t1	ShAP2-49	Segmental	0.0577987	0.0964318	0.599374	1470	60.6667	34.3333	Purifying selection	7.90425
Sh_So02C0102501.t1	ShAP2-19	Sh_So02D0106381.t1	ShAP2-21	Segmental	0.0417072	0.0696185	0.599082	1185	35.6667	20.3333	Purifying selection	5.70643
Sh_So02D0106381.t1	ShAP2-21	Sh_So02E0110651.t1	ShAP2-19	Segmental	0.0417072	0.0696185	0.599082	1185	35.6667	20.3333	Purifying selection	5.70643
Sh_So05B0222760.t1	ShAP2-33	Sh_Ss06H0251338.t1	ShAP2-42	Segmental	0.0810384	0.135639	0.597458	1779	103.583	53.4167	Purifying selection	11.1179
Sh_So09E0321935.t1	ShAP2-58	Sh_Ss09H0330681.t1	ShAP2-60	Segmental	0.0507916	0.0856326	0.593133	1074	40	21	Purifying selection	7.01907
Sh_So07G0282914.t1	ShAP2-13	Sh_So07K0293406.t1	ShAP2-52	Segmental	0.0302544	0.0518586	0.583401	1443	32.3333	17.6667	Purifying selection	4.25071
Sh_Ss01A0031173.t1	ShAP2-3	Sh_So02B0097639.t3	ShAP2-18	Segmental	0.0216216	0.0371363	0.582222	1587	25	15	Purifying selection	3.04396
Sh_So02B0097639.t3	ShAP2-18	Sh_Sstig0338847.t1	ShAP2-3	Segmental	0.0216216	0.0371363	0.582222	1587	25	15	Purifying selection	3.04396
Sh_So09B0312389.t2	ShAP2-1	Sh_So09D0318253.t3	ShAP2-59	Segmental	0.0261241	0.0449267	0.581483	1362	26.3333	14.6667	Purifying selection	3.68251
Sh_So09A0309711.t1	ShAP2-55	Sh_So09B0312379.t1	ShAP2-56	Segmental	0.0293611	0.0505506	0.580825	1422	30.8333	17.1667	Purifying selection	4.14349
Sh_So09A0309711.t1	ShAP2-55	Sh_So09F0324133.t1	ShAP2-56	Segmental	0.0293611	0.0505506	0.580825	1422	30.8333	17.1667	Purifying selection	4.14349
Sh_So09A0309711.t1	ShAP2-55	Sh_So09H0330687.t1	ShAP2-56	Segmental	0.0293611	0.0505506	0.580825	1422	30.8333	17.1667	Purifying selection	4.14349
Sh_So09A0309711.t1	ShAP2-55	Sh_So09I0333962.t1	ShAP2-56	Segmental	0.0293611	0.0505506	0.580825	1422	30.8333	17.1667	Purifying selection	4.14349
Sh_So02C0102501.t1	ShAP2-19	Sh_So02D0106388.t1	ShAP2-20	Segmental	0.0396825	0.0685408	0.578962	1185	34	20	Purifying selection	5.6181
Sh_So02C0102501.t1	ShAP2-19	Sh_So02F0117597.t1	ShAP2-20	Segmental	0.0396825	0.0685408	0.578962	1185	34	20	Purifying selection	5.6181
Sh_So02D0106388.t1	ShAP2-20	Sh_So02E0110651.t1	ShAP2-19	Segmental	0.0396825	0.0685408	0.578962	1185	34	20	Purifying selection	5.6181
Sh_So02E0110651.t1	ShAP2-19	Sh_So02F0117597.t1	ShAP2-20	Segmental	0.0396825	0.0685408	0.578962	1185	34	20	Purifying selection	5.6181
Sh_Ss10A0000409.t1	ShAP2-64	Sh_So10E0010081.t1	ShAP2-64	Segmental	0.00915064	0.0158526	0.577231	1482	10	6	Purifying selection	1.2994
Sh_So02C0102501.t1	ShAP2-19	Sh_So02G0120026.t1	ShAP2-18	Segmental	0.0369519	0.0640479	0.576941	1197	32	19	Purifying selection	5.24983
Sh_So02E0110651.t1	ShAP2-19	Sh_So02G0120026.t1	ShAP2-18	Segmental	0.0369519	0.0640479	0.576941	1197	32	19	Purifying selection	5.24983
Sh_So07G0281951.t1	ShAP2-50	Sh_So07J0290675.t1	ShAP2-54	Segmental	0.0068396	0.0118991	0.5748	1977	10	6	Purifying selection	0.975337
Sh_So10F0012616.t1	ShAP2-64	Sh_So10K0025133.t1	ShAP2-49	Segmental	0.0583278	0.101899	0.57241	1479	61.5	36.5	Purifying selection	8.35235
Sh_So01B0039287.t1	ShAP2-6	Sh_So01C0044873.t1	ShAP2-6	Segmental	0.00528171	0.00928804	0.568657	1275	5	3	Purifying selection	0.761315
Sh_So01C0044873.t1	ShAP2-6	Sh_So01G0068899.t1	ShAP2-6	Segmental	0.00528171	0.00928804	0.568657	1275	5	3	Purifying selection	0.761315
Sh_So01A0034078.t1	ShAP2-6	Sh_So01C0044873.t1	ShAP2-6	Segmental	0.00528078	0.00929284	0.568264	1275	5	3	Purifying selection	0.761708
Sh_So04A0188110.t1	ShAP2-28	Sh_So04G0208887.t1	ShAP2-31	Segmental	0.043803	0.0772708	0.566877	1959	63.1667	34.8333	Purifying selection	6.33367
Sh_So04A0188110.t1	ShAP2-28	Sh_Sotig0348766.t1	ShAP2-31	Segmental	0.043803	0.0772708	0.566877	1959	63.1667	34.8333	Purifying selection	6.33367
Sh_Ss10I0020547.t1	ShAP2-64	Sh_So10K0025133.t1	ShAP2-49	Segmental	0.0607024	0.108064	0.561724	1458	63	38	Purifying selection	8.85775
Sh_Ss10E0011531.t1	ShAP2-41	Sh_Ss10I0021852.t1	ShAP2-41	Segmental	0.00904837	0.0161297	0.560977	1314	9	5	Purifying selection	1.3221
Sh_Ss01A0031173.t1	ShAP2-3	Sh_So02C0102501.t1	ShAP2-19	Segmental	0.0447191	0.0798441	0.56008	1179	38	23	Purifying selection	6.5446
Sh_Ss01A0031173.t1	ShAP2-3	Sh_So02E0110651.t1	ShAP2-19	Segmental	0.0447191	0.0798441	0.56008	1179	38	23	Purifying selection	6.5446
Sh_So02C0102501.t1	ShAP2-19	Sh_Sstig0338847.t1	ShAP2-3	Segmental	0.0447191	0.0798441	0.56008	1179	38	23	Purifying selection	6.5446
Sh_So02E0110651.t1	ShAP2-19	Sh_Sstig0338847.t1	ShAP2-3	Segmental	0.0447191	0.0798441	0.56008	1179	38	23	Purifying selection	6.5446
Sh_So07C0272850.t1	ShAP2-46	Sh_So07K0293406.t1	ShAP2-52	Segmental	0.0171966	0.0308095	0.55816	1482	19	11	Purifying selection	2.52537
Sh_So01E0053185.t1	ShAP2-4	Sh_So01J0081528.t1	ShAP2-4	Segmental	0.0195337	0.0350511	0.557291	1218	17.6667	10.3333	Purifying selection	2.87304
Sh_So01D0046960.t1	ShAP2-4	Sh_So01E0053185.t1	ShAP2-4	Segmental	0.00563171	0.0101754	0.553464	1188	5	3	Purifying selection	0.834049
Sh_Ss03G0169019.t1	ShAP2-24	Sh_So03H0173014.t1	ShAP2-26	Segmental	0.0122443	0.0222115	0.55126	2064	18.9167	11.0833	Purifying selection	1.82061
Sh_Ss03G0169019.t1	ShAP2-24	Sh_So03I0177104.t1	ShAP2-26	Segmental	0.0122443	0.0222115	0.55126	2064	18.9167	11.0833	Purifying selection	1.82061
Sh_Ss01H0070214.t1	ShAP2-4	Sh_So01J0081528.t1	ShAP2-4	Segmental	0.0185443	0.0337074	0.550155	1278	17.6667	10.3333	Purifying selection	2.7629
Sh_So01B0035826.t1	ShAP2-4	Sh_So01J0081528.t1	ShAP2-4	Segmental	0.0185427	0.0337166	0.549957	1278	17.6667	10.3333	Purifying selection	2.76366
Sh_So01J0081528.t1	ShAP2-4	Sh_So01K0087099.t1	ShAP2-4	Segmental	0.0185427	0.0337166	0.549957	1278	17.6667	10.3333	Purifying selection	2.76366
Sh_So07F0279334.t1	ShAP2-47	Sh_So07J0290675.t1	ShAP2-54	Segmental	0.00810709	0.0147849	0.548337	825	5	3	Purifying selection	1.21187
Sh_So07J0290675.t1	ShAP2-54	Sh_So07L0294630.t1	ShAP2-47	Segmental	0.00810709	0.0147849	0.548337	825	5	3	Purifying selection	1.21187
Sh_So10H0019347.t1	ShAP2-41	Sh_Ss10I0021852.t1	ShAP2-41	Segmental	0.00725144	0.0132308	0.548074	1275	7	4	Purifying selection	1.08449
Sh_So01A0034954.t1	ShAP2-5	Sh_So01G0069299.t1	ShAP2-11	Segmental	0.0358725	0.0655295	0.547426	1626	43	25	Purifying selection	5.37127
Sh_So01G0069299.t1	ShAP2-11	Sh_So01H0075256.t1	ShAP2-5	Segmental	0.0358725	0.0655295	0.547426	1626	43	25	Purifying selection	5.37127
Sh_Ss10D0008861.t1	ShAP2-41	Sh_So10G0017010.t1	ShAP2-41	Segmental	0.00706481	0.0129105	0.547215	1308	7	4	Purifying selection	1.05824
Sh_So01B0035826.t1	ShAP2-4	Sh_So01D0046960.t1	ShAP2-4	Segmental	0.00534095	0.00978807	0.54566	1248	5	3	Purifying selection	0.802301
Sh_So01D0046960.t1	ShAP2-4	Sh_So01K0087099.t1	ShAP2-4	Segmental	0.00534095	0.00978807	0.54566	1248	5	3	Purifying selection	0.802301
Sh_Ss10A0000409.t1	ShAP2-64	Sh_So10C0005301.t1	ShAP2-64	Segmental	0.0101322	0.018651	0.54325	1473	11	7	Purifying selection	1.52877
Sh_So10E0010081.t1	ShAP2-64	Sh_So10K0025133.t1	ShAP2-49	Segmental	0.0602648	0.111132	0.542281	1479	63.5	39.5	Purifying selection	9.10918
Sh_So07F0280037.t1	ShAP2-50	Sh_So07G0281951.t1	ShAP2-50	Segmental	0.00728402	0.0134404	0.541951	2043	11	7	Purifying selection	1.10167
Sh_So07G0281951.t1	ShAP2-50	Sh_So07K0292590.t1	ShAP2-50	Segmental	0.00728402	0.0134404	0.541951	2043	11	7	Purifying selection	1.10167
Sh_So10A0001852.t1	ShAP2-62	Sh_So10G0017010.t1	ShAP2-41	Segmental	0.051561	0.0954833	0.54	1092	41.1667	23.8333	Purifying selection	7.8265
Sh_So09A0311673.t1	ShAP2-38	Sh_So09C0317339.t1	ShAP2-38	Segmental	0.00511598	0.00948379	0.539445	1299	5	3	Purifying selection	0.77736
Sh_Ss07D0274362.t1	ShAP2-48	Sh_So07F0280037.t1	ShAP2-50	Segmental	0.019977	0.0370773	0.538793	2004	29.3333	18.6667	Purifying selection	3.03912
Sh_Ss07D0274362.t1	ShAP2-48	Sh_So07K0292590.t1	ShAP2-50	Segmental	0.019977	0.0370773	0.538793	2004	29.3333	18.6667	Purifying selection	3.03912
Sh_So10G0016305.t1	ShAP2-28	Sh_So04G0208887.t1	ShAP2-31	Segmental	0.0468004	0.0870324	0.537735	1953	67.1667	38.8333	Purifying selection	7.13381
Sh_So10G0016305.t1	ShAP2-28	Sh_Sotig0348766.t1	ShAP2-31	Segmental	0.0468004	0.0870324	0.537735	1953	67.1667	38.8333	Purifying selection	7.13381
Sh_So09C0317339.t1	ShAP2-38	Sh_So09F0325841.t1	ShAP2-38	Segmental	0.00511162	0.00950884	0.537565	1299	5	3	Purifying selection	0.779413
Sh_So02B0097639.t3	ShAP2-18	Sh_So02D0106381.t1	ShAP2-21	Segmental	0.00546866	0.010174	0.537515	1497	6	4	Purifying selection	0.833931
Sh_So02B0097639.t3	ShAP2-18	Sh_So02H0127032.t1	ShAP2-21	Segmental	0.00546866	0.010174	0.537515	1497	6	4	Purifying selection	0.833931
Sh_Ss10B0002990.t1	ShAP2-64	Sh_So10K0025133.t1	ShAP2-49	Segmental	0.0566666	0.105859	0.535304	1470	59.5	37.5	Purifying selection	8.67695
Sh_So06A0234672.t1	ShAP2-36	Sh_So06G0250725.t2	ShAP2-40	Segmental	0.00642469	0.0120756	0.532039	1416	6.83333	4.16667	Purifying selection	0.989804
Sh_So01D0046960.t1	ShAP2-4	Sh_So01J0081528.t1	ShAP2-4	Segmental	0.0201023	0.0378664	0.530874	1248	18.6667	11.3333	Purifying selection	3.10381
Sh_So02B0097639.t3	ShAP2-18	Sh_So02E0110823.t2	ShAP2-18	Segmental	0.00509196	0.00959246	0.530829	1602	6	4	Purifying selection	0.786267
Sh_So10C0005301.t1	ShAP2-64	Sh_So10K0025133.t1	ShAP2-49	Segmental	0.0579096	0.109336	0.52965	1464	60.5	38.5	Purifying selection	8.96194
Sh_So01I0076097.t1	ShAP2-4	Sh_So01J0081528.t1	ShAP2-4	Segmental	0.0196061	0.0370614	0.529017	1278	18.6667	11.3333	Purifying selection	3.03782
Sh_So07G0282914.t1	ShAP2-13	Sh_Ss07I0288124.t1	ShAP2-53	Segmental	0.0178793	0.0338222	0.528626	1308	17.5	10.5	Purifying selection	2.77231
Sh_So01F0059317.t1	ShAP2-4	Sh_Ss01H0070214.t1	ShAP2-4	Segmental	0.00856311	0.0163896	0.522472	1248	8	5	Purifying selection	1.34341
Sh_Ss10F0013894.t1	ShAP2-41	Sh_So10L0028678.t1	ShAP2-68	Segmental	0.0149885	0.0288868	0.518871	1107	12.5	7.5	Purifying selection	2.36777
Sh_So01A0029773.t1	ShAP2-4	Sh_Ss01H0070214.t1	ShAP2-4	Segmental	0.0174823	0.0337074	0.518648	1278	16.6667	10.3333	Purifying selection	2.7629
Sh_So01C0043513.t1	ShAP2-4	Sh_Ss01H0070214.t1	ShAP2-4	Segmental	0.0174823	0.0337074	0.518648	1278	16.6667	10.3333	Purifying selection	2.7629
Sh_So01B0035826.t1	ShAP2-4	Sh_So01C0043513.t1	ShAP2-4	Segmental	0.0174808	0.0337166	0.518462	1278	16.6667	10.3333	Purifying selection	2.76366
Sh_So01B0035826.t1	ShAP2-4	Sh_So01E0053177.t1	ShAP2-4	Segmental	0.0174808	0.0337166	0.518462	1278	16.6667	10.3333	Purifying selection	2.76366
Sh_So01C0043513.t1	ShAP2-4	Sh_So01K0087099.t1	ShAP2-4	Segmental	0.0174808	0.0337166	0.518462	1278	16.6667	10.3333	Purifying selection	2.76366
Sh_Ss07D0274362.t1	ShAP2-48	Sh_Ss07I0287506.t1	ShAP2-50	Segmental	0.019708	0.0383502	0.513895	1995	28.8333	19.1667	Purifying selection	3.14346
Sh_So07B0269966.t1	ShAP2-45	Sh_So07H0284923.t1	ShAP2-13	Segmental	0.0151927	0.0299256	0.507683	1455	16.5	10.5	Purifying selection	2.45292
Sh_So01J0084347.t1	ShAP2-8	Sh_Sotig0336242.t1	ShAP2-70	Segmental	0.00533715	0.0105326	0.506725	1227	5	3	Purifying selection	0.863332
Sh_So10H0018192.t1	ShAP2-64	Sh_So10K0025133.t1	ShAP2-49	Segmental	0.0542448	0.107098	0.506495	1470	57	38	Purifying selection	8.77856
Sh_So10J0022903.t1	ShAP2-64	Sh_So10K0025133.t1	ShAP2-49	Segmental	0.0542448	0.107098	0.506495	1470	57	38	Purifying selection	8.77856
Sh_So02A0093121.t1	ShAP2-15	Sh_So02E0110823.t2	ShAP2-18	Segmental	0.020883	0.0413084	0.50554	1368	21	14	Purifying selection	3.38593
Sh_So01A0029773.t1	ShAP2-4	Sh_So01D0046960.t1	ShAP2-4	Segmental	0.0190116	0.0378664	0.502071	1248	17.6667	11.3333	Purifying selection	3.10381
Sh_So01C0043513.t1	ShAP2-4	Sh_So01D0046960.t1	ShAP2-4	Segmental	0.0190116	0.0378664	0.502071	1248	17.6667	11.3333	Purifying selection	3.10381
Sh_So01D0046960.t1	ShAP2-4	Sh_So01E0053177.t1	ShAP2-4	Segmental	0.0190116	0.0378664	0.502071	1248	17.6667	11.3333	Purifying selection	3.10381
Sh_So10C0006638.t1	ShAP2-41	Sh_Ss10I0021852.t1	ShAP2-41	Segmental	0.00808361	0.016147	0.500625	1308	8	5	Purifying selection	1.32353
Sh_Ss10I0021852.t1	ShAP2-41	Sh_So10J0024255.t1	ShAP2-41	Segmental	0.00808361	0.016147	0.500625	1308	8	5	Purifying selection	1.32353
Sh_So01C0043513.t1	ShAP2-4	Sh_So01I0076097.t1	ShAP2-4	Segmental	0.0185427	0.0370614	0.500323	1278	17.6667	11.3333	Purifying selection	3.03782
Sh_So01E0053177.t1	ShAP2-4	Sh_So01I0076097.t1	ShAP2-4	Segmental	0.0185427	0.0370614	0.500323	1278	17.6667	11.3333	Purifying selection	3.03782
Sh_Ss07D0274362.t1	ShAP2-48	Sh_So07G0281951.t1	ShAP2-50	Segmental	0.0206417	0.0413117	0.499658	2004	30.3333	20.6667	Purifying selection	3.3862
Sh_So10A0001852.t1	ShAP2-62	Sh_Ss10F0013894.t1	ShAP2-41	Segmental	0.0548668	0.110216	0.497812	1092	43.6667	27.3333	Purifying selection	9.03408
Sh_Ss10A0000409.t1	ShAP2-64	Sh_Ss10B0002990.t1	ShAP2-64	Segmental	0.00915273	0.0185154	0.494331	1482	10	7	Purifying selection	1.51765
Sh_So01D0046960.t1	ShAP2-4	Sh_So01I0076097.t1	ShAP2-4	Segmental	0.00641372	0.0130794	0.49037	1248	6	4	Purifying selection	1.07208
Sh_Ss07D0274362.t1	ShAP2-48	Sh_So07H0284224.t1	ShAP2-47	Segmental	0.00925343	0.0188763	0.490213	867	6	4	Purifying selection	1.54724
Sh_So02A0093121.t1	ShAP2-15	Sh_So02D0106381.t1	ShAP2-21	Segmental	0.0216231	0.0444104	0.486893	1263	20	14	Purifying selection	3.6402
Sh_So02A0093121.t1	ShAP2-15	Sh_So02H0127032.t1	ShAP2-21	Segmental	0.0216231	0.0444104	0.486893	1263	20	14	Purifying selection	3.6402
Sh_So02B0097639.t3	ShAP2-18	Sh_So02C0102501.t1	ShAP2-19	Segmental	0.0384177	0.0789751	0.486453	1188	33	23	Purifying selection	6.47337
Sh_So02B0097639.t3	ShAP2-18	Sh_So02E0110651.t1	ShAP2-19	Segmental	0.0384177	0.0789751	0.486453	1188	33	23	Purifying selection	6.47337
Sh_So04C0194994.t1	ShAP2-28	Sh_So04G0208887.t1	ShAP2-31	Segmental	0.0483578	0.0995726	0.485654	1947	69.1667	43.8333	Purifying selection	8.16169
Sh_So04C0194994.t1	ShAP2-28	Sh_Sotig0348766.t1	ShAP2-31	Segmental	0.0483578	0.0995726	0.485654	1947	69.1667	43.8333	Purifying selection	8.16169
Sh_So07F0280037.t1	ShAP2-50	Sh_So07J0290675.t1	ShAP2-54	Segmental	0.00753388	0.0158657	0.474852	1977	11	8	Purifying selection	1.30047
Sh_So07J0290675.t1	ShAP2-54	Sh_So07K0292590.t1	ShAP2-50	Segmental	0.00753388	0.0158657	0.474852	1977	11	8	Purifying selection	1.30047
Sh_So10C0006638.t1	ShAP2-41	Sh_Ss10D0008861.t1	ShAP2-41	Segmental	0.00910021	0.0194186	0.468635	1308	9	6	Purifying selection	1.59169
Sh_Ss10D0008861.t1	ShAP2-41	Sh_So10J0024255.t1	ShAP2-41	Segmental	0.00910021	0.0194186	0.468635	1308	9	6	Purifying selection	1.59169
Sh_Ss10E0011531.t1	ShAP2-41	Sh_Ss10F0013894.t1	ShAP2-41	Segmental	0.00905595	0.0193455	0.468117	1314	9	6	Purifying selection	1.5857
Sh_So07F0280037.t1	ShAP2-50	Sh_Ss07I0287506.t1	ShAP2-50	Segmental	0.00765313	0.0164099	0.466372	2034	11.5	8.5	Purifying selection	1.34508
Sh_Ss07I0287506.t1	ShAP2-50	Sh_So07K0292590.t1	ShAP2-50	Segmental	0.00765313	0.0164099	0.466372	2034	11.5	8.5	Purifying selection	1.34508
Sh_So09A0309711.t1	ShAP2-55	Sh_So09D0318253.t3	ShAP2-59	Segmental	0.0263185	0.056531	0.465558	1398	27.25	18.75	Purifying selection	4.63369
Sh_So03A0144627.t1	ShAP2-24	Sh_Ss03G0169019.t1	ShAP2-24	Segmental	0.00649882	0.0141157	0.460397	2046	10	7	Purifying selection	1.15702
Sh_So07A0267707.t1	ShAP2-13	Sh_So07K0293406.t1	ShAP2-52	Segmental	0.0203566	0.0442664	0.459865	1440	21.8333	15.1667	Purifying selection	3.62839
Sh_So01D0046960.t1	ShAP2-4	Sh_Ss01H0070214.t1	ShAP2-4	Segmental	0.0074887	0.0163807	0.457167	1248	7	5	Purifying selection	1.34268
Sh_Ss10D0008861.t1	ShAP2-41	Sh_So10L0028678.t1	ShAP2-68	Segmental	0.0149735	0.0329298	0.454712	1107	12.5	8.5	Purifying selection	2.69916
Sh_So01A0030411.t1	ShAP2-2	Sh_So02B0097053.t1	ShAP2-16	Segmental	0.242458	0.534701	0.453446	1722	267.75	164.25	Purifying selection	43.8279
Sh_So01D0048708.t1	ShAP2-2	Sh_So02B0097053.t1	ShAP2-16	Segmental	0.242458	0.534701	0.453446	1722	267.75	164.25	Purifying selection	43.8279
Sh_Ss10B0002990.t1	ShAP2-64	Sh_So10E0010081.t1	ShAP2-64	Segmental	0.00777624	0.0171549	0.453295	1482	8.5	6.5	Purifying selection	1.40614
Sh_Ss02H0127356.t1	ShAP2-22	Sh_So07B0269966.t1	ShAP2-45	Segmental	0.323683	0.715645	0.452295	1161	229.917	132.083	Purifying selection	58.6594
Sh_So01A0030411.t1	ShAP2-2	Sh_So02A0092513.t1	ShAP2-16	Segmental	0.245747	0.543639	0.45204	1722	270.75	166.25	Purifying selection	44.5606
Sh_So01D0048708.t1	ShAP2-2	Sh_So02A0092513.t1	ShAP2-16	Segmental	0.245747	0.543639	0.45204	1722	270.75	166.25	Purifying selection	44.5606
Sh_So01G0065069.t1	ShAP2-2	Sh_So02B0097053.t1	ShAP2-16	Segmental	0.241426	0.534398	0.451772	1722	266.75	164.25	Purifying selection	43.8031
Sh_So01G0065069.t1	ShAP2-2	Sh_So02A0092513.t1	ShAP2-16	Segmental	0.244711	0.54333	0.450391	1722	269.75	166.25	Purifying selection	44.5352
Sh_Ss07D0274362.t1	ShAP2-48	Sh_So07J0290675.t1	ShAP2-54	Segmental	0.019982	0.0448126	0.445901	1935	28.3333	21.6667	Purifying selection	3.67316
Sh_So01F0059719.t1	ShAP2-2	Sh_So02B0097053.t1	ShAP2-16	Segmental	0.238367	0.539403	0.441909	1722	264.083	164.917	Purifying selection	44.2134
Sh_So07G0281951.t1	ShAP2-50	Sh_Ss07I0287506.t1	ShAP2-50	Segmental	0.00896921	0.0203567	0.440603	2037	13.5	10.5	Purifying selection	1.66858
Sh_So07H0284224.t1	ShAP2-47	Sh_So07J0290675.t1	ShAP2-54	Segmental	0.00648215	0.0147606	0.439151	825	4	3	Purifying selection	1.20989
Sh_So09B0312379.t1	ShAP2-56	Sh_Ss09H0330681.t1	ShAP2-60	Segmental	0.0296091	0.0675302	0.438457	1374	30	22	Purifying selection	5.53527
Sh_So09F0324133.t1	ShAP2-56	Sh_Ss09H0330681.t1	ShAP2-60	Segmental	0.0296091	0.0675302	0.438457	1374	30	22	Purifying selection	5.53527
Sh_Ss10B0002990.t1	ShAP2-64	Sh_So10C0005301.t1	ShAP2-64	Segmental	0.00874847	0.0199613	0.438272	1473	9.5	7.5	Purifying selection	1.63617
Sh_Ss03B0148465.t1	ShAP2-24	Sh_So03F0164872.t1	ShAP2-24	Segmental	0.016623	0.0380208	0.437207	2094	26	19	Purifying selection	3.11646
Sh_So01A0030411.t1	ShAP2-2	Sh_So02D0105737.t1	ShAP2-16	Segmental	0.23363	0.543809	0.429617	1764	265.75	170.25	Purifying selection	44.5745
Sh_So01D0048708.t1	ShAP2-2	Sh_So02D0105737.t1	ShAP2-16	Segmental	0.23363	0.543809	0.429617	1764	265.75	170.25	Purifying selection	44.5745
Sh_So06B0237242.t3	ShAP2-37	Sh_Ss06I0258368.t1	ShAP2-43	Segmental	0.009148	0.0213104	0.429274	1323	9	7	Purifying selection	1.74676
Sh_So06B0237242.t3	ShAP2-37	Sh_Ss06I0258221.t1	ShAP2-43	Segmental	0.009148	0.0213104	0.429274	1323	9	7	Purifying selection	1.74676
Sh_Ss01A0031173.t1	ShAP2-3	Sh_So02F0115836.t1	ShAP2-20	Segmental	0.014527	0.0338954	0.428585	1305	14	11	Purifying selection	2.77831
Sh_Ss01A0031173.t1	ShAP2-3	Sh_So02J0137656.t1	ShAP2-20	Segmental	0.014527	0.0338954	0.428585	1305	14	11	Purifying selection	2.77831
Sh_So02F0115836.t1	ShAP2-20	Sh_Sstig0338847.t1	ShAP2-3	Segmental	0.014527	0.0338954	0.428585	1305	14	11	Purifying selection	2.77831
Sh_So02J0137656.t1	ShAP2-20	Sh_Sstig0338847.t1	ShAP2-3	Segmental	0.014527	0.0338954	0.428585	1305	14	11	Purifying selection	2.77831
Sh_So01G0065069.t1	ShAP2-2	Sh_So02D0105737.t1	ShAP2-16	Segmental	0.232633	0.543507	0.428023	1764	264.75	170.25	Purifying selection	44.5498
Sh_So02A0093121.t1	ShAP2-15	Sh_So02G0120026.t1	ShAP2-18	Segmental	0.0187233	0.0438081	0.427393	1380	19	15	Purifying selection	3.59083
Sh_Ss10D0008861.t1	ShAP2-41	Sh_Ss10E0011531.t1	ShAP2-41	Segmental	0.011074	0.0259766	0.426307	1314	11	8	Purifying selection	2.12923
Sh_Ss01C0041559.t1	ShAP2-2	Sh_So02B0097053.t1	ShAP2-16	Segmental	0.239391	0.561999	0.425964	1671	256.917	165.083	Purifying selection	46.0655
Sh_So01C0044873.t1	ShAP2-6	Sh_So01F0063080.t1	ShAP2-6	Segmental	0.00528171	0.0124098	0.425608	1275	5	4	Purifying selection	1.0172
Sh_So01C0044873.t1	ShAP2-6	Sh_So01I0079867.t1	ShAP2-6	Segmental	0.00528171	0.0124098	0.425608	1275	5	4	Purifying selection	1.0172
Sh_So10H0019347.t1	ShAP2-41	Sh_So10L0028678.t1	ShAP2-68	Segmental	0.00898394	0.0211146	0.425484	1104	7.5	5.5	Purifying selection	1.73071
Sh_Ss01C0041559.t1	ShAP2-2	Sh_So02A0092513.t1	ShAP2-16	Segmental	0.24159	0.572204	0.422209	1671	258.917	167.083	Purifying selection	46.902
Sh_So01A0030411.t1	ShAP2-2	Sh_So02C0101655.t1	ShAP2-16	Segmental	0.239203	0.566851	0.421986	1776	273.25	175.75	Purifying selection	46.4632
Sh_So01D0048708.t1	ShAP2-2	Sh_So02C0101655.t1	ShAP2-16	Segmental	0.239203	0.566851	0.421986	1776	273.25	175.75	Purifying selection	46.4632
Sh_So01G0065069.t1	ShAP2-2	Sh_So02C0101655.t1	ShAP2-16	Segmental	0.238208	0.566532	0.420467	1776	272.25	175.75	Purifying selection	46.437
Sh_So07A0267707.t1	ShAP2-13	Sh_Ss07D0275185.t1	ShAP2-13	Segmental	0.00826771	0.0196779	0.420153	1455	9	7	Purifying selection	1.61294
Sh_So01F0059719.t1	ShAP2-2	Sh_So02D0105737.t1	ShAP2-16	Segmental	0.229688	0.548472	0.418778	1764	262.083	170.917	Purifying selection	44.9567
Sh_So06C0239949.t1	ShAP2-36	Sh_So06G0250725.t2	ShAP2-40	Segmental	0.0111573	0.026854	0.41548	1416	11.8333	9.16667	Purifying selection	2.20114
Sh_So01A0030411.t1	ShAP2-2	Sh_Ss02H0125156.t1	ShAP2-16	Segmental	0.229448	0.553871	0.414262	1764	261.75	172.25	Purifying selection	45.3993
Sh_So02A0093121.t1	ShAP2-15	Sh_So02F0117597.t1	ShAP2-20	Segmental	0.0112707	0.0272207	0.414049	1320	11	9	Purifying selection	2.23121
Sh_So01G0065069.t1	ShAP2-2	Sh_Ss02H0125156.t1	ShAP2-16	Segmental	0.228457	0.553561	0.412704	1764	260.75	172.25	Purifying selection	45.3738
Sh_So01F0059719.t1	ShAP2-2	Sh_So02C0101655.t1	ShAP2-16	Segmental	0.237966	0.577694	0.411924	1776	272.083	177.917	Purifying selection	47.352
Sh_Ss10B0002990.t1	ShAP2-64	Sh_So10F0012616.t1	ShAP2-64	Segmental	0.00593927	0.01449	0.409887	1482	6.5	5.5	Purifying selection	1.18771
Sh_Ss02H0127356.t1	ShAP2-22	Sh_So07H0284923.t1	ShAP2-13	Segmental	0.300277	0.738376	0.406671	1158	215.917	134.083	Purifying selection	60.5227
Sh_Ss02H0127356.t1	ShAP2-22	Sh_Ss07D0275185.t1	ShAP2-13	Segmental	0.267313	0.65755	0.406529	1125	190.667	121.333	Purifying selection	53.8975
Sh_So10E0010081.t1	ShAP2-64	Sh_So10H0018192.t1	ShAP2-64	Segmental	0.0064015	0.015797	0.405236	1482	7	6	Purifying selection	1.29483
Sh_So10E0010081.t1	ShAP2-64	Sh_So10J0022903.t1	ShAP2-64	Segmental	0.0064015	0.015797	0.405236	1482	7	6	Purifying selection	1.29483
Sh_So09A0311673.t1	ShAP2-38	Sh_So09B0314326.t1	ShAP2-38	Segmental	0.00511773	0.0126585	0.404291	1299	5	4	Purifying selection	1.03758
Sh_So09A0311673.t1	ShAP2-38	Sh_So09B0313864.t1	ShAP2-38	Segmental	0.00511773	0.0126585	0.404291	1299	5	4	Purifying selection	1.03758
Sh_So09A0311673.t1	ShAP2-38	Sh_So09D0320168.t1	ShAP2-38	Segmental	0.00511773	0.0126585	0.404291	1299	5	4	Purifying selection	1.03758
Sh_So10C0005301.t1	ShAP2-64	Sh_So10E0010081.t1	ShAP2-64	Segmental	0.00643485	0.0159369	0.403772	1473	7	6	Purifying selection	1.3063
Sh_So10C0005301.t1	ShAP2-64	Sh_So10F0012616.t1	ShAP2-64	Segmental	0.00643485	0.0159369	0.403772	1473	7	6	Purifying selection	1.3063
Sh_So01F0059719.t1	ShAP2-2	Sh_Ss02H0125156.t1	ShAP2-16	Segmental	0.225531	0.55862	0.403729	1764	258.083	172.917	Purifying selection	45.7885
Sh_Ss07I0287506.t1	ShAP2-50	Sh_So07J0290675.t1	ShAP2-54	Segmental	0.00929497	0.0230518	0.403222	1968	13.5	11.5	Purifying selection	1.88949
Sh_Ss01C0041559.t1	ShAP2-2	Sh_So02D0105737.t1	ShAP2-16	Segmental	0.229282	0.571689	0.401061	1713	253.917	171.083	Purifying selection	46.8597
Sh_Ss02H0127356.t1	ShAP2-22	Sh_So07C0272850.t1	ShAP2-46	Segmental	0.275761	0.692961	0.397946	1128	196	126	Purifying selection	56.8001
Sh_So10A0001852.t1	ShAP2-62	Sh_Ss10E0011531.t1	ShAP2-41	Segmental	0.0509236	0.128144	0.397393	1092	40.6667	31.3333	Purifying selection	10.5036
Sh_So10C0005301.t1	ShAP2-64	Sh_So10H0018192.t1	ShAP2-64	Segmental	0.00736428	0.018585	0.396248	1473	8	7	Purifying selection	1.52336
Sh_So10C0005301.t1	ShAP2-64	Sh_So10J0022903.t1	ShAP2-64	Segmental	0.00736428	0.018585	0.396248	1473	8	7	Purifying selection	1.52336
Sh_Ss10A0000409.t1	ShAP2-64	Sh_So10F0012616.t1	ShAP2-64	Segmental	0.00731156	0.0185276	0.39463	1482	8	7	Purifying selection	1.51866
Sh_So02A0094221.t1	ShAP2-17	Sh_Ss07I0288124.t1	ShAP2-53	Segmental	0.277504	0.704588	0.393853	1128	197.333	126.667	Purifying selection	57.7531
Sh_So09C0315205.t1	ShAP2-58	Sh_So09D0318253.t3	ShAP2-59	Segmental	0.0316155	0.0803079	0.393678	1002	23.5	18.5	Purifying selection	6.58262
Sh_So09D0318253.t3	ShAP2-59	Sh_So09E0321935.t1	ShAP2-58	Segmental	0.0316155	0.0803079	0.393678	1002	23.5	18.5	Purifying selection	6.58262
Sh_Ss01A0031173.t1	ShAP2-3	Sh_So02A0093121.t1	ShAP2-15	Segmental	0.0139077	0.0355096	0.39166	1362	14	12	Purifying selection	2.91062
Sh_So02A0093121.t1	ShAP2-15	Sh_Sstig0338847.t1	ShAP2-3	Segmental	0.0139077	0.0355096	0.39166	1362	14	12	Purifying selection	2.91062
Sh_So01E0053185.t1	ShAP2-4	Sh_So02A0093121.t1	ShAP2-15	Segmental	0.276593	0.708649	0.39031	1176	203.833	135.167	Purifying selection	58.086
Sh_Ss10A0000409.t1	ShAP2-64	Sh_So10H0018192.t1	ShAP2-64	Segmental	0.00823681	0.0211654	0.389164	1482	9	8	Purifying selection	1.73487
Sh_Ss10A0000409.t1	ShAP2-64	Sh_So10J0022903.t1	ShAP2-64	Segmental	0.00823681	0.0211654	0.389164	1482	9	8	Purifying selection	1.73487
Sh_So07H0284923.t1	ShAP2-13	Sh_Ss07I0288124.t1	ShAP2-53	Segmental	0.0112257	0.0288729	0.388796	1305	11	9	Purifying selection	2.36663
Sh_So01A0030411.t1	ShAP2-2	Sh_Ss02J0136929.t1	ShAP2-16	Segmental	0.229759	0.592213	0.387968	1767	262.417	180.583	Purifying selection	48.542
Sh_So01D0048708.t1	ShAP2-2	Sh_Ss02J0136929.t1	ShAP2-16	Segmental	0.229759	0.592213	0.387968	1767	262.417	180.583	Purifying selection	48.542
Sh_Ss01C0041559.t1	ShAP2-2	Sh_So02C0101655.t1	ShAP2-16	Segmental	0.232406	0.599995	0.387346	1725	259.167	176.833	Purifying selection	49.1799
Sh_Ss02J0139038.t1	ShAP2-23	Sh_Ss07I0288124.t1	ShAP2-53	Segmental	0.29552	0.76363	0.386994	1041	191.083	123.917	Purifying selection	62.5926
Sh_Ss01C0041559.t1	ShAP2-2	Sh_Ss02H0125156.t1	ShAP2-16	Segmental	0.225001	0.582464	0.386291	1713	249.917	173.083	Purifying selection	47.743
Sh_So02A0094221.t1	ShAP2-17	Sh_So07C0272850.t1	ShAP2-46	Segmental	0.269854	0.700336	0.38532	1128	192.833	126.167	Purifying selection	57.4046
Sh_So02A0094221.t1	ShAP2-17	Sh_Ss07D0275185.t1	ShAP2-13	Segmental	0.263859	0.685039	0.385173	1125	188.667	124.333	Purifying selection	56.1507
Sh_So01G0065069.t1	ShAP2-2	Sh_Ss02J0136929.t1	ShAP2-16	Segmental	0.227747	0.591872	0.38479	1767	260.417	180.583	Purifying selection	48.5141
Sh_So02A0094221.t1	ShAP2-17	Sh_So07K0293406.t1	ShAP2-52	Segmental	0.269726	0.701731	0.384373	1128	192.833	126.167	Purifying selection	57.519
Sh_So03C0151847.t1	ShAP2-12	Sh_So03G0168485.t1	ShAP2-25	Segmental	0.00957939	0.025086	0.381863	1197	8.5	7.5	Purifying selection	2.05623
Sh_Ss02H0127356.t1	ShAP2-22	Sh_Ss07I0288124.t1	ShAP2-53	Segmental	0.268587	0.70337	0.381857	1128	191.667	127.333	Purifying selection	57.6533
Sh_Ss10I0021852.t1	ShAP2-41	Sh_So10L0028678.t1	ShAP2-68	Segmental	0.0125576	0.0329298	0.381345	1107	10.5	8.5	Purifying selection	2.69916
Sh_Ss02H0127356.t1	ShAP2-22	Sh_So07A0267707.t1	ShAP2-13	Segmental	0.266786	0.703319	0.379325	1125	190.167	126.833	Purifying selection	57.6491
Sh_Ss10A0000409.t1	ShAP2-64	Sh_Ss10I0020547.t1	ShAP2-64	Segmental	0.0101995	0.0269208	0.378871	1464	11	10	Purifying selection	2.20662
Sh_So02D0106388.t1	ShAP2-20	Sh_So02F0115836.t1	ShAP2-20	Segmental	0.00894717	0.0236182	0.378825	1356	9	8	Purifying selection	1.93592
Sh_So02D0106388.t1	ShAP2-20	Sh_So02J0137656.t1	ShAP2-20	Segmental	0.00894717	0.0236182	0.378825	1356	9	8	Purifying selection	1.93592
Sh_So02F0115836.t1	ShAP2-20	Sh_So02F0117597.t1	ShAP2-20	Segmental	0.00894717	0.0236182	0.378825	1356	9	8	Purifying selection	1.93592
Sh_So02F0117597.t1	ShAP2-20	Sh_So02J0137656.t1	ShAP2-20	Segmental	0.00894717	0.0236182	0.378825	1356	9	8	Purifying selection	1.93592
Sh_Ss03B0148465.t1	ShAP2-24	Sh_Ss03G0169019.t1	ShAP2-24	Segmental	0.0159708	0.0421869	0.378573	2094	25	21	Purifying selection	3.45794
Sh_Ss10F0013894.t1	ShAP2-41	Sh_So10K0026483.t1	ShAP2-67	Segmental	0.0177957	0.047313	0.376127	1272	17	14	Purifying selection	3.87811
Sh_So07C0272850.t1	ShAP2-46	Sh_Ss07I0288124.t1	ShAP2-53	Segmental	0.00710966	0.0190638	0.372941	1308	7	6	Purifying selection	1.5626
Sh_So02A0094221.t1	ShAP2-17	Sh_So07A0267707.t1	ShAP2-13	Segmental	0.260948	0.710869	0.367083	1125	187	127	Purifying selection	58.268
Sh_Ss01E0058393.t1	ShAP2-11	Sh_So01G0069299.t1	ShAP2-11	Segmental	0.00732458	0.0201059	0.364299	1638	9	8	Purifying selection	1.64803
Sh_Ss10D0008861.t1	ShAP2-41	Sh_So10K0026483.t1	ShAP2-67	Segmental	0.0167225	0.0474466	0.352449	1272	16	14	Purifying selection	3.88907
Sh_So02A0093121.t1	ShAP2-15	Sh_So02B0097639.t3	ShAP2-18	Segmental	0.0198457	0.0563785	0.352009	1371	20	19	Purifying selection	4.62119
Sh_So10H0019347.t1	ShAP2-41	Sh_So10K0026483.t1	ShAP2-67	Segmental	0.0142886	0.0410717	0.347894	1278	13.75	12.25	Purifying selection	3.36653
Sh_So01B0036017.t1	ShAP2-8	Sh_So05B0222760.t1	ShAP2-33	Segmental	0.00948379	0.0278132	0.340982	1248	9	8	Purifying selection	2.27977
Sh_So05A0219867.t1	ShAP2-8	Sh_So05B0222760.t1	ShAP2-33	Segmental	0.00948379	0.0278132	0.340982	1248	9	8	Purifying selection	2.27977
Sh_So03A0144159.t1	ShAP2-12	Sh_So03G0168485.t1	ShAP2-25	Segmental	0.0101505	0.0301717	0.336426	1197	9	9	Purifying selection	2.47309
Sh_Ss06F0247987.t1	ShAP2-36	Sh_So06G0250725.t2	ShAP2-40	Segmental	0.0130585	0.0388899	0.335782	1416	13.8333	13.1667	Purifying selection	3.18769
Sh_So03G0168485.t1	ShAP2-25	Sh_So03I0176506.t1	ShAP2-12	Segmental	0.01024	0.0306078	0.334556	1185	9	9	Purifying selection	2.50884
Sh_Ss10I0021852.t1	ShAP2-41	Sh_So10K0026483.t1	ShAP2-67	Segmental	0.0156664	0.0474466	0.330189	1272	15	14	Purifying selection	3.88907
Sh_So01B0035826.t1	ShAP2-4	Sh_Ss01H0070214.t1	ShAP2-4	Segmental	0.0062571	0.0192885	0.324395	1278	6	6	Purifying selection	1.58102
Sh_Ss01H0070214.t1	ShAP2-4	Sh_So01K0087099.t1	ShAP2-4	Segmental	0.0062571	0.0192885	0.324395	1278	6	6	Purifying selection	1.58102
Sh_Ss01H0070214.t1	ShAP2-4	Sh_So01I0076097.t1	ShAP2-4	Segmental	0.00730504	0.022552	0.323919	1278	7	7	Purifying selection	1.84853
Sh_So09A0311673.t1	ShAP2-38	Sh_So09C0317379.t1	ShAP2-38	Segmental	0.00511773	0.0158568	0.322746	1299	5	5	Purifying selection	1.29974
Sh_So10C0005301.t1	ShAP2-64	Sh_Ss10I0020547.t1	ShAP2-64	Segmental	0.00932703	0.0298277	0.312697	1455	10	11	Purifying selection	2.44489
Sh_So10C0006638.t1	ShAP2-41	Sh_So10L0028678.t1	ShAP2-68	Segmental	0.0101981	0.0328027	0.310893	1104	8.5	8.5	Purifying selection	2.68874
Sh_So10J0024255.t1	ShAP2-41	Sh_So10L0028678.t1	ShAP2-68	Segmental	0.0101981	0.0328027	0.310893	1104	8.5	8.5	Purifying selection	2.68874
Sh_So01F0059719.t1	ShAP2-2	Sh_So01G0065069.t1	ShAP2-2	Segmental	0.00683117	0.0223209	0.306043	2067	10.5	11.5	Purifying selection	1.82958
Sh_So01A0030411.t1	ShAP2-2	Sh_So01F0059719.t1	ShAP2-2	Segmental	0.00683043	0.0223281	0.305911	2067	10.5	11.5	Purifying selection	1.83017
Sh_So01D0048708.t1	ShAP2-2	Sh_So01F0059719.t1	ShAP2-2	Segmental	0.00683043	0.0223281	0.305911	2067	10.5	11.5	Purifying selection	1.83017
Sh_So06B0237242.t3	ShAP2-37	Sh_Ss06F0247946.t3	ShAP2-37	Segmental	0.00903769	0.0301332	0.299925	1413	9.5	10.5	Purifying selection	2.46993
Sh_So03G0168485.t1	ShAP2-25	Sh_So03J0181010.t1	ShAP2-12	Segmental	0.00901419	0.0301885	0.298597	1197	8	9	Purifying selection	2.47447
Sh_So03B0147883.t1	ShAP2-12	Sh_So03G0168485.t1	ShAP2-25	Segmental	0.00900912	0.0302393	0.297928	1197	8	9	Purifying selection	2.47863
Sh_So03G0168485.t1	ShAP2-25	Sh_So03H0172478.t1	ShAP2-12	Segmental	0.00900912	0.0302393	0.297928	1197	8	9	Purifying selection	2.47863
Sh_So10E0010081.t1	ShAP2-64	Sh_So10F0012616.t1	ShAP2-64	Segmental	0.00544714	0.0183817	0.296336	1491	6	7	Purifying selection	1.50669
Sh_Ss10B0002990.t1	ShAP2-64	Sh_So10H0018192.t1	ShAP2-64	Segmental	0.00502629	0.0171173	0.293639	1482	5.5	6.5	Purifying selection	1.40305
Sh_Ss10B0002990.t1	ShAP2-64	Sh_So10J0022903.t1	ShAP2-64	Segmental	0.00502629	0.0171173	0.293639	1482	5.5	6.5	Purifying selection	1.40305
Sh_So06B0237242.t3	ShAP2-37	Sh_So06E0245456.t3	ShAP2-37	Segmental	0.00656973	0.0225052	0.29192	1431	7	8	Purifying selection	1.84469
Sh_Ss03F0164239.t1	ShAP2-25	Sh_So03G0168485.t1	ShAP2-25	Segmental	0.00670895	0.0231041	0.290379	1206	6	7	Purifying selection	1.89378
Sh_Ss03F0163836.t1	ShAP2-25	Sh_So03G0168485.t1	ShAP2-25	Segmental	0.00670895	0.0231041	0.290379	1206	6	7	Purifying selection	1.89378
Sh_Ss07I0288124.t1	ShAP2-53	Sh_So07K0293406.t1	ShAP2-52	Segmental	0.0081281	0.0288112	0.282116	1308	8	9	Purifying selection	2.36158
Sh_So10C0006638.t1	ShAP2-41	Sh_Ss10E0011531.t1	ShAP2-41	Segmental	0.00910175	0.0326316	0.278925	1308	9	10	Purifying selection	2.67472
Sh_Ss10E0011531.t1	ShAP2-41	Sh_So10J0024255.t1	ShAP2-41	Segmental	0.00910175	0.0326316	0.278925	1308	9	10	Purifying selection	2.67472
Sh_So07A0267707.t1	ShAP2-13	Sh_Ss07I0288124.t1	ShAP2-53	Segmental	0.00712413	0.0256093	0.278185	1305	7	8	Purifying selection	2.09912
Sh_Ss03B0148465.t1	ShAP2-24	Sh_So03H0173014.t1	ShAP2-26	Segmental	0.0148712	0.0535514	0.2777	2061	22.9167	26.0833	Purifying selection	4.38946
Sh_Ss03B0148465.t1	ShAP2-24	Sh_So03I0177104.t1	ShAP2-26	Segmental	0.0148712	0.0535514	0.2777	2061	22.9167	26.0833	Purifying selection	4.38946
Sh_So01E0053754.t1	ShAP2-2	Sh_So01G0065069.t1	ShAP2-2	Segmental	0.00617923	0.0223065	0.277015	2067	9.5	11.5	Purifying selection	1.8284
Sh_So01A0030411.t1	ShAP2-2	Sh_So01E0053754.t1	ShAP2-2	Segmental	0.00617856	0.0223137	0.276896	2067	9.5	11.5	Purifying selection	1.82899
Sh_So01D0048708.t1	ShAP2-2	Sh_So01E0053754.t1	ShAP2-2	Segmental	0.00617856	0.0223137	0.276896	2067	9.5	11.5	Purifying selection	1.82899
Sh_So02A0094221.t1	ShAP2-17	Sh_Ss02H0127356.t1	ShAP2-22	Segmental	0.00574001	0.0207926	0.276061	1167	5	6	Purifying selection	1.70431
Sh_Ss10E0011531.t1	ShAP2-41	Sh_So10H0019347.t1	ShAP2-41	Segmental	0.00829454	0.0300876	0.27568	1275	8	9	Purifying selection	2.4662
Sh_So09A0309711.t1	ShAP2-55	Sh_Ss09H0330681.t1	ShAP2-60	Segmental	0.0111908	0.0406682	0.275172	1434	12	14	Purifying selection	3.33346
Sh_So01E0053185.t1	ShAP2-4	Sh_Ss01H0070214.t1	ShAP2-4	Segmental	0.00548499	0.0200625	0.273395	1218	5	6	Purifying selection	1.64447
Sh_So01B0036017.t1	ShAP2-8	Sh_Ss06H0251338.t1	ShAP2-42	Segmental	0.00965333	0.0354676	0.272173	1227	9	10	Purifying selection	2.90718
Sh_So05A0219867.t1	ShAP2-8	Sh_Ss06H0251338.t1	ShAP2-42	Segmental	0.00965333	0.0354676	0.272173	1227	9	10	Purifying selection	2.90718
Sh_Ss10E0011531.t1	ShAP2-41	Sh_So10G0017010.t1	ShAP2-41	Segmental	0.007066	0.026033	0.271425	1308	7	8	Purifying selection	2.13385
Sh_Ss03B0148465.t1	ShAP2-24	Sh_Ss03D0156469.t1	ShAP2-24	Segmental	0.0146899	0.0549119	0.267518	2091	23	27	Purifying selection	4.50097
Sh_So06G0250725.t2	ShAP2-40	Sh_Ss06K0265903.t1	ShAP2-36	Segmental	0.0353859	0.136283	0.259651	1449	37.8333	44.1667	Purifying selection	11.1707
Sh_So02B0097639.t3	ShAP2-18	Sh_So02F0115836.t1	ShAP2-20	Segmental	0.0102242	0.0394528	0.259151	1323	10	13	Purifying selection	3.23384
Sh_So02B0097639.t3	ShAP2-18	Sh_So02J0137656.t1	ShAP2-20	Segmental	0.0102242	0.0394528	0.259151	1323	10	13	Purifying selection	3.23384
Sh_So10E0010081.t1	ShAP2-64	Sh_Ss10I0020547.t1	ShAP2-64	Segmental	0.0083193	0.0323355	0.257281	1467	9	12	Purifying selection	2.65045
Sh_Ss06A0234620.t1	ShAP2-35	Sh_So06K0265859.t1	ShAP2-44	Segmental	0.00645209	0.0253822	0.254198	1686	8	11	Purifying selection	2.0805
Sh_So03D0155873.t1	ShAP2-25	Sh_So03G0168485.t1	ShAP2-25	Segmental	0.00670895	0.0264636	0.253516	1206	6	8	Purifying selection	2.16915
Sh_So03G0168485.t1	ShAP2-25	Sh_Ss03I0174784.t1	ShAP2-25	Segmental	0.00670895	0.0264636	0.253516	1206	6	8	Purifying selection	2.16915
Sh_So03B0147883.t1	ShAP2-12	Sh_Ss03F0164239.t1	ShAP2-25	Segmental	0.0067568	0.0266991	0.253072	1197	6	8	Purifying selection	2.18845
Sh_So03B0147883.t1	ShAP2-12	Sh_Ss03F0163836.t1	ShAP2-25	Segmental	0.0067568	0.0266991	0.253072	1197	6	8	Purifying selection	2.18845
Sh_Ss03F0164239.t1	ShAP2-25	Sh_So03H0172478.t1	ShAP2-12	Segmental	0.0067568	0.0266991	0.253072	1197	6	8	Purifying selection	2.18845
Sh_Ss03F0163836.t1	ShAP2-25	Sh_So03H0172478.t1	ShAP2-12	Segmental	0.0067568	0.0266991	0.253072	1197	6	8	Purifying selection	2.18845
Sh_Ss03F0164239.t1	ShAP2-25	Sh_So03I0176506.t1	ShAP2-12	Segmental	0.00682146	0.0270223	0.252438	1185	6	8	Purifying selection	2.21495
Sh_Ss03F0163836.t1	ShAP2-25	Sh_So03I0176506.t1	ShAP2-12	Segmental	0.00682146	0.0270223	0.252438	1185	6	8	Purifying selection	2.21495
Sh_So09B0312389.t2	ShAP2-1	Sh_Ss09H0330681.t1	ShAP2-60	Segmental	0.00972934	0.0393037	0.247543	1374	10	13	Purifying selection	3.22161
Sh_So01B0036017.t1	ShAP2-8	Sh_Ss06J0259082.t1	ShAP2-8	Segmental	0.00965333	0.0391084	0.246835	1227	9	11	Purifying selection	3.20561
Sh_So05A0219867.t1	ShAP2-8	Sh_Ss06J0259082.t1	ShAP2-8	Segmental	0.00965333	0.0391084	0.246835	1227	9	11	Purifying selection	3.20561
Sh_So10C0006638.t1	ShAP2-41	Sh_So10K0026483.t1	ShAP2-67	Segmental	0.0124916	0.0506379	0.246685	1275	12	15	Purifying selection	4.15065
Sh_So10J0024255.t1	ShAP2-41	Sh_So10K0026483.t1	ShAP2-67	Segmental	0.0124916	0.0506379	0.246685	1275	12	15	Purifying selection	4.15065
Sh_So06G0250725.t2	ShAP2-40	Sh_So06J0262644.t1	ShAP2-36	Segmental	0.0473366	0.193663	0.244428	1425	49.3333	59.6667	Purifying selection	15.874
Sh_So03A0144627.t1	ShAP2-24	Sh_Ss03B0148465.t1	ShAP2-24	Segmental	0.011086	0.0455155	0.243564	2043	17	22	Purifying selection	3.73078
Sh_Ss07D0275185.t1	ShAP2-13	Sh_Ss07I0288124.t1	ShAP2-53	Segmental	0.00610742	0.0255412	0.239121	1305	6	8	Purifying selection	2.09354
Sh_So10G0017010.t1	ShAP2-41	Sh_So10L0028678.t1	ShAP2-68	Segmental	0.00779539	0.0330578	0.235811	1101	6.5	8.5	Purifying selection	2.70966
Sh_Ss01A0029784.t1	ShAP2-4	Sh_So01J0081528.t1	ShAP2-4	Segmental	0.00567305	0.0242871	0.233583	1287	5.5	7.5	Purifying selection	1.99074
Sh_Ss10E0011531.t1	ShAP2-41	Sh_So10L0028678.t1	ShAP2-68	Segmental	0.0113548	0.0489091	0.232161	1107	9.5	12.5	Purifying selection	4.00894
Sh_So06I0258426.t1	ShAP2-36	Sh_So06J0262644.t1	ShAP2-36	Segmental	0.00755139	0.0328492	0.22988	1407	8	11	Purifying selection	2.69256
Sh_Ss03D0156469.t1	ShAP2-24	Sh_So03F0164872.t1	ShAP2-24	Segmental	0.0218653	0.0960476	0.227651	2088	34	46	Purifying selection	7.87276
Sh_Ss10E0011531.t1	ShAP2-41	Sh_So10K0026483.t1	ShAP2-67	Segmental	0.0146142	0.0651094	0.224457	1272	14	19	Purifying selection	5.33683
Sh_So03B0147883.t1	ShAP2-12	Sh_So03D0155873.t1	ShAP2-25	Segmental	0.0067568	0.0301044	0.224446	1197	6	9	Purifying selection	2.46757
Sh_So03B0147883.t1	ShAP2-12	Sh_Ss03I0174784.t1	ShAP2-25	Segmental	0.0067568	0.0301044	0.224446	1197	6	9	Purifying selection	2.46757
Sh_So03D0155873.t1	ShAP2-25	Sh_So03H0172478.t1	ShAP2-12	Segmental	0.0067568	0.0301044	0.224446	1197	6	9	Purifying selection	2.46757
Sh_So03H0172478.t1	ShAP2-12	Sh_Ss03I0174784.t1	ShAP2-25	Segmental	0.0067568	0.0301044	0.224446	1197	6	9	Purifying selection	2.46757
Sh_So06A0234672.t1	ShAP2-36	Sh_Ss06F0247987.t1	ShAP2-36	Segmental	0.00628605	0.0282453	0.222552	1479	7	10	Purifying selection	2.31519
Sh_Ss06F0247987.t1	ShAP2-36	Sh_So06K0263924.t1	ShAP2-36	Segmental	0.00628605	0.0282453	0.222552	1479	7	10	Purifying selection	2.31519
Sh_Ss10B0002990.t1	ShAP2-64	Sh_Ss10I0020547.t1	ShAP2-64	Segmental	0.00647902	0.0296069	0.218835	1464	7	11	Purifying selection	2.42679
Sh_So01J0084347.t1	ShAP2-8	Sh_Ss06H0251338.t1	ShAP2-42	Segmental	0.00539571	0.0249726	0.216065	1215	5	7	Purifying selection	2.04693
Sh_So05B0222760.t1	ShAP2-33	Sh_So05C0225325.t1	ShAP2-8	Segmental	0.00532531	0.0247299	0.215339	1230	5	7	Purifying selection	2.02704
Sh_So03A0144159.t1	ShAP2-12	Sh_Ss03F0164239.t1	ShAP2-25	Segmental	0.00563066	0.0266399	0.211362	1197	5	8	Purifying selection	2.1836
Sh_So03A0144159.t1	ShAP2-12	Sh_Ss03F0163836.t1	ShAP2-25	Segmental	0.00563066	0.0266399	0.211362	1197	5	8	Purifying selection	2.1836
Sh_Ss03D0156469.t1	ShAP2-24	Sh_Ss03G0169019.t1	ShAP2-24	Segmental	0.0212051	0.100639	0.210704	2088	33	48	Purifying selection	8.24912
Sh_Ss03D0156469.t1	ShAP2-24	Sh_So03H0173014.t1	ShAP2-26	Segmental	0.0228335	0.109261	0.208981	2055	34.9167	51.0833	Purifying selection	8.95583
Sh_Ss03D0156469.t1	ShAP2-24	Sh_So03I0177104.t1	ShAP2-26	Segmental	0.0228335	0.109261	0.208981	2055	34.9167	51.0833	Purifying selection	8.95583
Sh_Ss06F0247946.t3	ShAP2-37	Sh_Ss06I0258368.t1	ShAP2-43	Segmental	0.00502683	0.0241227	0.208386	1335	5	8	Purifying selection	1.97727
Sh_Ss06F0247946.t3	ShAP2-37	Sh_Ss06I0258221.t1	ShAP2-43	Segmental	0.00502683	0.0241227	0.208386	1335	5	8	Purifying selection	1.97727
Sh_So06B0237272.t1	ShAP2-36	Sh_So06J0262644.t1	ShAP2-36	Segmental	0.0153625	0.0737251	0.208375	1434	16.5	24.5	Purifying selection	6.04304
Sh_So06D0242545.t1	ShAP2-36	Sh_So06J0262644.t1	ShAP2-36	Segmental	0.0153625	0.0737251	0.208375	1434	16.5	24.5	Purifying selection	6.04304
Sh_So06J0262644.t1	ShAP2-36	Sh_So06K0265503.t1	ShAP2-36	Segmental	0.0153625	0.0737251	0.208375	1434	16.5	24.5	Purifying selection	6.04304
Sh_So06H0254559.t1	ShAP2-36	Sh_So06J0262644.t1	ShAP2-36	Segmental	0.0125468	0.0611671	0.205123	1434	13.5	20.5	Purifying selection	5.0137
Sh_So10G0017010.t1	ShAP2-41	Sh_So10K0026483.t1	ShAP2-67	Segmental	0.0104114	0.0508957	0.204564	1272	10	15	Purifying selection	4.17178
Sh_So06B0237272.t1	ShAP2-36	Sh_So06G0250725.t2	ShAP2-40	Segmental	0.0226779	0.112539	0.201511	1413	23.8333	36.1667	Purifying selection	9.22453
Sh_So06D0242545.t1	ShAP2-36	Sh_So06G0250725.t2	ShAP2-40	Segmental	0.0226779	0.112539	0.201511	1413	23.8333	36.1667	Purifying selection	9.22453
Sh_Ss01C0041559.t1	ShAP2-2	Sh_So01F0059719.t1	ShAP2-2	Segmental	0.00569581	0.0292179	0.194942	2004	8.5	14.5	Purifying selection	2.39491
Sh_Ss06J0259082.t1	ShAP2-8	Sh_Sotig0336242.t1	ShAP2-70	Segmental	0.00754452	0.0395538	0.190741	1218	7	11	Purifying selection	3.24211
Sh_So01J0084347.t1	ShAP2-8	Sh_Ss06J0259082.t1	ShAP2-8	Segmental	0.00539571	0.028609	0.188602	1215	5	8	Purifying selection	2.345
Sh_So06B0237272.t1	ShAP2-36	Sh_So06I0258426.t1	ShAP2-36	Segmental	0.00845609	0.0451038	0.187481	1413	9	15	Purifying selection	3.69703
Sh_So06D0242545.t1	ShAP2-36	Sh_So06I0258426.t1	ShAP2-36	Segmental	0.00845609	0.0451038	0.187481	1413	9	15	Purifying selection	3.69703
Sh_So06I0258426.t1	ShAP2-36	Sh_So06K0265503.t1	ShAP2-36	Segmental	0.00845609	0.0451038	0.187481	1413	9	15	Purifying selection	3.69703
Sh_So03A0144159.t1	ShAP2-12	Sh_So03D0155873.t1	ShAP2-25	Segmental	0.00563066	0.0300374	0.187455	1197	5	9	Purifying selection	2.46208
Sh_So03A0144159.t1	ShAP2-12	Sh_Ss03I0174784.t1	ShAP2-25	Segmental	0.00563066	0.0300374	0.187455	1197	5	9	Purifying selection	2.46208
Sh_So03D0155873.t1	ShAP2-25	Sh_So03I0176506.t1	ShAP2-12	Segmental	0.00568023	0.0304696	0.186423	1185	5	9	Purifying selection	2.49751
Sh_Ss03I0174784.t1	ShAP2-25	Sh_So03I0176506.t1	ShAP2-12	Segmental	0.00568023	0.0304696	0.186423	1185	5	9	Purifying selection	2.49751
Sh_So06E0245456.t3	ShAP2-37	Sh_Ss06I0258368.t1	ShAP2-43	Segmental	0.0060586	0.0336105	0.180259	1329	6	11	Purifying selection	2.75496
Sh_So06E0245456.t3	ShAP2-37	Sh_Ss06I0258221.t1	ShAP2-43	Segmental	0.0060586	0.0336105	0.180259	1329	6	11	Purifying selection	2.75496
Sh_So03C0151847.t1	ShAP2-12	Sh_Ss03F0164239.t1	ShAP2-25	Segmental	0.00506379	0.0283682	0.178502	1197	4.5	8.5	Purifying selection	2.32526
Sh_So03C0151847.t1	ShAP2-12	Sh_Ss03F0163836.t1	ShAP2-25	Segmental	0.00506379	0.0283682	0.178502	1197	4.5	8.5	Purifying selection	2.32526
Sh_So03A0144627.t1	ShAP2-24	Sh_Ss03D0156469.t1	ShAP2-24	Segmental	0.0177319	0.101247	0.175135	2037	27	47	Purifying selection	8.29892
Sh_So06J0262644.t1	ShAP2-36	Sh_Ss06K0265903.t1	ShAP2-36	Segmental	0.0106747	0.0611671	0.174517	1434	11.5	20.5	Purifying selection	5.0137
Sh_Ss01C0041559.t1	ShAP2-2	Sh_So01E0053754.t1	ShAP2-2	Segmental	0.00502458	0.0291983	0.172085	2004	7.5	14.5	Purifying selection	2.3933
Sh_So10H0018192.t1	ShAP2-64	Sh_Ss10I0020547.t1	ShAP2-64	Segmental	0.00555301	0.0323065	0.171885	1464	6	12	Purifying selection	2.64807
Sh_Ss10I0020547.t1	ShAP2-64	Sh_So10J0022903.t1	ShAP2-64	Segmental	0.00555301	0.0323065	0.171885	1464	6	12	Purifying selection	2.64807
Sh_So06E0245456.t3	ShAP2-37	Sh_Ss06F0247946.t3	ShAP2-37	Segmental	0.00806715	0.04775	0.168946	1416	8.5	16.5	Purifying selection	3.91393
Sh_So05C0225325.t1	ShAP2-8	Sh_Ss06H0251338.t1	ShAP2-42	Segmental	0.00542155	0.0324472	0.167088	1209	5	9	Purifying selection	2.65961
Sh_So04B0191568.t1	ShAP2-28	Sh_So04C0194994.t1	ShAP2-28	Segmental	0.00521005	0.0318406	0.163629	2022	8	15	Purifying selection	2.60989
Sh_So06A0234672.t1	ShAP2-36	Sh_So06B0237272.t1	ShAP2-36	Segmental	0.0156316	0.0965915	0.161832	1452	17	32	Purifying selection	7.91733
Sh_So06A0234672.t1	ShAP2-36	Sh_So06D0242545.t1	ShAP2-36	Segmental	0.0156316	0.0965915	0.161832	1452	17	32	Purifying selection	7.91733
Sh_So06A0234672.t1	ShAP2-36	Sh_So06K0265503.t1	ShAP2-36	Segmental	0.0156316	0.0965915	0.161832	1452	17	32	Purifying selection	7.91733
Sh_So06B0237272.t1	ShAP2-36	Sh_So06K0263924.t1	ShAP2-36	Segmental	0.0156316	0.0965915	0.161832	1452	17	32	Purifying selection	7.91733
Sh_So06D0242545.t1	ShAP2-36	Sh_So06K0263924.t1	ShAP2-36	Segmental	0.0156316	0.0965915	0.161832	1452	17	32	Purifying selection	7.91733
Sh_So06K0263924.t1	ShAP2-36	Sh_So06K0265503.t1	ShAP2-36	Segmental	0.0156316	0.0965915	0.161832	1452	17	32	Purifying selection	7.91733
Sh_So06C0239949.t1	ShAP2-36	Sh_So06J0262644.t1	ShAP2-36	Segmental	0.0259052	0.161276	0.160627	1428	27.5	50.5	Purifying selection	13.2193
Sh_So03C0151847.t1	ShAP2-12	Sh_So03D0155873.t1	ShAP2-25	Segmental	0.00506379	0.0317773	0.159352	1197	4.5	9.5	Purifying selection	2.6047
Sh_So03C0151847.t1	ShAP2-12	Sh_Ss03I0174784.t1	ShAP2-25	Segmental	0.00506379	0.0317773	0.159352	1197	4.5	9.5	Purifying selection	2.6047
Sh_So06G0250725.t2	ShAP2-40	Sh_So06H0254559.t1	ShAP2-36	Segmental	0.0226797	0.143342	0.158221	1413	23.8333	45.1667	Purifying selection	11.7494
Sh_So06A0234672.t1	ShAP2-36	Sh_So06J0262644.t1	ShAP2-36	Segmental	0.0268728	0.171857	0.156367	1428	28.5	53.5	Purifying selection	14.0866
Sh_So06J0262644.t1	ShAP2-36	Sh_So06K0263924.t1	ShAP2-36	Segmental	0.0268728	0.171857	0.156367	1428	28.5	53.5	Purifying selection	14.0866
Sh_So06G0250725.t2	ShAP2-40	Sh_So06I0258426.t1	ShAP2-36	Segmental	0.0254366	0.163281	0.155784	1368	25.8333	49.1667	Purifying selection	13.3837
Sh_Ss06F0247987.t1	ShAP2-36	Sh_So06J0262644.t1	ShAP2-36	Segmental	0.0259134	0.168255	0.154012	1428	27.5	52.5	Purifying selection	13.7914
Sh_So05C0225325.t1	ShAP2-8	Sh_Ss06J0259082.t1	ShAP2-8	Segmental	0.00542155	0.0361407	0.150012	1209	5	10	Purifying selection	2.96235
Sh_So06B0237272.t1	ShAP2-36	Sh_So06C0239949.t1	ShAP2-36	Segmental	0.0146985	0.0999208	0.147101	1452	16	33	Purifying selection	8.19023
Sh_So06C0239949.t1	ShAP2-36	Sh_So06D0242545.t1	ShAP2-36	Segmental	0.0146985	0.0999208	0.147101	1452	16	33	Purifying selection	8.19023
Sh_So06C0239949.t1	ShAP2-36	Sh_So06K0265503.t1	ShAP2-36	Segmental	0.0146985	0.0999208	0.147101	1452	16	33	Purifying selection	8.19023
Sh_So06I0258426.t1	ShAP2-36	Sh_Ss06K0265903.t1	ShAP2-36	Segmental	0.00751239	0.051315	0.146398	1413	8	17	Purifying selection	4.20614
Sh_So10G0016305.t1	ShAP2-28	Sh_So04C0194994.t1	ShAP2-28	Segmental	0.00581962	0.0400235	0.145405	2040	9	19	Purifying selection	3.28062
Sh_Ss06F0247987.t1	ShAP2-36	Sh_Ss06K0265903.t1	ShAP2-36	Segmental	0.0146985	0.103167	0.142473	1452	16	34	Purifying selection	8.45628
Sh_So06B0237272.t1	ShAP2-36	Sh_Ss06F0247987.t1	ShAP2-36	Segmental	0.0156256	0.109729	0.142402	1452	17	36	Purifying selection	8.99416
Sh_So06D0242545.t1	ShAP2-36	Sh_Ss06F0247987.t1	ShAP2-36	Segmental	0.0156256	0.109729	0.142402	1452	17	36	Purifying selection	8.99416
Sh_Ss06F0247987.t1	ShAP2-36	Sh_So06K0265503.t1	ShAP2-36	Segmental	0.0156256	0.109729	0.142402	1452	17	36	Purifying selection	8.99416
Sh_So06C0239949.t1	ShAP2-36	Sh_Ss06K0265903.t1	ShAP2-36	Segmental	0.0146996	0.1064	0.138155	1452	16	35	Purifying selection	8.72128
Sh_So06H0254559.t1	ShAP2-36	Sh_So06I0258426.t1	ShAP2-36	Segmental	0.00751239	0.0544457	0.13798	1413	8	18	Purifying selection	4.46276
Sh_So06A0234672.t1	ShAP2-36	Sh_Ss06K0265903.t1	ShAP2-36	Segmental	0.0156327	0.116144	0.134598	1452	17	38	Purifying selection	9.52001
Sh_So06K0263924.t1	ShAP2-36	Sh_Ss06K0265903.t1	ShAP2-36	Segmental	0.0156327	0.116144	0.134598	1452	17	38	Purifying selection	9.52001
Sh_Ss06F0247987.t1	ShAP2-36	Sh_So06H0254559.t1	ShAP2-36	Segmental	0.0146985	0.112989	0.130087	1452	16	37	Purifying selection	9.26143
Sh_So06C0239949.t1	ShAP2-36	Sh_So06I0258426.t1	ShAP2-36	Segmental	0.0170907	0.134222	0.127332	1407	18	42	Purifying selection	11.0018
Sh_So06C0239949.t1	ShAP2-36	Sh_So06H0254559.t1	ShAP2-36	Segmental	0.0146996	0.116263	0.126434	1452	16	38	Purifying selection	9.52974
Sh_So06A0234672.t1	ShAP2-36	Sh_So06I0258426.t1	ShAP2-36	Segmental	0.0180574	0.144639	0.124845	1407	19	45	Purifying selection	11.8556
Sh_So06I0258426.t1	ShAP2-36	Sh_So06K0263924.t1	ShAP2-36	Segmental	0.0180574	0.144639	0.124845	1407	19	45	Purifying selection	11.8556
Sh_So06A0234672.t1	ShAP2-36	Sh_So06H0254559.t1	ShAP2-36	Segmental	0.0156327	0.126128	0.123944	1452	17	41	Purifying selection	10.3383
Sh_So06H0254559.t1	ShAP2-36	Sh_So06K0263924.t1	ShAP2-36	Segmental	0.0156327	0.126128	0.123944	1452	17	41	Purifying selection	10.3383
Sh_Ss06F0247987.t1	ShAP2-36	Sh_So06I0258426.t1	ShAP2-36	Segmental	0.0151724	0.144794	0.104786	1407	16	45	Purifying selection	11.8684
