# Supplementary material for: Genomic and functional insights into the AP2 transcription factor family reveal a key orchestrator of drought adaptation in cultivated sugarcane
Source: Research Square preprint supplement (doi:10.21203/rs.3.rs-8306373/v1), 2025-12-26
Supplement: Supplementary file 3 [file a82b4b44061067dac6f0f3e7.xlsx]

## Sheet: 211TABLE SI_phsic
Table S1. List of the 211 ShAP2 genes identified in Saccharum hybrid
No.	Sequence ID	Gene name	Number of Amino Acid	Molecular Weight (Da)	Theoretical pI	Instability Index	Aliphatic Index	Grand Average of Hydropathicity	Classification
1	Sh_So09B0312389.t2	ShAP2-1	473	51427.9	6.43	60.38	58.52	-0.67	euAP2
2	Sh_Ss01A0030413.t1	ShAP2-2.1	694	72843.7	8.94	55.3	61.69	-0.448	euANT
3	Sh_So01A0030411.t1	ShAP2-2.2	693	72851.7	9.05	54.72	61.36	-0.462	euANT
4	Sh_So01C0046374.t1	ShAP2-2.3	693	72867.7	9.05	54.16	61.92	-0.455	euANT
5	Sh_So01D0048708.t1	ShAP2-2.4	693	72851.7	9.05	54.72	61.36	-0.462	euANT
6	Sh_So01E0053754.t1	ShAP2-2.5	689	72376.3	9.01	53.94	63.13	-0.425	euANT
7	Sh_So01F0059719.t1	ShAP2-2.6	689	72406.3	9.01	53.88	63.13	-0.426	euANT
8	Sh_So01G0065069.t1	ShAP2-2.7	694	72908.8	9.05	54	61.97	-0.451	euANT
9	Sh_Ss01C0041559.t1	ShAP2-2.8	673	70829.4	9.01	53.35	61.29	-0.459	euANT
10	Sh_Ss01A0031173.t1	ShAP2-3.1	536	56911	8.7	67.35	65.35	-0.355	euAP2
11	Sh_Ss02F0115175.t1	ShAP2-3.2	538	57056.1	8.36	67.05	64.94	-0.353	euAP2
12	Sh_Ss02H0126639.t1	ShAP2-3.3	538	57056.1	8.36	67.05	64.94	-0.353	euAP2
13	Sh_Sstig0338847.t1	ShAP2-3.4	536	56911	8.7	67.35	65.35	-0.355	euAP2
14	Sh_Indtig0346868.t1	ShAP2-3.5	416	45698.6	6.27	67.06	54.25	-0.655	euAP2
15	Sh_Ss01A0029784.t1	ShAP2-4.1	429	47171.5	6.81	65.7	54.87	-0.648	euAP2
16	Sh_So01A0029773.t1	ShAP2-4.2	431	47417.7	6.57	66.33	54.39	-0.661	euAP2
17	Sh_So01B0035826.t1	ShAP2-4.3	426	46798.8	6.38	65.88	53.9	-0.657	euAP2
18	Sh_So01C0043513.t1	ShAP2-4.4	431	47417.7	6.57	66.33	54.39	-0.661	euAP2
19	Sh_So01C0044598.t1	ShAP2-4.5	416	45698.6	6.27	67.06	54.25	-0.655	euAP2
20	Sh_So01D0046960.t1	ShAP2-4.6	416	45698.6	6.27	67.06	54.25	-0.655	euAP2
21	Sh_So01E0053177.t1	ShAP2-4.7	431	47417.7	6.57	66.33	54.39	-0.661	euAP2
22	Sh_So01E0053185.t1	ShAP2-4.8	406	44230.9	6.32	62.57	53.92	-0.62	euAP2
23	Sh_So01F0059317.t1	ShAP2-4.9	416	45684.6	6.27	66.7	54.01	-0.656	euAP2
24	Sh_So01I0076097.t1	ShAP2-4.10	426	46802.8	6.38	64.97	53.9	-0.655	euAP2
25	Sh_So01J0081528.t1	ShAP2-4.11	431	47416.7	7.15	65.88	54.39	-0.662	euAP2
26	Sh_So01K0087099.t1	ShAP2-4.12	426	46798.8	6.38	65.88	53.9	-0.657	euAP2
27	Sh_So01K0087102.t1	ShAP2-4.13	426	46798.8	6.38	65.88	53.9	-0.657	euAP2
28	Sh_Ss01H0070214.t1	ShAP2-4.14	426	46793.8	6.57	65.58	54.13	-0.666	euAP2
29	Sh_So01A0034954.t1	ShAP2-5.1	560	59579.2	6.89	52.96	58.34	-0.509	euANT
30	Sh_So01H0075256.t1	ShAP2-5.2	560	59579.2	6.89	52.96	58.34	-0.509	euANT
31	Sh_Sotig0340628.t1	ShAP2-5.3	558	59531.3	6.87	53.73	59.96	-0.49	euANT
32	Sh_So01A0034078.t1	ShAP2-6.1	425	45650.2	8.6	48.09	69.48	-0.422	euANT
33	Sh_So01B0039287.t1	ShAP2-6.2	425	45604.2	8.6	46.85	69.72	-0.415	euANT
34	Sh_So01C0044873.t1	ShAP2-6.3	425	45657.2	8.59	49.29	68.56	-0.428	euANT
35	Sh_So01E0057294.t1	ShAP2-6.4	426	45705.2	8.4	47.53	68.64	-0.42	euANT
36	Sh_So01F0063080.t1	ShAP2-6.5	425	45714.2	8.59	47.87	68.56	-0.435	euANT
37	Sh_So01G0068899.t1	ShAP2-6.6	425	45604.2	8.6	46.85	69.72	-0.415	euANT
38	Sh_So01I0079867.t1	ShAP2-6.7	425	45714.2	8.59	47.87	68.56	-0.435	euANT
39	Sh_So01I0079871.t1	ShAP2-6.8	425	45657.2	8.59	49.29	68.56	-0.428	euANT
40	Sh_So01B0040202.t1	ShAP2-7.1	520	55182.1	6.22	56.41	58.31	-0.504	euANT
41	Sh_So01D0052028.t1	ShAP2-7.2	523	55407.6	6.24	58.28	59.48	-0.482	euANT
42	Sh_So01F0063847.t1	ShAP2-7.3	520	55182.1	6.22	56.41	58.31	-0.504	euANT
43	Sh_So01I0080775.t1	ShAP2-7.4	526	55892.9	6.22	56.83	58.19	-0.517	euANT
44	Sh_So05C0225325.t1	ShAP2-8.1	411	45143.8	4.78	64.48	62.8	-0.626	basalANT
45	Sh_So01B0036017.t1	ShAP2-8.2	416	45777.6	4.9	60.71	62.28	-0.651	basalANT
46	Sh_So01J0084347.t1	ShAP2-8.3	412	45299	4.76	65.47	62.4	-0.641	basalANT
47	Sh_So05A0219867.t1	ShAP2-8.4	416	45777.6	4.9	60.71	62.28	-0.651	basalANT
48	Sh_Ss06J0259082.t1	ShAP2-8.5	409	44939.6	4.85	65.58	60.46	-0.673	basalANT
49	Sh_Ss01D0052059.t1	ShAP2-9	549	58118.4	6.49	56.95	58.25	-0.502	euANT
50	Sh_So01D0050239.t1	ShAP2-10	427	45374.7	8.57	61.59	65.11	-0.38	euAP2
51	Sh_So01G0069299.t1	ShAP2-11.1	553	58608.2	7.68	53.55	58.43	-0.489	euANT
52	Sh_Ss01E0058393.t1	ShAP2-11.2	555	58803.2	7.14	55.28	56.09	-0.528	euANT
53	Sh_So03I0176506.t1	ShAP2-12.1	415	45627.4	9.31	54.93	65.52	-0.635	basalANT
54	Sh_So01F0063789.t1	ShAP2-12.2	415	45627.4	9.31	54.93	65.52	-0.635	basalANT
55	Sh_So03A0144159.t1	ShAP2-12.3	419	46194.1	9.4	52.53	66.75	-0.631	basalANT
56	Sh_So03B0147883.t1	ShAP2-12.4	419	46294.2	9.35	52.73	66.52	-0.632	basalANT
57	Sh_So03C0151847.t1	ShAP2-12.5	419	46048.9	9.29	53.39	66.99	-0.612	basalANT
58	Sh_So03H0172478.t1	ShAP2-12.6	419	46294.2	9.35	52.73	66.52	-0.632	basalANT
59	Sh_So03J0181010.t1	ShAP2-12.7	419	46135	9.35	53.45	66.75	-0.624	basalANT
60	Sh_So07H0284923.t1	ShAP2-13.1	487	53137.8	6.03	68.71	56.43	-0.668	basalANT
61	Sh_So01G0069130.t1	ShAP2-13.2	493	53896.6	5.71	68.26	59.29	-0.667	basalANT
62	Sh_So07A0267707.t1	ShAP2-13.3	485	53030.7	5.96	69.32	57.26	-0.663	basalANT
63	Sh_So07G0282914.t1	ShAP2-13.4	487	53168.9	5.88	69.01	55.4	-0.654	basalANT
64	Sh_Ss07D0275185.t1	ShAP2-13.5	498	54424.2	5.88	68.77	57.53	-0.679	basalANT
65	Sh_So01H0073214.t1	ShAP2-14	1647	178840	6.27	54.48	66.55	-0.458	euANT
66	Sh_So02A0093121.t1	ShAP2-15	481	51422.6	7.63	65.46	65.26	-0.406	euAP2
67	Sh_So02F0114567.t1	ShAP2-16.1	630	65718.5	6.64	42.5	63.49	-0.398	euANT
68	Sh_So02A0092513.t1	ShAP2-16.2	633	65903.7	6.64	42.1	63.36	-0.391	euANT
69	Sh_So02B0097053.t1	ShAP2-16.3	633	65934.7	6.64	42.15	63.36	-0.394	euANT
70	Sh_So02C0101655.t1	ShAP2-16.4	660	68944	6.92	41.19	61.65	-0.42	euANT
71	Sh_So02D0105737.t1	ShAP2-16.5	647	67677.7	7	42.58	61.67	-0.423	euANT
72	Sh_So02E0109925.t1	ShAP2-16.6	633	65903.7	6.64	42.1	63.36	-0.391	euANT
73	Sh_Ss02H0125156.t1	ShAP2-16.7	654	68233.2	6.8	40.55	61.77	-0.415	euANT
74	Sh_Ss02J0136929.t1	ShAP2-16.8	655	68248.3	6.89	39.66	61.83	-0.407	euANT
75	Sh_So02A0094221.t1	ShAP2-17	396	43216.2	9.52	50.77	54.44	-0.684	basalANT
76	Sh_So02B0097639.t3	ShAP2-18.1	545	57758	9.05	67.31	64.5	-0.367	euAP2
77	Sh_So02E0110823.t2	ShAP2-18.2	535	56850.9	9.05	66.56	64.22	-0.382	euAP2
78	Sh_So02G0120026.t1	ShAP2-18.3	546	57978.2	9.15	67.33	64.38	-0.366	euAP2
79	Sh_So02C0102501.t1	ShAP2-19.1	420	45027.4	7.74	69.34	64.79	-0.417	euAP2
80	Sh_So02E0110651.t1	ShAP2-19.2	420	45027.4	7.74	69.34	64.79	-0.417	euAP2
81	Sh_So02F0117597.t1	ShAP2-20.1	461	49490.6	9.22	64.57	64.71	-0.418	euAP2
82	Sh_So02F0115836.t1	ShAP2-20.2	455	48734.6	9.04	62.72	64.73	-0.413	euAP2
83	Sh_So02D0106388.t1	ShAP2-20.3	461	49490.6	9.22	64.57	64.71	-0.418	euAP2
84	Sh_So02J0137656.t1	ShAP2-20.4	455	48734.6	9.04	62.72	64.73	-0.413	euAP2
85	Sh_So02D0106381.t1	ShAP2-21.1	500	52820.3	9	66.33	64.24	-0.377	euAP2
86	Sh_So02H0127032.t1	ShAP2-21.2	500	52820.3	9	66.33	64.24	-0.377	euAP2
87	Sh_Ss02H0127356.t1	ShAP2-22	470	51308.3	9.08	47.8	61.45	-0.598	basalANT
88	Sh_Ss02J0139038.t1	ShAP2-23	360	39204.5	9.31	49.19	53.36	-0.707	basalANT
89	Sh_So03A0144627.t1	ShAP2-24.1	682	71055.4	6.17	36.36	63.17	-0.316	euANT
90	Sh_So03F0164872.t1	ShAP2-24.2	732	76543.7	6.2	35.33	64.58	-0.306	euANT
91	Sh_Ss03B0148465.t1	ShAP2-24.3	699	73137.6	6.21	36.03	63	-0.34	euANT
92	Sh_Ss03D0156469.t1	ShAP2-24.4	699	73112.8	6.21	36.4	63.42	-0.327	euANT
93	Sh_Ss03G0169019.t1	ShAP2-24.5	699	73002.5	6.4	35.02	62.89	-0.343	euANT
94	Sh_Ss03I0174784.t1	ShAP2-25.1	402	43856.2	9.21	52.95	63.78	-0.66	basalANT
95	Sh_So03D0155873.t1	ShAP2-25.2	402	43856.2	9.21	52.95	63.78	-0.66	basalANT
96	Sh_So03G0168485.t1	ShAP2-25.3	402	44040.4	9.21	53.61	63.06	-0.682	basalANT
97	Sh_So03G0168487.t1	ShAP2-25.4	402	44040.4	9.21	53.61	63.06	-0.682	basalANT
98	Sh_Ss03F0163836.t1	ShAP2-25.5	404	44082.4	9.13	53.64	63.47	-0.669	basalANT
99	Sh_Ss03F0164239.t1	ShAP2-25.6	404	44082.4	9.13	53.64	63.47	-0.669	basalANT
100	Sh_So03I0177104.t1	ShAP2-26.1	1139	121094	8.07	58.16	60.28	-0.483	euANT
101	Sh_So03H0173014.t1	ShAP2-26.2	1139	121094	8.07	58.16	60.28	-0.483	euANT
102	Sh_So04B0192329.t1	ShAP2-27.1	386	42306.8	5.24	55.75	65.49	-0.682	euANT
103	Sh_So03K0184611.t1	ShAP2-27.2	386	42308.8	5.3	55.57	65.49	-0.664	euANT
104	Sh_So04A0188868.t1	ShAP2-27.3	386	42292.7	5.24	55.25	65.23	-0.682	euANT
105	Sh_Ss04E0202542.t1	ShAP2-27.4	386	42292.7	5.24	55.25	65.23	-0.682	euANT
106	Sh_Ss04G0209533.t1	ShAP2-27.5	386	42266.7	5.24	56.25	64.22	-0.694	euANT
107	Sh_So04B0191568.t1	ShAP2-28.1	679	71477.9	5.89	49.31	53.18	-0.575	euANT
108	Sh_So04A0188110.t1	ShAP2-28.2	684	71920.4	5.93	51.08	53.79	-0.576	euANT
109	Sh_So04C0194994.t1	ShAP2-28.3	680	71694.2	5.93	50.11	53.96	-0.575	euANT
110	Sh_So10G0016305.t1	ShAP2-28.4	682	71870.4	5.93	50.95	55.09	-0.567	euANT
111	Sh_So04B0190851.t1	ShAP2-29	1505	168188	6.56	47.82	93.07	-0.038	euAP2
112	Sh_So06I0255420.t1	ShAP2-30.1	365	39892.9	5.37	52.13	64.16	-0.78	euANT
113	Sh_So10L0027427.t1	ShAP2-30.2	362	39474.4	5.37	52.82	63.09	-0.796	euANT
114	Sh_Ss04C0195629.t1	ShAP2-30.3	362	39546.5	5.29	52.11	63.62	-0.798	euANT
115	Sh_Ss04D0198981.t1	ShAP2-30.4	362	39532.5	5.3	52.48	63.09	-0.804	euANT
116	Sh_So04G0208887.t1	ShAP2-31.1	691	73073.1	8.17	54.55	58.18	-0.576	euANT
117	Sh_Sotig0348766.t1	ShAP2-31.2	691	73073.1	8.17	54.55	58.18	-0.576	euANT
118	Sh_So05A0221040.t1	ShAP2-32.1	534	56919.3	6.63	42.08	69.85	-0.348	euANT
119	Sh_So05B0223586.t1	ShAP2-32.2	536	57109.5	6.63	41.74	70.13	-0.332	euANT
120	Sh_So05D0228420.t1	ShAP2-32.3	538	57632	6.38	42.54	69.89	-0.361	euANT
121	Sh_So05E0230644.t1	ShAP2-32.4	534	56919.3	6.63	42.08	69.85	-0.348	euANT
122	Sh_So07E0277001.t1	ShAP2-32.5	521	55735.9	6.79	42.67	68.41	-0.402	euANT
123	Sh_So05B0222760.t1	ShAP2-33	1140	124658	5.83	62.92	57.84	-0.774	basalANT
124	Sh_So05C0227391.t1	ShAP2-34.1	633	68637.4	4.9	47.38	59.57	-0.549	euAP2
125	Sh_So05D0229652.t1	ShAP2-34.2	633	68637.4	4.9	47.38	59.57	-0.549	euAP2
126	Sh_Ss06A0234620.t1	ShAP2-35	570	60926.9	9.49	64.8	65.09	-0.519	euAP2
127	Sh_So06K0263924.t1	ShAP2-36.1	493	53055.7	6.02	54.89	61.34	-0.493	euANT
128	Sh_So06K0265503.t1	ShAP2-36.2	486	52282.7	5.98	54.87	59.24	-0.522	euANT
129	Sh_Ss06K0265903.t1	ShAP2-36.3	486	52213.6	5.95	55.58	59.65	-0.512	euANT
130	Sh_So06A0234672.t1	ShAP2-36.4	493	53055.7	6.02	54.89	61.34	-0.493	euANT
131	Sh_So06B0237272.t1	ShAP2-36.5	486	52282.7	5.98	54.87	59.24	-0.522	euANT
132	Sh_So06C0239949.t1	ShAP2-36.6	493	52975.6	5.98	53.61	62.33	-0.475	euANT
133	Sh_So06D0242545.t1	ShAP2-36.7	486	52282.7	5.98	54.87	59.24	-0.522	euANT
134	Sh_So06H0254559.t1	ShAP2-36.8	486	52285.7	5.95	55.66	60.04	-0.508	euANT
135	Sh_So06I0258426.t1	ShAP2-36.9	471	50844.1	5.95	52.8	59.28	-0.533	euANT
136	Sh_So06J0262644.t1	ShAP2-36.10	478	51266.5	5.91	53.72	59.41	-0.506	euANT
137	Sh_Ss06F0247987.t1	ShAP2-36.11	493	53085.7	6.06	54.6	62.54	-0.483	euANT
138	Sh_So06B0237242.t3	ShAP2-37.1	477	50303.5	7.34	56.92	56.29	-0.61	euAP2
139	Sh_So06E0245456.t3	ShAP2-37.2	483	50826.1	6.63	58.89	57.02	-0.596	euAP2
140	Sh_Ss06F0247946.t3	ShAP2-37.3	476	50293.5	7.31	60.37	55.99	-0.623	euAP2
141	Sh_So09B0313864.t1	ShAP2-38.1	433	46815.4	7.78	54.79	62.33	-0.518	basalANT
142	Sh_So09B0314326.t1	ShAP2-38.2	433	46815.4	7.78	54.79	62.33	-0.518	basalANT
143	Sh_So06B0236953.t1	ShAP2-38.3	432	46673.4	8.56	54.84	62.48	-0.506	basalANT
144	Sh_So09A0311673.t1	ShAP2-38.4	433	46742.4	8.75	55.39	62.1	-0.52	basalANT
145	Sh_So09C0317339.t1	ShAP2-38.5	433	46876.6	8.56	56.17	62.56	-0.512	basalANT
146	Sh_So09C0317379.t1	ShAP2-38.6	433	46815.4	7.78	54.79	62.33	-0.518	basalANT
147	Sh_So09D0320168.t1	ShAP2-38.7	433	46815.4	7.78	54.79	62.33	-0.518	basalANT
148	Sh_So09F0325841.t1	ShAP2-38.8	433	46789.4	7.78	55.23	61.43	-0.53	basalANT
149	Sh_Ss09G0329169.t1	ShAP2-38.9	429	46574.2	8.56	54.7	62	-0.533	basalANT
150	Sh_Ss09I0335653.t1	ShAP2-38.10	432	46736.4	8.56	55.45	61.57	-0.532	basalANT
151	Sh_So06D0242466.t2	ShAP2-39.1	473	49678	7.25	58.14	60.25	-0.552	euAP2
152	Sh_So06H0253631.t2	ShAP2-39.2	473	49678	7.25	58.14	60.25	-0.552	euAP2
153	Sh_So06G0250725.t2	ShAP2-40	510	54877.9	6.25	57.6	62.92	-0.46	euANT
154	Sh_Ss10E0011531.t1	ShAP2-41.1	438	47989.4	8.4	57.37	58.49	-0.604	euAP2
155	Sh_So06H0254378.t1	ShAP2-41.2	437	47656	8.4	56.28	57.53	-0.607	euAP2
156	Sh_So10C0006638.t1	ShAP2-41.3	437	47610.9	8.4	56.63	58.42	-0.596	euAP2
157	Sh_So10G0017010.t1	ShAP2-41.4	436	47541.9	8.4	56.12	57.89	-0.601	euAP2
158	Sh_So10H0019347.t1	ShAP2-41.5	428	46588.8	8.44	57.44	57.83	-0.607	euAP2
159	Sh_So10J0024255.t1	ShAP2-41.6	437	47610.9	8.4	56.63	58.42	-0.596	euAP2
160	Sh_Ss10D0008861.t1	ShAP2-41.7	438	47940.3	8.12	55.2	57.17	-0.61	euAP2
161	Sh_Ss10F0013894.t1	ShAP2-41.8	438	47860.2	8.39	55.06	57.4	-0.607	euAP2
162	Sh_Ss10I0021852.t1	ShAP2-41.9	438	47824.2	8.12	56.05	57.4	-0.599	euAP2
163	Sh_Ss06H0251338.t1	ShAP2-42	632	67645.2	5.34	63.26	63.4	-0.552	basalANT
164	Sh_Ss06I0258221.t1	ShAP2-43.1	450	47569.6	6.98	57.77	57.69	-0.623	euAP2
165	Sh_Ss06I0258368.t1	ShAP2-43.2	450	47569.6	6.98	57.77	57.69	-0.623	euAP2
166	Sh_So06K0265859.t1	ShAP2-44	614	66054.9	9.58	65.49	66.94	-0.486	euAP2
167	Sh_So07B0269966.t1	ShAP2-45	1073	119068	5.32	57.4	64.49	-0.669	basalANT
168	Sh_So07C0272850.t1	ShAP2-46	550	59949.2	5.77	70.86	58.67	-0.678	basalANT
169	Sh_So07H0284224.t1	ShAP2-47.1	301	32010.7	7.75	48.72	64.95	-0.593	euANT
170	Sh_So07F0279334.t1	ShAP2-47.2	300	31898.5	6.68	48.31	64.2	-0.608	euANT
171	Sh_So07L0294630.t1	ShAP2-47.3	300	31898.5	6.68	48.31	64.2	-0.608	euANT
172	Sh_Ss07C0272062.t1	ShAP2-47.4	295	31675.4	7.07	46.64	65.29	-0.604	euANT
173	Sh_Ss07D0274362.t1	ShAP2-48	683	72808.7	5.67	58.26	69.82	-0.442	euANT
174	Sh_So07E0278101.t1	ShAP2-49.1	510	52973.6	6.44	48.8	70.12	-0.385	basalANT
175	Sh_So10K0025133.t1	ShAP2-49.2	510	52973.6	6.44	48.8	70.12	-0.385	basalANT
176	Sh_So07F0280037.t1	ShAP2-50.1	683	72804.7	5.9	57.06	69.25	-0.47	euANT
177	Sh_So07G0281951.t1	ShAP2-50.2	682	72836.7	6.02	57.01	69.35	-0.479	euANT
178	Sh_So07K0292590.t1	ShAP2-50.3	683	72804.7	5.9	57.06	69.25	-0.47	euANT
179	Sh_Ss07I0287506.t1	ShAP2-50.4	679	72613.5	5.94	55.95	69.37	-0.497	euANT
180	Sh_Ss07G0283078.t1	ShAP2-51	536	58997.4	5.48	51.95	53.68	-0.612	euAP2
181	Sh_So07H0284924.t1	ShAP2-52.1	499	54876.6	5.42	67.55	58.96	-0.69	basalANT
182	Sh_So07K0293406.t1	ShAP2-52.2	506	55751.6	5.41	67.76	58.91	-0.701	basalANT
183	Sh_Ss07I0288124.t1	ShAP2-53	436	47892.8	5.6	67.1	57.16	-0.679	basalANT
184	Sh_So07J0290675.t1	ShAP2-54	670	71241.8	5.7	57.86	68.43	-0.478	euANT
185	Sh_So09A0309711.t1	ShAP2-55	506	55132.3	6.94	60.11	61.09	-0.611	euAP2
186	Sh_So09B0312379.t1	ShAP2-56.1	476	51619.3	7.36	60.55	62.04	-0.643	euAP2
187	Sh_So09F0324133.t1	ShAP2-56.2	476	51619.3	7.36	60.55	62.04	-0.643	euAP2
188	Sh_So09H0330687.t1	ShAP2-56.3	476	51619.3	7.36	60.55	62.04	-0.643	euAP2
189	Sh_So09I0333962.t1	ShAP2-56.4	476	51619.3	7.36	60.55	62.04	-0.643	euAP2
190	Sh_So01A0034957.t1	ShAP2-57	548	57956.3	7.37	54.19	58.74	-0.502	euANT
191	Sh_So09C0315205.t1	ShAP2-58.1	379	41693.5	6.54	62.01	66.02	-0.639	euAP2
192	Sh_So09E0321935.t1	ShAP2-58.2	379	41693.5	6.54	62.01	66.02	-0.639	euAP2
193	Sh_So09D0318253.t3	ShAP2-59	468	50829.3	6.23	64.03	58.12	-0.683	euAP2
194	Sh_Ss09H0330681.t1	ShAP2-60	480	52234.9	7.06	62.25	58.5	-0.701	euAP2
195	Sh_Ss09H0332419.t1	ShAP2-61	444	48757.7	9.86	57.69	68	-0.442	basalANT
196	Sh_So10A0001852.t1	ShAP2-62	403	44079.5	9.18	66.5	58.98	-0.486	euAP2
197	Sh_So10A0001953.t1	ShAP2-63	437	47240.8	5.55	49.14	55.26	-0.593	euANT
198	Sh_So10E0010081.t1	ShAP2-64.1	498	52078.7	6.65	46.23	69.64	-0.435	basalANT
199	Sh_So10C0005301.t1	ShAP2-64.2	491	51439.9	6.48	49.04	67.47	-0.483	basalANT
200	Sh_So10F0012616.t1	ShAP2-64.3	497	51908.4	6.48	47.62	68.61	-0.449	basalANT
201	Sh_So10H0018192.t1	ShAP2-64.4	494	51677.1	6.33	47.09	68.06	-0.468	basalANT
202	Sh_So10J0022903.t1	ShAP2-64.5	494	51677.1	6.33	47.09	68.06	-0.468	basalANT
203	Sh_Ss10A0000409.t1	ShAP2-64.6	494	51878.3	6.37	47.18	67.85	-0.491	basalANT
204	Sh_Ss10B0002990.t1	ShAP2-64.7	494	51699.2	6.48	47.26	68.85	-0.446	basalANT
205	Sh_Ss10I0020547.t1	ShAP2-64.8	489	51030.4	6.18	48.16	68.96	-0.435	basalANT
206	Sh_So10B0004370.t1	ShAP2-65	466	50402.6	5.92	45.08	58.71	-0.503	euANT
207	Sh_Ss10E0011678.t1	ShAP2-66	420	45205.8	6.03	46.14	57	-0.546	euANT
208	Sh_So10K0026483.t1	ShAP2-67	514	56345.3	8.98	51.74	64.82	-0.446	euAP2
209	Sh_So10L0028678.t1	ShAP2-68	374	41442.4	9.06	64.95	58.29	-0.623	euAP2
210	Sh_Indtig0346582.t1	ShAP2-69	438	47932.9	6.57	50.37	57.35	-0.63	euANT
211	Sh_Sotig0336242.t1	ShAP2-70	518	57044.3	5.83	68.01	58.51	-0.742	basalANT
