# Supplementary material for: Genomic and functional insights into the AP2 transcription factor family reveal a key orchestrator of drought adaptation in cultivated sugarcane
Source: Research Square preprint supplement (doi:10.21203/rs.3.rs-8306373/v1), 2025-12-26
Supplement: Supplementary file 4 [file e6e7d1fafac15e780c7014ad.xlsx]

## Sheet: Sheet1
Table S6. Cis-regulatory elements of the promoter region of the ShAP2 family genes.
Gene id	Gene name	CRE	Sequence	Start	Length	DNA strand	Species	Descriptions	Specific category	Broad category
Sh_So09B0312389.t2	ShAP2-1	AE-box	AGAAACAA	1130	8	-	Arabidopsis thaliana	part of a module for light response	Light responsiveness	Light responsiveness
Sh_So09B0312389.t2	ShAP2-1	TCT-motif	TCTTAC	805	6	-	Arabidopsis thaliana	part of a light responsive element	Light responsiveness	Light responsiveness
Sh_So09B0312389.t2	ShAP2-1	ATCT-motif	AATCTAATCC	436	9	-	Pisum sativum	part of a conserved DNA module involved in light responsiveness	Light responsiveness	Light responsiveness
Sh_So09B0312389.t2	ShAP2-1	TCCC-motif	TCTCCCT	1265	7	-	Spinacia oleracea	part of a light responsive element	Light responsiveness	Light responsiveness
Sh_So09B0312389.t2	ShAP2-1	TCCC-motif	TCTCCCT	1999	7	+	Spinacia oleracea	part of a light responsive element	Light responsiveness	Light responsiveness
Sh_So09B0312389.t2	ShAP2-1	TCCC-motif	TCTCCCT	2121	7	+	Spinacia oleracea	part of a light responsive element	Light responsiveness	Light responsiveness
Sh_So09B0312389.t2	ShAP2-1	Sp1	GGGCGG	2010	6	-	Oryza sativa	light responsive element	Light responsiveness	Light responsiveness
Sh_So09B0312389.t2	ShAP2-1	G-box	CACGAC	2212	6	-	Zea mays	cis-acting regulatory element involved in light responsiveness	Light responsiveness	Light responsiveness
Sh_So09B0312389.t2	ShAP2-1	I-box	gGATAAGGTG	2195	9	+	Zea mays	part of a light responsive element	Light responsiveness	Light responsiveness
Sh_So09B0312389.t2	ShAP2-1	G-box	TACGTG	859	6	+	Arabidopsis thaliana	cis-acting regulatory element involved in light responsiveness	Light responsiveness	Light responsiveness
Sh_So09B0312389.t2	ShAP2-1	TGA-element	AACGAC	2329	6	+	Brassica oleracea	auxin-responsive element	Auxin responsiveness	Hormone responsiveness
Sh_So09B0312389.t2	ShAP2-1	TCA	TCATCTTCAT	272	9	-	Pisum sativum		SA responsiveness	Hormone responsiveness
Sh_So09B0312389.t2	ShAP2-1	ERE	ATTTCATA	881	8	+	Nicotiana glutinos		ETH responsiveness	Hormone responsiveness
Sh_So09B0312389.t2	ShAP2-1	TGACG-motif	TGACG	51	5	+	Hordeum vulgare	cis-acting regulatory element involved in the MeJA-responsiveness	MeJA responsiveness	Hormone responsiveness
Sh_So09B0312389.t2	ShAP2-1	AAGAA-motif	gGTAAAGAAA	2	9	-	Avena sativa		abscisic acid responsiveness	Hormone responsiveness
Sh_So09B0312389.t2	ShAP2-1	AAGAA-motif	GAAAGAA	232	7	+	Avena sativa		abscisic acid responsiveness	Hormone responsiveness
Sh_So09B0312389.t2	ShAP2-1	AAGAA-motif	GAAAGAA	1279	7	+	Avena sativa		abscisic acid responsiveness	Hormone responsiveness
Sh_So09B0312389.t2	ShAP2-1	AAGAA-motif	gGTAAAGAAA	1594	9	+	Avena sativa		abscisic acid responsiveness	Hormone responsiveness
Sh_So09B0312389.t2	ShAP2-1	AAGAA-motif	gGTAAAGAAA	1714	9	-	Avena sativa		abscisic acid responsiveness	Hormone responsiveness
Sh_So09B0312389.t2	ShAP2-1	CGTCA-motif	CGTCA	51	5	-	Hordeum vulgare	cis-acting regulatory element involved in the MeJA-responsiveness	MeJA responsiveness	Hormone responsiveness
Sh_So09B0312389.t2	ShAP2-1	ABRE	ACGTG	860	5	+	Arabidopsis thaliana	cis-acting element involved in the abscisic acid responsiveness	abscisic acid responsiveness	Hormone responsiveness
Sh_So09B0312389.t2	ShAP2-1	ABRE	TACGGTC	2222	7	-	Arabidopsis thaliana	cis-acting element involved in the abscisic acid responsiveness	abscisic acid responsiveness	Hormone responsiveness
Sh_So09B0312389.t2	ShAP2-1	ABRE	AACCCGG	2246	7	-	Arabidopsis thaliana	cis-acting element involved in the abscisic acid responsiveness	abscisic acid responsiveness	Hormone responsiveness
Sh_So09B0312389.t2	ShAP2-1	ABRE4	CACGTA	859	6	-	Zea mays		abscisic acid responsiveness	Hormone responsiveness
Sh_So09B0312389.t2	ShAP2-1	TGA-element	AACGAC	255	6	+	Brassica oleracea	auxin-responsive element	Auxin responsiveness	Hormone responsiveness
Sh_So09B0312389.t2	ShAP2-1	ABRE3a	TACGTG	859	6	+	Zea mays		abscisic acid responsiveness	Hormone responsiveness
Sh_So09B0312389.t2	ShAP2-1	RY-element	CATGCATG	26	8	+	Helianthus annuus	cis-acting regulatory element involved in seed-specific regulation	seed-specific regulation	Development responsiveness
Sh_So09B0312389.t2	ShAP2-1	CCGTCC-box	CCGTCC	2105	6	+	Petroselinum hortense		Meristem specific activation	Development responsiveness
Sh_So09B0312389.t2	ShAP2-1	CAT-box	GCCACT	2230	6	-	Arabidopsis thaliana	cis-acting regulatory element related to meristem expression	Meristem specific activation	Development responsiveness
Sh_So09B0312389.t2	ShAP2-1	WRE3	CCACCT	2015	6	+	Pisum sativum		Wound responsiveness	Stress responsiveness
Sh_So09B0312389.t2	ShAP2-1	LTR	CCGAAA	2070	6	+	Hordeum vulgare	cis-acting element involved in low-temperature responsiveness	low-temperature	Stress responsiveness
Sh_So09B0312389.t2	ShAP2-1	TC-rich repeats	GTTTTCTTAC	1	9	+	Nicotiana tabacum	cis-acting element involved in defense and stress responsiveness	Defense and stress	Stress responsiveness
Sh_So09B0312389.t2	ShAP2-1	STRE	AGGGG	262	5	-	Arabidopsis thaliana		Wound responsiveness	Stress responsiveness
Sh_So09B0312389.t2	ShAP2-1	STRE	AGGGG	501	5	+	Arabidopsis thaliana		Wound responsiveness	Stress responsiveness
Sh_So09B0312389.t2	ShAP2-1	ARE	AAACCA	1948	6	+	Zea mays	cis-acting regulatory element essential for the anaerobic induction	anaerobic induction	Stress responsiveness
Sh_So09B0312389.t2	ShAP2-1	MBS	CAACTG	166	6	-	Arabidopsis thaliana	MYB binding site involved in drought-inducibility	MYB	Transcription factor
Sh_So09B0312389.t2	ShAP2-1	MBS	CAACTG	2177	6	-	Arabidopsis thaliana	MYB binding site involved in drought-inducibility	MYB	Transcription factor
Sh_So09B0312389.t2	ShAP2-1	MBS	CAACTG	2433	6	-	Arabidopsis thaliana	MYB binding site involved in drought-inducibility	MYB	Transcription factor
Sh_So09B0312389.t2	ShAP2-1	Myb	TAACTG	266	6	+	Arabidopsis thaliana		MYB	Transcription factor
Sh_So09B0312389.t2	ShAP2-1	MYB	CAACCA	1158	6	-	Arabidopsis thaliana		MYB	Transcription factor
Sh_So09B0312389.t2	ShAP2-1	Myc	TCTCTTA	1167	7	+	Arabidopsis thaliana		MYC	Transcription factor
Sh_So09B0312389.t2	ShAP2-1	MYB recognition site	CCGTTG	756	6	-	Arabidopsis thaliana		MYB	Transcription factor
Sh_So09B0312389.t2	ShAP2-1	CCAAT-box	CAACGG	756	6	+	Hordeum vulgare	MYBHv1 binding site	MYB	Transcription factor
Sh_So09B0312389.t2	ShAP2-1	W box	TTGACC	2267	6	-	Arabidopsis thaliana		WRKY	Transcription factor
Sh_So09B0312389.t2	ShAP2-1	MYC	CATTTG	737	6	-	Arabidopsis thaliana		MYC	Transcription factor
Sh_So03I0176506.t1	ShAP2-12	ATCT-motif	AATCTAATCC	1998	9	-	Pisum sativum	part of a conserved DNA module involved in light responsiveness	Light responsiveness	Light responsiveness
Sh_So03I0176506.t1	ShAP2-12	Box 4	ATTAAT	2044	6	-	Petroselinum crispum	part of a conserved DNA module involved in light responsiveness	Light responsiveness	Light responsiveness
Sh_So03I0176506.t1	ShAP2-12	Box 4	ATTAAT	452	6	+	Petroselinum crispum	part of a conserved DNA module involved in light responsiveness	Light responsiveness	Light responsiveness
Sh_So03I0176506.t1	ShAP2-12	Box 4	ATTAAT	559	6	+	Petroselinum crispum	part of a conserved DNA module involved in light responsiveness	Light responsiveness	Light responsiveness
Sh_So03I0176506.t1	ShAP2-12	Box 4	ATTAAT	579	6	+	Petroselinum crispum	part of a conserved DNA module involved in light responsiveness	Light responsiveness	Light responsiveness
Sh_So03I0176506.t1	ShAP2-12	Box 4	ATTAAT	1162	6	+	Petroselinum crispum	part of a conserved DNA module involved in light responsiveness	Light responsiveness	Light responsiveness
Sh_So03I0176506.t1	ShAP2-12	Box 4	ATTAAT	1542	6	-	Petroselinum crispum	part of a conserved DNA module involved in light responsiveness	Light responsiveness	Light responsiveness
Sh_So03I0176506.t1	ShAP2-12	Box 4	ATTAAT	2128	6	-	Petroselinum crispum	part of a conserved DNA module involved in light responsiveness	Light responsiveness	Light responsiveness
Sh_So03I0176506.t1	ShAP2-12	G-box	CACGAC	690	6	+	Zea mays	cis-acting regulatory element involved in light responsiveness	Light responsiveness	Light responsiveness
Sh_So03I0176506.t1	ShAP2-12	G-box	CACGTC	745	6	-	Zea mays	cis-acting regulatory element involved in light responsiveness	Light responsiveness	Light responsiveness
Sh_So03I0176506.t1	ShAP2-12	G-box	CACGAC	788	6	+	Zea mays	cis-acting regulatory element involved in light responsiveness	Light responsiveness	Light responsiveness
Sh_So03I0176506.t1	ShAP2-12	TCT-motif	TCTTAC	1627	6	-	Arabidopsis thaliana	part of a light responsive element	Light responsiveness	Light responsiveness
Sh_So03I0176506.t1	ShAP2-12	AE-box	AGAAACAA	526	8	+	Arabidopsis thaliana	part of a module for light response	Light responsiveness	Light responsiveness
Sh_So03I0176506.t1	ShAP2-12	3-AF1 binding site	TAAGAGAGGAA	1547	10	+	Solanum tuberosum	light responsive element	Light responsiveness	Light responsiveness
Sh_So03I0176506.t1	ShAP2-12	G-box	CACGTC	1363	6	-	Zea mays	cis-acting regulatory element involved in light responsiveness	Light responsiveness	Light responsiveness
Sh_So03I0176506.t1	ShAP2-12	G-box	CACGTG	1855	6	-	Arabidopsis thaliana	cis-acting regulatory element involved in light responsiveness	Light responsiveness	Light responsiveness
Sh_So03I0176506.t1	ShAP2-12	G-box	CACGTG	815	6	+	Arabidopsis thaliana	cis-acting regulatory element involved in light responsiveness	Light responsiveness	Light responsiveness
Sh_So03I0176506.t1	ShAP2-12	GT1-motif	GGTTAA	1492	6	-	Arabidopsis thaliana	light responsive element	Light responsiveness	Light responsiveness
Sh_So03I0176506.t1	ShAP2-12	GT1-motif	GGTTAAT	1491	7	-	Avena sativa	light responsive element	Light responsiveness	Light responsiveness
Sh_So03I0176506.t1	ShAP2-12	G-box	TACGTG	1393	6	-	Arabidopsis thaliana	cis-acting regulatory element involved in light responsiveness	Light responsiveness	Light responsiveness
Sh_So03I0176506.t1	ShAP2-12	G-box	TACGTG	1798	6	-	Arabidopsis thaliana	cis-acting regulatory element involved in light responsiveness	Light responsiveness	Light responsiveness
Sh_So03I0176506.t1	ShAP2-12	G-box	TACGTG	1833	6	-	Arabidopsis thaliana	cis-acting regulatory element involved in light responsiveness	Light responsiveness	Light responsiveness
Sh_So03I0176506.t1	ShAP2-12	G-box	TACGTG	184	6	-	Arabidopsis thaliana	cis-acting regulatory element involved in light responsiveness	Light responsiveness	Light responsiveness
Sh_So03I0176506.t1	ShAP2-12	G-box	TACGTG	680	6	-	Arabidopsis thaliana	cis-acting regulatory element involved in light responsiveness	Light responsiveness	Light responsiveness
Sh_So03I0176506.t1	ShAP2-12	ABRE	ACGTG	1364	5	+	Arabidopsis thaliana	cis-acting element involved in the abscisic acid responsiveness	abscisic acid responsiveness	Hormone responsiveness
Sh_So03I0176506.t1	ShAP2-12	ABRE	ACGTG	1393	5	-	Arabidopsis thaliana	cis-acting element involved in the abscisic acid responsiveness	abscisic acid responsiveness	Hormone responsiveness
Sh_So03I0176506.t1	ShAP2-12	ABRE	ACGTG	1798	5	-	Arabidopsis thaliana	cis-acting element involved in the abscisic acid responsiveness	abscisic acid responsiveness	Hormone responsiveness
Sh_So03I0176506.t1	ShAP2-12	ABRE	ACGTG	1833	5	-	Arabidopsis thaliana	cis-acting element involved in the abscisic acid responsiveness	abscisic acid responsiveness	Hormone responsiveness
Sh_So03I0176506.t1	ShAP2-12	ABRE	ACGTG	1856	5	+	Arabidopsis thaliana	cis-acting element involved in the abscisic acid responsiveness	abscisic acid responsiveness	Hormone responsiveness
Sh_So03I0176506.t1	ShAP2-12	ABRE	CGTACGTGCA	182	9	-	Hordeum vulgare	cis-acting element involved in the abscisic acid responsiveness	abscisic acid responsiveness	Hormone responsiveness
Sh_So03I0176506.t1	ShAP2-12	ABRE	ACGTG	184	5	-	Arabidopsis thaliana	cis-acting element involved in the abscisic acid responsiveness	abscisic acid responsiveness	Hormone responsiveness
Sh_So03I0176506.t1	ShAP2-12	ABRE	ACGTG	680	5	-	Arabidopsis thaliana	cis-acting element involved in the abscisic acid responsiveness	abscisic acid responsiveness	Hormone responsiveness
Sh_So03I0176506.t1	ShAP2-12	ABRE	ACGTG	746	5	+	Arabidopsis thaliana	cis-acting element involved in the abscisic acid responsiveness	abscisic acid responsiveness	Hormone responsiveness
Sh_So03I0176506.t1	ShAP2-12	ABRE	GACACGTACGT	791	10	+	Oryza sativa	cis-acting element involved in the abscisic acid responsiveness	abscisic acid responsiveness	Hormone responsiveness
Sh_So03I0176506.t1	ShAP2-12	ABRE	CGCACGTGTC	813	9	+	Hordeum vulgare	cis-acting element involved in the abscisic acid responsiveness	abscisic acid responsiveness	Hormone responsiveness
Sh_So03I0176506.t1	ShAP2-12	ABRE	ACGTG	816	5	+	Arabidopsis thaliana	cis-acting element involved in the abscisic acid responsiveness	abscisic acid responsiveness	Hormone responsiveness
Sh_So03I0176506.t1	ShAP2-12	ABRE4	CACGTA	184	6	+	Zea mays		abscisic acid responsiveness	Hormone responsiveness
Sh_So03I0176506.t1	ShAP2-12	ABRE4	CACGTA	680	6	+	Zea mays		abscisic acid responsiveness	Hormone responsiveness
Sh_So03I0176506.t1	ShAP2-12	TGACG-motif	TGACG	280	5	+	Hordeum vulgare	cis-acting regulatory element involved in the MeJA-responsiveness	MeJA responsiveness	Hormone responsiveness
Sh_So03I0176506.t1	ShAP2-12	TGACG-motif	TGACG	744	5	+	Hordeum vulgare	cis-acting regulatory element involved in the MeJA-responsiveness	MeJA responsiveness	Hormone responsiveness
Sh_So03I0176506.t1	ShAP2-12	TGACG-motif	TGACG	1005	5	-	Hordeum vulgare	cis-acting regulatory element involved in the MeJA-responsiveness	MeJA responsiveness	Hormone responsiveness
Sh_So03I0176506.t1	ShAP2-12	TGACG-motif	TGACG	1198	5	+	Hordeum vulgare	cis-acting regulatory element involved in the MeJA-responsiveness	MeJA responsiveness	Hormone responsiveness
Sh_So03I0176506.t1	ShAP2-12	CGTCA-motif	CGTCA	280	5	-	Hordeum vulgare	cis-acting regulatory element involved in the MeJA-responsiveness	MeJA responsiveness	Hormone responsiveness
Sh_So03I0176506.t1	ShAP2-12	CGTCA-motif	CGTCA	744	5	-	Hordeum vulgare	cis-acting regulatory element involved in the MeJA-responsiveness	MeJA responsiveness	Hormone responsiveness
Sh_So03I0176506.t1	ShAP2-12	CGTCA-motif	CGTCA	1005	5	+	Hordeum vulgare	cis-acting regulatory element involved in the MeJA-responsiveness	MeJA responsiveness	Hormone responsiveness
Sh_So03I0176506.t1	ShAP2-12	CGTCA-motif	CGTCA	1198	5	-	Hordeum vulgare	cis-acting regulatory element involved in the MeJA-responsiveness	MeJA responsiveness	Hormone responsiveness
Sh_So03I0176506.t1	ShAP2-12	F-box	CTATTCTCATT	942	10	-	Lycopersicon esculentum		GA responsiveness	Hormone responsiveness
Sh_So03I0176506.t1	ShAP2-12	ABRE4	CACGTA	1393	6	+	Zea mays		abscisic acid responsiveness	Hormone responsiveness
Sh_So03I0176506.t1	ShAP2-12	ABRE4	CACGTA	1798	6	+	Zea mays		abscisic acid responsiveness	Hormone responsiveness
Sh_So03I0176506.t1	ShAP2-12	ABRE4	CACGTA	1833	6	+	Zea mays		abscisic acid responsiveness	Hormone responsiveness
Sh_So03I0176506.t1	ShAP2-12	ABRE	CACGTG	1855	6	-	Arabidopsis thaliana	cis-acting element involved in the abscisic acid responsiveness	abscisic acid responsiveness	Hormone responsiveness
Sh_So03I0176506.t1	ShAP2-12	ABRE	CACGTG	815	6	+	Arabidopsis thaliana	cis-acting element involved in the abscisic acid responsiveness	abscisic acid responsiveness	Hormone responsiveness
Sh_So03I0176506.t1	ShAP2-12	ABRE	CGCACGTGTC	1853	9	+	Hordeum vulgare	cis-acting element involved in the abscisic acid responsiveness	abscisic acid responsiveness	Hormone responsiveness
Sh_So03I0176506.t1	ShAP2-12	ABRE3a	TACGTG	1393	6	-	Zea mays		abscisic acid responsiveness	Hormone responsiveness
Sh_So03I0176506.t1	ShAP2-12	ABRE3a	TACGTG	1798	6	-	Zea mays		abscisic acid responsiveness	Hormone responsiveness
Sh_So03I0176506.t1	ShAP2-12	ABRE3a	TACGTG	1833	6	-	Zea mays		abscisic acid responsiveness	Hormone responsiveness
Sh_So03I0176506.t1	ShAP2-12	ABRE3a	TACGTG	184	6	-	Zea mays		abscisic acid responsiveness	Hormone responsiveness
Sh_So03I0176506.t1	ShAP2-12	ABRE3a	TACGTG	680	6	-	Zea mays		abscisic acid responsiveness	Hormone responsiveness
Sh_So03I0176506.t1	ShAP2-12	O2-site	GATGACATGG	2100	9	+	Zea mays	cis-acting regulatory element involved in zein metabolism regulation	zein metabolism regulation	Development responsiveness
Sh_So03I0176506.t1	ShAP2-12	CCGTCC-box	CCGTCC	118	6	+	Petroselinum hortense		Meristem specific activation	Development responsiveness
Sh_So03I0176506.t1	ShAP2-12	CCGTCC-box	CCGTCC	2457	6	+	Petroselinum hortense		Meristem specific activation	Development responsiveness
Sh_So03I0176506.t1	ShAP2-12	O2-site	GTTGACGTGA	1392	9	-	Zea mays	cis-acting regulatory element involved in zein metabolism regulation	zein metabolism regulation	Development responsiveness
Sh_So03I0176506.t1	ShAP2-12	STRE	AGGGG	1408	5	+	Arabidopsis thaliana		Wound responsiveness	Stress responsiveness
Sh_So03I0176506.t1	ShAP2-12	STRE	AGGGG	1890	5	-	Arabidopsis thaliana		Wound responsiveness	Stress responsiveness
Sh_So03I0176506.t1	ShAP2-12	TC-rich repeats	GTTTTCTTAC	1192	9	+	Nicotiana tabacum	cis-acting element involved in defense and stress responsiveness	Defense and stress	Stress responsiveness
Sh_So03I0176506.t1	ShAP2-12	STRE	AGGGG	78	5	-	Arabidopsis thaliana		Wound responsiveness	Stress responsiveness
Sh_So03I0176506.t1	ShAP2-12	STRE	AGGGG	201	5	-	Arabidopsis thaliana		Wound responsiveness	Stress responsiveness
Sh_So03I0176506.t1	ShAP2-12	LTR	CCGAAA	1232	6	+	Hordeum vulgare	cis-acting element involved in low-temperature responsiveness	low-temperature	Stress responsiveness
Sh_So03I0176506.t1	ShAP2-12	ARE	AAACCA	1981	6	-	Zea mays	cis-acting regulatory element essential for the anaerobic induction	anaerobic induction	Stress responsiveness
Sh_So03I0176506.t1	ShAP2-12	ARE	AAACCA	971	6	-	Zea mays	cis-acting regulatory element essential for the anaerobic induction	anaerobic induction	Stress responsiveness
Sh_So03I0176506.t1	ShAP2-12	MYB	CAACAG	344	6	-	Arabidopsis thaliana		MYB	Transcription factor
Sh_So03I0176506.t1	ShAP2-12	DRE core	GCCGAC	307	6	+	Arabidopsis thaliana		DRE	Transcription factor
Sh_So03I0176506.t1	ShAP2-12	DRE core	GCCGAC	2275	6	-	Arabidopsis thaliana		DRE	Transcription factor
Sh_So03I0176506.t1	ShAP2-12	MYC	CATGTG	887	6	-	Arabidopsis thaliana		MYC	Transcription factor
Sh_So03I0176506.t1	ShAP2-12	MYC	CATGTG	1008	6	-	Arabidopsis thaliana		MYC	Transcription factor
Sh_So03I0176506.t1	ShAP2-12	Myc	TCTCTTA	1547	7	-	Arabidopsis thaliana		MYC	Transcription factor
Sh_So03I0176506.t1	ShAP2-12	MRE	AACCTAA	1176	7	-	Petroselinum crispum	MYB binding site involved in light responsiveness	MYB	Transcription factor
Sh_So03I0176506.t1	ShAP2-12	MYC	CAATTG	1913	6	-	Arabidopsis thaliana		MYC	Transcription factor
Sh_So03I0176506.t1	ShAP2-12	MYB	TAACCA	1139	6	+	Arabidopsis thaliana		MYB	Transcription factor
Sh_So03I0176506.t1	ShAP2-12	MYB	TAACCA	1493	6	+	Arabidopsis thaliana		MYB	Transcription factor
Sh_So03I0176506.t1	ShAP2-12	MYB	TAACCA	414	6	+	Arabidopsis thaliana		MYB	Transcription factor
Sh_So07H0284923.t1	ShAP2-13	Sp1	GGGCGG	1784	6	-	Oryza sativa	light responsive element	Light responsiveness	Light responsiveness
Sh_So07H0284923.t1	ShAP2-13	G-Box	CACGTT	1889	6	+	Pisum sativum	cis-acting regulatory element involved in light responsiveness	Light responsiveness	Light responsiveness
Sh_So07H0284923.t1	ShAP2-13	I-box	cCATATCCAAT	1805	10	+	Flaveria trinervia	part of a light responsive element	Light responsiveness	Light responsiveness
Sh_So07H0284923.t1	ShAP2-13	G-box	GCCACGTGGA	2003	9	-	Arabidopsis thaliana	cis-acting regulatory element involved in light responsiveness	Light responsiveness	Light responsiveness
Sh_So07H0284923.t1	ShAP2-13	G-box	CACGTC	2418	6	-	Zea mays	cis-acting regulatory element involved in light responsiveness	Light responsiveness	Light responsiveness
Sh_So07H0284923.t1	ShAP2-13	G-box	CACGTC	2455	6	+	Zea mays	cis-acting regulatory element involved in light responsiveness	Light responsiveness	Light responsiveness
Sh_So07H0284923.t1	ShAP2-13	GARE-motif	TCTGTTG	217	7	+	Brassica oleracea	gibberellin-responsive element	GA responsiveness	Hormone responsiveness
Sh_So07H0284923.t1	ShAP2-13	GARE-motif	TCTGTTG	977	7	+	Brassica oleracea	gibberellin-responsive element	GA responsiveness	Hormone responsiveness
Sh_So07H0284923.t1	ShAP2-13	CGTCA-motif	CGTCA	205	5	-	Hordeum vulgare	cis-acting regulatory element involved in the MeJA-responsiveness	MeJA responsiveness	Hormone responsiveness
Sh_So07H0284923.t1	ShAP2-13	CGTCA-motif	CGTCA	965	5	-	Hordeum vulgare	cis-acting regulatory element involved in the MeJA-responsiveness	MeJA responsiveness	Hormone responsiveness
Sh_So07H0284923.t1	ShAP2-13	CGTCA-motif	CGTCA	1587	5	+	Hordeum vulgare	cis-acting regulatory element involved in the MeJA-responsiveness	MeJA responsiveness	Hormone responsiveness
Sh_So07H0284923.t1	ShAP2-13	CGTCA-motif	CGTCA	2117	5	+	Hordeum vulgare	cis-acting regulatory element involved in the MeJA-responsiveness	MeJA responsiveness	Hormone responsiveness
Sh_So07H0284923.t1	ShAP2-13	CGTCA-motif	CGTCA	2457	5	+	Hordeum vulgare	cis-acting regulatory element involved in the MeJA-responsiveness	MeJA responsiveness	Hormone responsiveness
Sh_So07H0284923.t1	ShAP2-13	AAGAA-motif	GAAAGAA	360	7	-	Avena sativa		abscisic acid responsiveness	Hormone responsiveness
Sh_So07H0284923.t1	ShAP2-13	AAGAA-motif	GAAAGAA	1121	7	-	Avena sativa		abscisic acid responsiveness	Hormone responsiveness
Sh_So07H0284923.t1	ShAP2-13	TGACG-motif	TGACG	205	5	+	Hordeum vulgare	cis-acting regulatory element involved in the MeJA-responsiveness	MeJA responsiveness	Hormone responsiveness
Sh_So07H0284923.t1	ShAP2-13	TGACG-motif	TGACG	965	5	+	Hordeum vulgare	cis-acting regulatory element involved in the MeJA-responsiveness	MeJA responsiveness	Hormone responsiveness
Sh_So07H0284923.t1	ShAP2-13	TGACG-motif	TGACG	1587	5	-	Hordeum vulgare	cis-acting regulatory element involved in the MeJA-responsiveness	MeJA responsiveness	Hormone responsiveness
Sh_So07H0284923.t1	ShAP2-13	TGACG-motif	TGACG	2117	5	-	Hordeum vulgare	cis-acting regulatory element involved in the MeJA-responsiveness	MeJA responsiveness	Hormone responsiveness
Sh_So07H0284923.t1	ShAP2-13	TGACG-motif	TGACG	2457	5	-	Hordeum vulgare	cis-acting regulatory element involved in the MeJA-responsiveness	MeJA responsiveness	Hormone responsiveness
Sh_So07H0284923.t1	ShAP2-13	ABRE	ACGTG	1889	5	-	Arabidopsis thaliana	cis-acting element involved in the abscisic acid responsiveness	abscisic acid responsiveness	Hormone responsiveness
Sh_So07H0284923.t1	ShAP2-13	ABRE	GCCGCGTGGC	1970	9	-	Oryza sativa	cis-acting element involved in the abscisic acid responsiveness	abscisic acid responsiveness	Hormone responsiveness
Sh_So07H0284923.t1	ShAP2-13	ABRE	ACGTG	2419	5	+	Arabidopsis thaliana	cis-acting element involved in the abscisic acid responsiveness	abscisic acid responsiveness	Hormone responsiveness
Sh_So07H0284923.t1	ShAP2-13	ABRE	ACGTG	2455	5	-	Arabidopsis thaliana	cis-acting element involved in the abscisic acid responsiveness	abscisic acid responsiveness	Hormone responsiveness
Sh_So07H0284923.t1	ShAP2-13	CCGTCC-box	CCGTCC	793	6	-	Petroselinum hortense		Meristem specific activation	Development responsiveness
Sh_So07H0284923.t1	ShAP2-13	LTR	CCGAAA	1645	6	-	Hordeum vulgare	cis-acting element involved in low-temperature responsiveness	low-temperature	Stress responsiveness
Sh_So07H0284923.t1	ShAP2-13	WRE3	CCACCT	2172	6	+	Pisum sativum		Wound responsiveness	Stress responsiveness
Sh_So07H0284923.t1	ShAP2-13	STRE	AGGGG	73	5	+	Arabidopsis thaliana		Wound responsiveness	Stress responsiveness
Sh_So07H0284923.t1	ShAP2-13	STRE	AGGGG	164	5	+	Arabidopsis thaliana		Wound responsiveness	Stress responsiveness
Sh_So07H0284923.t1	ShAP2-13	STRE	AGGGG	925	5	+	Arabidopsis thaliana		Wound responsiveness	Stress responsiveness
Sh_So07H0284923.t1	ShAP2-13	TC-rich repeats	GTTTTCTTAC	2407	9	-	Nicotiana tabacum	cis-acting element involved in defense and stress responsiveness	Defense and stress	Stress responsiveness
Sh_So07H0284923.t1	ShAP2-13	GC-motif	CCCCCG	613	6	+	Zea mays	enhancer-like element involved in anoxic specific inducibility	anaerobic induction	Stress responsiveness
Sh_So07H0284923.t1	ShAP2-13	GC-motif	CCCCCG	1469	6	+	Zea mays	enhancer-like element involved in anoxic specific inducibility	anaerobic induction	Stress responsiveness
Sh_So07H0284923.t1	ShAP2-13	GC-motif	CCCCCG	2026	6	-	Zea mays	enhancer-like element involved in anoxic specific inducibility	anaerobic induction	Stress responsiveness
Sh_So07H0284923.t1	ShAP2-13	ARE	AAACCA	1614	6	+	Zea mays	cis-acting regulatory element essential for the anaerobic induction	anaerobic induction	Stress responsiveness
Sh_So07H0284923.t1	ShAP2-13	MYB	CAACAG	1390	6	-	Arabidopsis thaliana		MYB	Transcription factor
Sh_So07H0284923.t1	ShAP2-13	MYB	CAACAG	218	6	-	Arabidopsis thaliana		MYB	Transcription factor
Sh_So07H0284923.t1	ShAP2-13	MYB	CAACAG	534	6	-	Arabidopsis thaliana		MYB	Transcription factor
Sh_So07H0284923.t1	ShAP2-13	MYB	CAACAG	978	6	-	Arabidopsis thaliana		MYB	Transcription factor
Sh_So07H0284923.t1	ShAP2-13	MBS	CAACTG	1671	6	+	Arabidopsis thaliana	MYB binding site involved in drought-inducibility	MYB	Transcription factor
Sh_So07H0284923.t1	ShAP2-13	MBS	CAACTG	185	6	+	Arabidopsis thaliana	MYB binding site involved in drought-inducibility	MYB	Transcription factor
Sh_So07H0284923.t1	ShAP2-13	MBS	CAACTG	2138	6	+	Arabidopsis thaliana	MYB binding site involved in drought-inducibility	MYB	Transcription factor
Sh_So07H0284923.t1	ShAP2-13	MBS	CAACTG	945	6	+	Arabidopsis thaliana	MYB binding site involved in drought-inducibility	MYB	Transcription factor
Sh_So07H0284923.t1	ShAP2-13	Myb	TAACTG	9	6	-	Arabidopsis thaliana		MYB	Transcription factor
Sh_So07H0284923.t1	ShAP2-13	Myb	TAACTG	100	6	-	Arabidopsis thaliana		MYB	Transcription factor
Sh_So07H0284923.t1	ShAP2-13	Myb	TAACTG	861	6	-	Arabidopsis thaliana		MYB	Transcription factor
Sh_So07H0284923.t1	ShAP2-13	Myb	TAACTG	1658	6	+	Arabidopsis thaliana		MYB	Transcription factor
Sh_So07H0284923.t1	ShAP2-13	W box	TTGACC	426	6	+	Arabidopsis thaliana		WRKY	Transcription factor
Sh_So07H0284923.t1	ShAP2-13	W box	TTGACC	1240	6	+	Arabidopsis thaliana		WRKY	Transcription factor
Sh_So07H0284923.t1	ShAP2-13	W box	TTGACC	1730	6	+	Arabidopsis thaliana		WRKY	Transcription factor
Sh_So07H0284923.t1	ShAP2-13	W box	TTGACC	2042	6	+	Arabidopsis thaliana		WRKY	Transcription factor
Sh_So07H0284923.t1	ShAP2-13	W box	TTGACC	2075	6	-	Arabidopsis thaliana		WRKY	Transcription factor
Sh_So07H0284923.t1	ShAP2-13	MYB	CAACCA	256	6	+	Arabidopsis thaliana		MYB	Transcription factor
Sh_So07H0284923.t1	ShAP2-13	MYB	CAACCA	1016	6	+	Arabidopsis thaliana		MYB	Transcription factor
Sh_So07H0284923.t1	ShAP2-13	MYB	CAACCA	1579	6	+	Arabidopsis thaliana		MYB	Transcription factor
Sh_So07H0284923.t1	ShAP2-13	MYC	CATTTG	382	6	+	Arabidopsis thaliana		MYC	Transcription factor
Sh_So07H0284923.t1	ShAP2-13	MYC	CATTTG	749	6	-	Arabidopsis thaliana		MYC	Transcription factor
Sh_So07H0284923.t1	ShAP2-13	MYC	CATTTG	1143	6	+	Arabidopsis thaliana		MYC	Transcription factor
Sh_So07H0284923.t1	ShAP2-13	MYC	CATTTG	1714	6	+	Arabidopsis thaliana		MYC	Transcription factor
Sh_So07H0284923.t1	ShAP2-13	MYC	CATTTG	2367	6	-	Arabidopsis thaliana		MYC	Transcription factor
Sh_So02F0114567.t1	ShAP2-16	G-box	CACGAC	1825	6	+	Zea mays	cis-acting regulatory element involved in light responsiveness	Light responsiveness	Light responsiveness
Sh_So02F0114567.t1	ShAP2-16	GT1-motif	GTGTGTGAA	2488	9	-	Solanum tuberosum	light responsive element	Light responsiveness	Light responsiveness
Sh_So02F0114567.t1	ShAP2-16	Box 4	ATTAAT	1769	6	-	Petroselinum crispum	part of a conserved DNA module involved in light responsiveness	Light responsiveness	Light responsiveness
Sh_So02F0114567.t1	ShAP2-16	I-box	GTATAAGGCC	462	9	+	Larix laricina	part of a light responsive element	Light responsiveness	Light responsiveness
Sh_So02F0114567.t1	ShAP2-16	TCCC-motif	TCTCCCT	2135	7	+	Spinacia oleracea	part of a light responsive element	Light responsiveness	Light responsiveness
Sh_So02F0114567.t1	ShAP2-16	TCCC-motif	TCTCCCT	2190	7	-	Spinacia oleracea	part of a light responsive element	Light responsiveness	Light responsiveness
Sh_So02F0114567.t1	ShAP2-16	chs-CMA2b	GAACCTACACAC	2058	11	-	Hordeum vulgare	part of a light responsive element	Light responsiveness	Light responsiveness
Sh_So02F0114567.t1	ShAP2-16	GA-motif	ATAGATAA	2108	8	-	Arabidopsis thaliana	part of a light responsive element	Light responsiveness	Light responsiveness
Sh_So02F0114567.t1	ShAP2-16	TCCC-motif	TCTCCCT	2145	7	+	Spinacia oleracea	part of a light responsive element	Light responsiveness	Light responsiveness
Sh_So02F0114567.t1	ShAP2-16	ABRE	CGTACGTGCA	631	9	+	Hordeum vulgare	cis-acting element involved in the abscisic acid responsiveness	abscisic acid responsiveness	Hormone responsiveness
Sh_So02F0114567.t1	ShAP2-16	P-box	CCTTTTG	1524	7	-	Oryza sativa	gibberellin-responsive element	GA responsiveness	Hormone responsiveness
Sh_So02F0114567.t1	ShAP2-16	P-box	CCTTTTG	2213	7	+	Oryza sativa	gibberellin-responsive element	GA responsiveness	Hormone responsiveness
Sh_So02F0114567.t1	ShAP2-16	TGACG-motif	TGACG	75	5	+	Hordeum vulgare	cis-acting regulatory element involved in the MeJA-responsiveness	MeJA responsiveness	Hormone responsiveness
Sh_So02F0114567.t1	ShAP2-16	TGACG-motif	TGACG	769	5	+	Hordeum vulgare	cis-acting regulatory element involved in the MeJA-responsiveness	MeJA responsiveness	Hormone responsiveness
Sh_So02F0114567.t1	ShAP2-16	AAGAA-motif	gGTAAAGAAA	86	9	-	Avena sativa		abscisic acid responsiveness	Hormone responsiveness
Sh_So02F0114567.t1	ShAP2-16	AAGAA-motif	gGTAAAGAAA	152	9	+	Avena sativa		abscisic acid responsiveness	Hormone responsiveness
Sh_So02F0114567.t1	ShAP2-16	AAGAA-motif	gGTAAAGAAA	788	9	+	Avena sativa		abscisic acid responsiveness	Hormone responsiveness
Sh_So02F0114567.t1	ShAP2-16	ERE	ATTTTAAA	1795	8	-	Nicotiana glutinos		ETH responsiveness	Hormone responsiveness
Sh_So02F0114567.t1	ShAP2-16	CGTCA-motif	CGTCA	75	5	-	Hordeum vulgare	cis-acting regulatory element involved in the MeJA-responsiveness	MeJA responsiveness	Hormone responsiveness
Sh_So02F0114567.t1	ShAP2-16	CGTCA-motif	CGTCA	769	5	-	Hordeum vulgare	cis-acting regulatory element involved in the MeJA-responsiveness	MeJA responsiveness	Hormone responsiveness
Sh_So02F0114567.t1	ShAP2-16	GARE-motif	TCTGTTG	1272	7	-	Brassica oleracea	gibberellin-responsive element	GA responsiveness	Hormone responsiveness
Sh_So02F0114567.t1	ShAP2-16	O2-site	GATGA(C/T)(A/G)TG(A/G)	2348	8	-	Zea mays	cis-acting regulatory element involved in zein metabolism regulation	zein metabolism regulation	Development responsiveness
Sh_So02F0114567.t1	ShAP2-16	RY-element	CATGCATG	911	8	+	Helianthus annuus	cis-acting regulatory element involved in seed-specific regulation	seed-specific regulation	Development responsiveness
Sh_So02F0114567.t1	ShAP2-16	RY-element	CATGCATG	939	8	+	Helianthus annuus	cis-acting regulatory element involved in seed-specific regulation	seed-specific regulation	Development responsiveness
Sh_So02F0114567.t1	ShAP2-16	CAT-box	GCCACT	80	6	+	Arabidopsis thaliana	cis-acting regulatory element related to meristem expression	Meristem specific activation	Development responsiveness
Sh_So02F0114567.t1	ShAP2-16	CAT-box	GCCACT	1388	6	-	Arabidopsis thaliana	cis-acting regulatory element related to meristem expression	Meristem specific activation	Development responsiveness
Sh_So02F0114567.t1	ShAP2-16	CAT-box	GCCACT	1760	6	+	Arabidopsis thaliana	cis-acting regulatory element related to meristem expression	Meristem specific activation	Development responsiveness
Sh_So02F0114567.t1	ShAP2-16	STRE	AGGGG	1982	5	-	Arabidopsis thaliana		Wound responsiveness	Stress responsiveness
Sh_So02F0114567.t1	ShAP2-16	STRE	AGGGG	2228	5	-	Arabidopsis thaliana		Wound responsiveness	Stress responsiveness
Sh_So02F0114567.t1	ShAP2-16	TC-rich repeats	GTTTTCTTAC	1644	9	-	Nicotiana tabacum	cis-acting element involved in defense and stress responsiveness	Defense and stress	Stress responsiveness
Sh_So02F0114567.t1	ShAP2-16	WUN-motif	AAATTTCTT	156	9	-	Nicotiana glutinosa		Wound responsiveness	Stress responsiveness
Sh_So02F0114567.t1	ShAP2-16	WRE3	CCACCT	1477	6	-	Pisum sativum		Wound responsiveness	Stress responsiveness
Sh_So02F0114567.t1	ShAP2-16	WRE3	CCACCT	2284	6	+	Pisum sativum		Wound responsiveness	Stress responsiveness
Sh_So02F0114567.t1	ShAP2-16	LTR	CCGAAA	254	6	-	Hordeum vulgare	cis-acting element involved in low-temperature responsiveness	low-temperature	Stress responsiveness
Sh_So02F0114567.t1	ShAP2-16	LTR	CCGAAA	552	6	+	Hordeum vulgare	cis-acting element involved in low-temperature responsiveness	low-temperature	Stress responsiveness
Sh_So02F0114567.t1	ShAP2-16	ARE	AAACCA	47	6	+	Zea mays	cis-acting regulatory element essential for the anaerobic induction	anaerobic induction	Stress responsiveness
Sh_So02F0114567.t1	ShAP2-16	ARE	AAACCA	529	6	+	Zea mays	cis-acting regulatory element essential for the anaerobic induction	anaerobic induction	Stress responsiveness
Sh_So02F0114567.t1	ShAP2-16	ARE	AAACCA	1583	6	-	Zea mays	cis-acting regulatory element essential for the anaerobic induction	anaerobic induction	Stress responsiveness
Sh_So02F0114567.t1	ShAP2-16	GC-motif	CCCCCG	207	6	+	Zea mays	enhancer-like element involved in anoxic specific inducibility	anaerobic induction	Stress responsiveness
Sh_So02F0114567.t1	ShAP2-16	MYB	CAACAG	1272	6	+	Arabidopsis thaliana		MYB	Transcription factor
Sh_So02F0114567.t1	ShAP2-16	MYB	CAACAG	1335	6	-	Arabidopsis thaliana		MYB	Transcription factor
Sh_So02F0114567.t1	ShAP2-16	MYC	CATGTG	457	6	-	Arabidopsis thaliana		MYC	Transcription factor
Sh_So02F0114567.t1	ShAP2-16	MYC	CATGTG	1165	6	-	Arabidopsis thaliana		MYC	Transcription factor
Sh_So02F0114567.t1	ShAP2-16	MYC	CATGTG	1167	6	+	Arabidopsis thaliana		MYC	Transcription factor
Sh_So02F0114567.t1	ShAP2-16	MYC	CATTTG	1489	6	-	Arabidopsis thaliana		MYC	Transcription factor
Sh_So02F0114567.t1	ShAP2-16	MYC	CATGTG	2091	6	+	Arabidopsis thaliana		MYC	Transcription factor
Sh_So02F0114567.t1	ShAP2-16	DRE core	GCCGAC	167	6	+	Arabidopsis thaliana		DRE	Transcription factor
Sh_So02F0114567.t1	ShAP2-16	MYB	CAACCA	2127	6	+	Arabidopsis thaliana		MYB	Transcription factor
Sh_So02F0114567.t1	ShAP2-16	MYB	CAACCA	2259	6	+	Arabidopsis thaliana		MYB	Transcription factor
Sh_So02F0114567.t1	ShAP2-16	MYB recognition site	CCGTTG	803	6	+	Arabidopsis thaliana		MYB	Transcription factor
Sh_So02F0114567.t1	ShAP2-16	MYB	CAACAG	1910	6	+	Arabidopsis thaliana		MYB	Transcription factor
Sh_So02F0114567.t1	ShAP2-16	CCAAT-box	CAACGG	803	6	-	Hordeum vulgare	MYBHv1 binding site	MYB	Transcription factor
Sh_So02F0114567.t1	ShAP2-16	Myb	TAACTG	586	6	+	Arabidopsis thaliana		MYB	Transcription factor
Sh_So02F0114567.t1	ShAP2-16	MYB	CAACAG	949	6	-	Arabidopsis thaliana		MYB	Transcription factor
Sh_So02F0114567.t1	ShAP2-16	MBS	CAACTG	1332	6	+	Arabidopsis thaliana	MYB binding site involved in drought-inducibility	MYB	Transcription factor
Sh_So02F0114567.t1	ShAP2-16	MBS	CAACTG	993	6	-	Arabidopsis thaliana	MYB binding site involved in drought-inducibility	MYB	Transcription factor
Sh_Ss01A0030413.t1	ShAP2-2	G-box	CACGTG	2022	6	-	Arabidopsis thaliana	cis-acting regulatory element involved in light responsiveness	Light responsiveness	Light responsiveness
Sh_Ss01A0030413.t1	ShAP2-2	Sp1	GGGCGG	891	6	-	Oryza sativa	light responsive element	Light responsiveness	Light responsiveness
Sh_Ss01A0030413.t1	ShAP2-2	G-Box	CACGTT	1640	6	-	Pisum sativum	cis-acting regulatory element involved in light responsiveness	Light responsiveness	Light responsiveness
Sh_Ss01A0030413.t1	ShAP2-2	G-Box	CACGTT	1987	6	-	Pisum sativum	cis-acting regulatory element involved in light responsiveness	Light responsiveness	Light responsiveness
Sh_Ss01A0030413.t1	ShAP2-2	G-box	GCCACGTGGA	2020	9	+	Arabidopsis thaliana	cis-acting regulatory element involved in light responsiveness	Light responsiveness	Light responsiveness
Sh_Ss01A0030413.t1	ShAP2-2	TCT-motif	TCTTAC	1123	6	+	Arabidopsis thaliana	part of a light responsive element	Light responsiveness	Light responsiveness
Sh_Ss01A0030413.t1	ShAP2-2	AE-box	AGAAACAA	628	8	+	Arabidopsis thaliana	part of a module for light response	Light responsiveness	Light responsiveness
Sh_Ss01A0030413.t1	ShAP2-2	GT1-motif	GGTTAA	1515	6	+	Arabidopsis thaliana	light responsive element	Light responsiveness	Light responsiveness
Sh_Ss01A0030413.t1	ShAP2-2	Box 4	ATTAAT	661	6	+	Petroselinum crispum	part of a conserved DNA module involved in light responsiveness	Light responsiveness	Light responsiveness
Sh_Ss01A0030413.t1	ShAP2-2	Box 4	ATTAAT	1834	6	-	Petroselinum crispum	part of a conserved DNA module involved in light responsiveness	Light responsiveness	Light responsiveness
Sh_Ss01A0030413.t1	ShAP2-2	Box II	CCACGTGGC	2020	9	-	Petroselinum crispum	part of a light responsive element	Light responsiveness	Light responsiveness
Sh_Ss01A0030413.t1	ShAP2-2	ABRE	CACGTG	2022	6	-	Arabidopsis thaliana	cis-acting element involved in the abscisic acid responsiveness	abscisic acid responsiveness	Hormone responsiveness
Sh_Ss01A0030413.t1	ShAP2-2	CGTCA-motif	CGTCA	1458	5	-	Hordeum vulgare	cis-acting regulatory element involved in the MeJA-responsiveness	MeJA responsiveness	Hormone responsiveness
Sh_Ss01A0030413.t1	ShAP2-2	CGTCA-motif	CGTCA	1993	5	+	Hordeum vulgare	cis-acting regulatory element involved in the MeJA-responsiveness	MeJA responsiveness	Hormone responsiveness
Sh_Ss01A0030413.t1	ShAP2-2	AAGAA-motif	GAAAGAA	548	7	-	Avena sativa		abscisic acid responsiveness	Hormone responsiveness
Sh_Ss01A0030413.t1	ShAP2-2	AAGAA-motif	GAAAGAA	1571	7	-	Avena sativa		abscisic acid responsiveness	Hormone responsiveness
Sh_Ss01A0030413.t1	ShAP2-2	TGA-element	AACGAC	1344	6	-	Brassica oleracea	auxin-responsive element	Auxin responsiveness	Hormone responsiveness
Sh_Ss01A0030413.t1	ShAP2-2	P-box	CCTTTTG	2143	7	+	Oryza sativa	gibberellin-responsive element	GA responsiveness	Hormone responsiveness
Sh_Ss01A0030413.t1	ShAP2-2	ABRE	ACGTG	1641	5	+	Arabidopsis thaliana	cis-acting element involved in the abscisic acid responsiveness	abscisic acid responsiveness	Hormone responsiveness
Sh_Ss01A0030413.t1	ShAP2-2	ABRE	ACGTG	1988	5	+	Arabidopsis thaliana	cis-acting element involved in the abscisic acid responsiveness	abscisic acid responsiveness	Hormone responsiveness
Sh_Ss01A0030413.t1	ShAP2-2	ABRE	ACGTG	2023	5	+	Arabidopsis thaliana	cis-acting element involved in the abscisic acid responsiveness	abscisic acid responsiveness	Hormone responsiveness
Sh_Ss01A0030413.t1	ShAP2-2	GARE-motif	TCTGTTG	834	7	+	Brassica oleracea	gibberellin-responsive element	GA responsiveness	Hormone responsiveness
Sh_Ss01A0030413.t1	ShAP2-2	GARE-motif	TCTGTTG	936	7	-	Brassica oleracea	gibberellin-responsive element	GA responsiveness	Hormone responsiveness
Sh_Ss01A0030413.t1	ShAP2-2	ERE	ATTTCATA	150	8	-	Nicotiana glutinos		ETH responsiveness	Hormone responsiveness
Sh_Ss01A0030413.t1	ShAP2-2	ERE	ATTTTAAA	223	8	+	Nicotiana glutinos		ETH responsiveness	Hormone responsiveness
Sh_Ss01A0030413.t1	ShAP2-2	TCA	TCATCTTCAT	1766	9	-	Pisum sativum		SA responsiveness	Hormone responsiveness
Sh_Ss01A0030413.t1	ShAP2-2	ABRE2	CCACGTGG	2021	8	-	Zea mays		abscisic acid responsiveness	Hormone responsiveness
Sh_Ss01A0030413.t1	ShAP2-2	TGACG-motif	TGACG	1458	5	+	Hordeum vulgare	cis-acting regulatory element involved in the MeJA-responsiveness	MeJA responsiveness	Hormone responsiveness
Sh_Ss01A0030413.t1	ShAP2-2	TGACG-motif	TGACG	1993	5	-	Hordeum vulgare	cis-acting regulatory element involved in the MeJA-responsiveness	MeJA responsiveness	Hormone responsiveness
Sh_Ss01A0030413.t1	ShAP2-2	CAT-box	GCCACT	2365	6	-	Arabidopsis thaliana	cis-acting regulatory element related to meristem expression	Meristem specific activation	Development responsiveness
Sh_Ss01A0030413.t1	ShAP2-2	CCGTCC-box	CCGTCC	1091	6	+	Petroselinum hortense		Meristem specific activation	Development responsiveness
Sh_Ss01A0030413.t1	ShAP2-2	LTR	CCGAAA	390	6	+	Hordeum vulgare	cis-acting element involved in low-temperature responsiveness	low-temperature	Stress responsiveness
Sh_Ss01A0030413.t1	ShAP2-2	LTR	CCGAAA	1598	6	-	Hordeum vulgare	cis-acting element involved in low-temperature responsiveness	low-temperature	Stress responsiveness
Sh_Ss01A0030413.t1	ShAP2-2	LTR	CCGAAA	1636	6	+	Hordeum vulgare	cis-acting element involved in low-temperature responsiveness	low-temperature	Stress responsiveness
Sh_Ss01A0030413.t1	ShAP2-2	STRE	AGGGG	882	5	-	Arabidopsis thaliana		Wound responsiveness	Stress responsiveness
Sh_Ss01A0030413.t1	ShAP2-2	STRE	AGGGG	894	5	-	Arabidopsis thaliana		Wound responsiveness	Stress responsiveness
Sh_Ss01A0030413.t1	ShAP2-2	STRE	AGGGG	944	5	-	Arabidopsis thaliana		Wound responsiveness	Stress responsiveness
Sh_Ss01A0030413.t1	ShAP2-2	STRE	AGGGG	998	5	+	Arabidopsis thaliana		Wound responsiveness	Stress responsiveness
Sh_Ss01A0030413.t1	ShAP2-2	STRE	AGGGG	1222	5	-	Arabidopsis thaliana		Wound responsiveness	Stress responsiveness
Sh_Ss01A0030413.t1	ShAP2-2	STRE	AGGGG	2007	5	-	Arabidopsis thaliana		Wound responsiveness	Stress responsiveness
Sh_Ss01A0030413.t1	ShAP2-2	STRE	AGGGG	2089	5	-	Arabidopsis thaliana		Wound responsiveness	Stress responsiveness
Sh_Ss01A0030413.t1	ShAP2-2	STRE	AGGGG	2214	5	-	Arabidopsis thaliana		Wound responsiveness	Stress responsiveness
Sh_Ss01A0030413.t1	ShAP2-2	STRE	AGGGG	2277	5	-	Arabidopsis thaliana		Wound responsiveness	Stress responsiveness
Sh_Ss01A0030413.t1	ShAP2-2	STRE	AGGGG	2338	5	-	Arabidopsis thaliana		Wound responsiveness	Stress responsiveness
Sh_Ss01A0030413.t1	ShAP2-2	WRE3	CCACCT	1036	6	+	Pisum sativum		Wound responsiveness	Stress responsiveness
Sh_Ss01A0030413.t1	ShAP2-2	WRE3	CCACCT	2428	6	+	Pisum sativum		Wound responsiveness	Stress responsiveness
Sh_Ss01A0030413.t1	ShAP2-2	ARE	AAACCA	1309	6	+	Zea mays	cis-acting regulatory element essential for the anaerobic induction	anaerobic induction	Stress responsiveness
Sh_Ss01A0030413.t1	ShAP2-2	ARE	AAACCA	1495	6	+	Zea mays	cis-acting regulatory element essential for the anaerobic induction	anaerobic induction	Stress responsiveness
Sh_Ss01A0030413.t1	ShAP2-2	MYB	CAACAG	1621	6	-	Arabidopsis thaliana		MYB	Transcription factor
Sh_Ss01A0030413.t1	ShAP2-2	MYB	CAACAG	194	6	-	Arabidopsis thaliana		MYB	Transcription factor
Sh_Ss01A0030413.t1	ShAP2-2	MYB	CAACAG	835	6	-	Arabidopsis thaliana		MYB	Transcription factor
Sh_Ss01A0030413.t1	ShAP2-2	MYB	CAACAG	936	6	+	Arabidopsis thaliana		MYB	Transcription factor
Sh_Ss01A0030413.t1	ShAP2-2	W box	TTGACC	1018	6	-	Arabidopsis thaliana		WRKY	Transcription factor
Sh_Ss01A0030413.t1	ShAP2-2	W box	TTGACC	2112	6	-	Arabidopsis thaliana		WRKY	Transcription factor
Sh_Ss01A0030413.t1	ShAP2-2	MYC	CATTTG	739	6	-	Arabidopsis thaliana		MYC	Transcription factor
Sh_Ss01A0030413.t1	ShAP2-2	MYC	CATTTG	1747	6	-	Arabidopsis thaliana		MYC	Transcription factor
Sh_Ss01A0030413.t1	ShAP2-2	MYC	CATGTG	2131	6	-	Arabidopsis thaliana		MYC	Transcription factor
Sh_Ss01A0030413.t1	ShAP2-2	MYC	CATGTG	2230	6	-	Arabidopsis thaliana		MYC	Transcription factor
Sh_Ss01A0030413.t1	ShAP2-2	DRE core	GCCGAC	1742	6	-	Arabidopsis thaliana		DRE	Transcription factor
Sh_Ss01A0030413.t1	ShAP2-2	MBSI	aaaAaaC(G/C)GTTA	1519	10.5	+	Petunia hybrida	MYB binding site involved in flavonoid biosynthetic genes regulation	MYB	Transcription factor
Sh_Ss01A0030413.t1	ShAP2-2	MYB	CAACCA	1154	6	+	Arabidopsis thaliana		MYB	Transcription factor
Sh_Ss01A0030413.t1	ShAP2-2	MYB	CAACCA	2425	6	+	Arabidopsis thaliana		MYB	Transcription factor
Sh_Ss01A0030413.t1	ShAP2-2	MYB	TAACCA	961	6	-	Arabidopsis thaliana		MYB	Transcription factor
Sh_So02F0117597.t1	ShAP2-20	chs-CMA2b	GAACCTACACAC	299	11	+	Hordeum vulgare	part of a light responsive element	Light responsiveness	Light responsiveness
Sh_So02F0117597.t1	ShAP2-20	G-Box	CACGTT	1318	6	+	Pisum sativum	cis-acting regulatory element involved in light responsiveness	Light responsiveness	Light responsiveness
Sh_So02F0117597.t1	ShAP2-20	Sp1	GGGCGG	2373	6	-	Oryza sativa	light responsive element	Light responsiveness	Light responsiveness
Sh_So02F0117597.t1	ShAP2-20	G-box	CACGTC	180	6	+	Zea mays	cis-acting regulatory element involved in light responsiveness	Light responsiveness	Light responsiveness
Sh_So02F0117597.t1	ShAP2-20	G-box	CACGAC	550	6	+	Zea mays	cis-acting regulatory element involved in light responsiveness	Light responsiveness	Light responsiveness
Sh_So02F0117597.t1	ShAP2-20	G-box	ACACGTGT	1647	8	-	Brassica napus	cis-acting regulatory element involved in light responsiveness	Light responsiveness	Light responsiveness
Sh_So02F0117597.t1	ShAP2-20	G-box	CACGTC	2299	6	+	Zea mays	cis-acting regulatory element involved in light responsiveness	Light responsiveness	Light responsiveness
Sh_So02F0117597.t1	ShAP2-20	I-box	gGATAAGGTG	227	9	-	Zea mays	part of a light responsive element	Light responsiveness	Light responsiveness
Sh_So02F0117597.t1	ShAP2-20	I-box	cGATAAGGCG	416	9	+	Zea mays	part of a light responsive element	Light responsiveness	Light responsiveness
Sh_So02F0117597.t1	ShAP2-20	I-box	gGATAAGGTG	1503	9	+	Zea mays	part of a light responsive element	Light responsiveness	Light responsiveness
Sh_So02F0117597.t1	ShAP2-20	TCT-motif	TCTTAC	590	6	+	Arabidopsis thaliana	part of a light responsive element	Light responsiveness	Light responsiveness
Sh_So02F0117597.t1	ShAP2-20	ACE	CTAACGTATT	2125	9	-	Petroselinum crispum	cis-acting element involved in light responsiveness	Light responsiveness	Light responsiveness
Sh_So02F0117597.t1	ShAP2-20	GT1-motif	GGTTAA	1309	6	+	Arabidopsis thaliana	light responsive element	Light responsiveness	Light responsiveness
Sh_So02F0117597.t1	ShAP2-20	Box 4	ATTAAT	810	6	+	Petroselinum crispum	part of a conserved DNA module involved in light responsiveness	Light responsiveness	Light responsiveness
Sh_So02F0117597.t1	ShAP2-20	Box 4	ATTAAT	1475	6	-	Petroselinum crispum	part of a conserved DNA module involved in light responsiveness	Light responsiveness	Light responsiveness
Sh_So02F0117597.t1	ShAP2-20	Box 4	ATTAAT	2069	6	-	Petroselinum crispum	part of a conserved DNA module involved in light responsiveness	Light responsiveness	Light responsiveness
Sh_So02F0117597.t1	ShAP2-20	Box 4	ATTAAT	2104	6	-	Petroselinum crispum	part of a conserved DNA module involved in light responsiveness	Light responsiveness	Light responsiveness
Sh_So02F0117597.t1	ShAP2-20	G-box	CACGTG	1648	6	-	Arabidopsis thaliana	cis-acting regulatory element involved in light responsiveness	Light responsiveness	Light responsiveness
Sh_So02F0117597.t1	ShAP2-20	G-box	TACGTG	188	6	-	Arabidopsis thaliana	cis-acting regulatory element involved in light responsiveness	Light responsiveness	Light responsiveness
Sh_So02F0117597.t1	ShAP2-20	G-box	TACGTG	273	6	+	Arabidopsis thaliana	cis-acting regulatory element involved in light responsiveness	Light responsiveness	Light responsiveness
Sh_So02F0117597.t1	ShAP2-20	AAGAA-motif	GAAAGAA	2227	7	-	Avena sativa		abscisic acid responsiveness	Hormone responsiveness
Sh_So02F0117597.t1	ShAP2-20	CGTCA-motif	CGTCA	78	5	+	Hordeum vulgare	cis-acting regulatory element involved in the MeJA-responsiveness	MeJA responsiveness	Hormone responsiveness
Sh_So02F0117597.t1	ShAP2-20	CGTCA-motif	CGTCA	479	5	+	Hordeum vulgare	cis-acting regulatory element involved in the MeJA-responsiveness	MeJA responsiveness	Hormone responsiveness
Sh_So02F0117597.t1	ShAP2-20	CGTCA-motif	CGTCA	1572	5	-	Hordeum vulgare	cis-acting regulatory element involved in the MeJA-responsiveness	MeJA responsiveness	Hormone responsiveness
Sh_So02F0117597.t1	ShAP2-20	ABRE	ACGTG	180	5	-	Arabidopsis thaliana	cis-acting element involved in the abscisic acid responsiveness	abscisic acid responsiveness	Hormone responsiveness
Sh_So02F0117597.t1	ShAP2-20	ABRE	ACGTG	188	5	-	Arabidopsis thaliana	cis-acting element involved in the abscisic acid responsiveness	abscisic acid responsiveness	Hormone responsiveness
Sh_So02F0117597.t1	ShAP2-20	ABRE	ACGTG	274	5	+	Arabidopsis thaliana	cis-acting element involved in the abscisic acid responsiveness	abscisic acid responsiveness	Hormone responsiveness
Sh_So02F0117597.t1	ShAP2-20	ABRE	ACGTG	1318	5	-	Arabidopsis thaliana	cis-acting element involved in the abscisic acid responsiveness	abscisic acid responsiveness	Hormone responsiveness
Sh_So02F0117597.t1	ShAP2-20	ABRE	ACGTG	1649	5	+	Arabidopsis thaliana	cis-acting element involved in the abscisic acid responsiveness	abscisic acid responsiveness	Hormone responsiveness
Sh_So02F0117597.t1	ShAP2-20	ABRE	ACGTG	2299	5	-	Arabidopsis thaliana	cis-acting element involved in the abscisic acid responsiveness	abscisic acid responsiveness	Hormone responsiveness
Sh_So02F0117597.t1	ShAP2-20	P-box	CCTTTTG	1111	7	+	Oryza sativa	gibberellin-responsive element	GA responsiveness	Hormone responsiveness
Sh_So02F0117597.t1	ShAP2-20	P-box	CCTTTTG	1263	7	+	Oryza sativa	gibberellin-responsive element	GA responsiveness	Hormone responsiveness
Sh_So02F0117597.t1	ShAP2-20	ABRE4	CACGTA	188	6	+	Zea mays		abscisic acid responsiveness	Hormone responsiveness
Sh_So02F0117597.t1	ShAP2-20	ABRE4	CACGTA	273	6	-	Zea mays		abscisic acid responsiveness	Hormone responsiveness
Sh_So02F0117597.t1	ShAP2-20	ERE	ATTTTAAA	358	8	+	Nicotiana glutinos		ETH responsiveness	Hormone responsiveness
Sh_So02F0117597.t1	ShAP2-20	ERE	ATTTCATA	964	8	-	Nicotiana glutinos		ETH responsiveness	Hormone responsiveness
Sh_So02F0117597.t1	ShAP2-20	TCA	TCATCTTCAT	390	9	-	Pisum sativum		SA responsiveness	Hormone responsiveness
Sh_So02F0117597.t1	ShAP2-20	F-box	CTATTCTCATT	431	10	-	Lycopersicon esculentum		GA responsiveness	Hormone responsiveness
Sh_So02F0117597.t1	ShAP2-20	TATC-box	TATCCCA	232	7	+	Oryza sativa	cis-acting element involved in gibberellin-responsiveness	GA responsiveness	Hormone responsiveness
Sh_So02F0117597.t1	ShAP2-20	TGACG-motif	TGACG	78	5	-	Hordeum vulgare	cis-acting regulatory element involved in the MeJA-responsiveness	MeJA responsiveness	Hormone responsiveness
Sh_So02F0117597.t1	ShAP2-20	TGACG-motif	TGACG	479	5	-	Hordeum vulgare	cis-acting regulatory element involved in the MeJA-responsiveness	MeJA responsiveness	Hormone responsiveness
Sh_So02F0117597.t1	ShAP2-20	TGACG-motif	TGACG	1572	5	+	Hordeum vulgare	cis-acting regulatory element involved in the MeJA-responsiveness	MeJA responsiveness	Hormone responsiveness
Sh_So02F0117597.t1	ShAP2-20	ABRE	CACGTG	1648	6	-	Arabidopsis thaliana	cis-acting element involved in the abscisic acid responsiveness	abscisic acid responsiveness	Hormone responsiveness
Sh_So02F0117597.t1	ShAP2-20	ABRE3a	TACGTG	188	6	-	Zea mays		abscisic acid responsiveness	Hormone responsiveness
Sh_So02F0117597.t1	ShAP2-20	ABRE3a	TACGTG	273	6	+	Zea mays		abscisic acid responsiveness	Hormone responsiveness
Sh_So02F0117597.t1	ShAP2-20	O2-site	GATGA(C/T)(A/G)TG(A/G)	1292	8	+	Zea mays	cis-acting regulatory element involved in zein metabolism regulation	zein metabolism regulation	Development responsiveness
Sh_So02F0117597.t1	ShAP2-20	LTR	CCGAAA	1037	6	+	Hordeum vulgare	cis-acting element involved in low-temperature responsiveness	low-temperature	Stress responsiveness
Sh_So02F0117597.t1	ShAP2-20	TC-rich repeats	ATTCTCTAAC	1580	9	-	Nicotiana tabacum	cis-acting element involved in defense and stress responsiveness	Defense and stress	Stress responsiveness
Sh_So02F0117597.t1	ShAP2-20	STRE	AGGGG	404	5	+	Arabidopsis thaliana		Wound responsiveness	Stress responsiveness
Sh_So02F0117597.t1	ShAP2-20	STRE	AGGGG	1495	5	-	Arabidopsis thaliana		Wound responsiveness	Stress responsiveness
Sh_So02F0117597.t1	ShAP2-20	STRE	AGGGG	1817	5	-	Arabidopsis thaliana		Wound responsiveness	Stress responsiveness
Sh_So02F0117597.t1	ShAP2-20	WRE3	CCACCT	1054	6	-	Pisum sativum		Wound responsiveness	Stress responsiveness
Sh_So02F0117597.t1	ShAP2-20	WRE3	CCACCT	1508	6	-	Pisum sativum		Wound responsiveness	Stress responsiveness
Sh_So02F0117597.t1	ShAP2-20	ARE	AAACCA	562	6	+	Zea mays	cis-acting regulatory element essential for the anaerobic induction	anaerobic induction	Stress responsiveness
Sh_So02F0117597.t1	ShAP2-20	ARE	AAACCA	1041	6	+	Zea mays	cis-acting regulatory element essential for the anaerobic induction	anaerobic induction	Stress responsiveness
Sh_So02F0117597.t1	ShAP2-20	ARE	AAACCA	1802	6	+	Zea mays	cis-acting regulatory element essential for the anaerobic induction	anaerobic induction	Stress responsiveness
Sh_So02F0117597.t1	ShAP2-20	GC-motif	CCCCCG	2236	6	+	Zea mays	enhancer-like element involved in anoxic specific inducibility	anaerobic induction	Stress responsiveness
Sh_So02F0117597.t1	ShAP2-20	GC-motif	CCCCCG	2376	6	+	Zea mays	enhancer-like element involved in anoxic specific inducibility	anaerobic induction	Stress responsiveness
Sh_So02F0117597.t1	ShAP2-20	W box	TTGACC	1726	6	+	Arabidopsis thaliana		WRKY	Transcription factor
Sh_So02F0117597.t1	ShAP2-20	CCAAT-box	CAACGG	1134	6	-	Hordeum vulgare	MYBHv1 binding site	MYB	Transcription factor
Sh_So02F0117597.t1	ShAP2-20	MYC	CATGTG	24	6	-	Arabidopsis thaliana		MYC	Transcription factor
Sh_So02F0117597.t1	ShAP2-20	MYC	CATGTG	84	6	-	Arabidopsis thaliana		MYC	Transcription factor
Sh_So02F0117597.t1	ShAP2-20	MYC	CATTTG	1340	6	+	Arabidopsis thaliana		MYC	Transcription factor
Sh_So02F0117597.t1	ShAP2-20	MYC	CATGTG	1981	6	-	Arabidopsis thaliana		MYC	Transcription factor
Sh_So02F0117597.t1	ShAP2-20	MYC	CATGTG	2136	6	+	Arabidopsis thaliana		MYC	Transcription factor
Sh_So02F0117597.t1	ShAP2-20	MYB	CAACCA	105	6	-	Arabidopsis thaliana		MYB	Transcription factor
Sh_So02F0117597.t1	ShAP2-20	MYB	CAACCA	168	6	+	Arabidopsis thaliana		MYB	Transcription factor
Sh_So02F0117597.t1	ShAP2-20	MYB	CAACCA	254	6	+	Arabidopsis thaliana		MYB	Transcription factor
Sh_So02F0117597.t1	ShAP2-20	MYB recognition site	CCGTTG	1134	6	+	Arabidopsis thaliana		MYB	Transcription factor
Sh_So02F0117597.t1	ShAP2-20	MYB	TAACCA	1154	6	-	Arabidopsis thaliana		MYB	Transcription factor
Sh_So02F0117597.t1	ShAP2-20	MYB	TAACCA	726	6	-	Arabidopsis thaliana		MYB	Transcription factor
Sh_So02F0117597.t1	ShAP2-20	MYB	TAACCA	743	6	+	Arabidopsis thaliana		MYB	Transcription factor
Sh_Ss03I0174784.t1	ShAP2-25	ATCT-motif	AATCTAATCC	1998	9	-	Pisum sativum	part of a conserved DNA module involved in light responsiveness	Light responsiveness	Light responsiveness
Sh_Ss03I0174784.t1	ShAP2-25	Box 4	ATTAAT	2044	6	-	Petroselinum crispum	part of a conserved DNA module involved in light responsiveness	Light responsiveness	Light responsiveness
Sh_Ss03I0174784.t1	ShAP2-25	G-box	CACGTC	1363	6	-	Zea mays	cis-acting regulatory element involved in light responsiveness	Light responsiveness	Light responsiveness
Sh_Ss03I0174784.t1	ShAP2-25	G-box	CACGTG	1855	6	-	Arabidopsis thaliana	cis-acting regulatory element involved in light responsiveness	Light responsiveness	Light responsiveness
Sh_Ss03I0174784.t1	ShAP2-25	G-box	CACGTG	855	6	+	Arabidopsis thaliana	cis-acting regulatory element involved in light responsiveness	Light responsiveness	Light responsiveness
Sh_Ss03I0174784.t1	ShAP2-25	GT1-motif	GGTTAA	1492	6	-	Arabidopsis thaliana	light responsive element	Light responsiveness	Light responsiveness
Sh_Ss03I0174784.t1	ShAP2-25	GT1-motif	GGTTAAT	1491	7	-	Avena sativa	light responsive element	Light responsiveness	Light responsiveness
Sh_Ss03I0174784.t1	ShAP2-25	Sp1	GGGCGG	728	6	-	Oryza sativa	light responsive element	Light responsiveness	Light responsiveness
Sh_Ss03I0174784.t1	ShAP2-25	G-box	TACGTG	1393	6	-	Arabidopsis thaliana	cis-acting regulatory element involved in light responsiveness	Light responsiveness	Light responsiveness
Sh_Ss03I0174784.t1	ShAP2-25	G-box	TACGTG	1798	6	-	Arabidopsis thaliana	cis-acting regulatory element involved in light responsiveness	Light responsiveness	Light responsiveness
Sh_Ss03I0174784.t1	ShAP2-25	G-box	TACGTG	1833	6	-	Arabidopsis thaliana	cis-acting regulatory element involved in light responsiveness	Light responsiveness	Light responsiveness
Sh_Ss03I0174784.t1	ShAP2-25	Box 4	ATTAAT	512	6	+	Petroselinum crispum	part of a conserved DNA module involved in light responsiveness	Light responsiveness	Light responsiveness
Sh_Ss03I0174784.t1	ShAP2-25	Box 4	ATTAAT	607	6	+	Petroselinum crispum	part of a conserved DNA module involved in light responsiveness	Light responsiveness	Light responsiveness
Sh_Ss03I0174784.t1	ShAP2-25	Box 4	ATTAAT	1201	6	+	Petroselinum crispum	part of a conserved DNA module involved in light responsiveness	Light responsiveness	Light responsiveness
Sh_Ss03I0174784.t1	ShAP2-25	Box 4	ATTAAT	1263	6	-	Petroselinum crispum	part of a conserved DNA module involved in light responsiveness	Light responsiveness	Light responsiveness
Sh_Ss03I0174784.t1	ShAP2-25	Box 4	ATTAAT	1543	6	-	Petroselinum crispum	part of a conserved DNA module involved in light responsiveness	Light responsiveness	Light responsiveness
Sh_Ss03I0174784.t1	ShAP2-25	Box 4	ATTAAT	2127	6	-	Petroselinum crispum	part of a conserved DNA module involved in light responsiveness	Light responsiveness	Light responsiveness
Sh_Ss03I0174784.t1	ShAP2-25	G-box	TACGTG	244	6	-	Arabidopsis thaliana	cis-acting regulatory element involved in light responsiveness	Light responsiveness	Light responsiveness
Sh_Ss03I0174784.t1	ShAP2-25	G-box	CACGAC	733	6	+	Zea mays	cis-acting regulatory element involved in light responsiveness	Light responsiveness	Light responsiveness
Sh_Ss03I0174784.t1	ShAP2-25	G-box	CACGAC	828	6	+	Zea mays	cis-acting regulatory element involved in light responsiveness	Light responsiveness	Light responsiveness
Sh_Ss03I0174784.t1	ShAP2-25	G-box	CACGTC	2102	6	-	Zea mays	cis-acting regulatory element involved in light responsiveness	Light responsiveness	Light responsiveness
Sh_Ss03I0174784.t1	ShAP2-25	ABRE	ACGTG	1364	5	+	Arabidopsis thaliana	cis-acting element involved in the abscisic acid responsiveness	abscisic acid responsiveness	Hormone responsiveness
Sh_Ss03I0174784.t1	ShAP2-25	ABRE	ACGTG	1393	5	-	Arabidopsis thaliana	cis-acting element involved in the abscisic acid responsiveness	abscisic acid responsiveness	Hormone responsiveness
Sh_Ss03I0174784.t1	ShAP2-25	ABRE	ACGTG	1798	5	-	Arabidopsis thaliana	cis-acting element involved in the abscisic acid responsiveness	abscisic acid responsiveness	Hormone responsiveness
Sh_Ss03I0174784.t1	ShAP2-25	ABRE	ACGTG	1833	5	-	Arabidopsis thaliana	cis-acting element involved in the abscisic acid responsiveness	abscisic acid responsiveness	Hormone responsiveness
Sh_Ss03I0174784.t1	ShAP2-25	ABRE	ACGTG	1856	5	+	Arabidopsis thaliana	cis-acting element involved in the abscisic acid responsiveness	abscisic acid responsiveness	Hormone responsiveness
Sh_Ss03I0174784.t1	ShAP2-25	ABRE4	CACGTA	1393	6	+	Zea mays		abscisic acid responsiveness	Hormone responsiveness
Sh_Ss03I0174784.t1	ShAP2-25	ABRE4	CACGTA	1798	6	+	Zea mays		abscisic acid responsiveness	Hormone responsiveness
Sh_Ss03I0174784.t1	ShAP2-25	ABRE4	CACGTA	1833	6	+	Zea mays		abscisic acid responsiveness	Hormone responsiveness
Sh_Ss03I0174784.t1	ShAP2-25	ABRE	CACGTG	1855	6	-	Arabidopsis thaliana	cis-acting element involved in the abscisic acid responsiveness	abscisic acid responsiveness	Hormone responsiveness
Sh_Ss03I0174784.t1	ShAP2-25	ABRE	CACGTG	855	6	+	Arabidopsis thaliana	cis-acting element involved in the abscisic acid responsiveness	abscisic acid responsiveness	Hormone responsiveness
Sh_Ss03I0174784.t1	ShAP2-25	ABRE	CGCACGTGTC	1853	9	+	Hordeum vulgare	cis-acting element involved in the abscisic acid responsiveness	abscisic acid responsiveness	Hormone responsiveness
Sh_Ss03I0174784.t1	ShAP2-25	CGTCA-motif	CGTCA	340	5	-	Hordeum vulgare	cis-acting regulatory element involved in the MeJA-responsiveness	MeJA responsiveness	Hormone responsiveness
Sh_Ss03I0174784.t1	ShAP2-25	CGTCA-motif	CGTCA	784	5	-	Hordeum vulgare	cis-acting regulatory element involved in the MeJA-responsiveness	MeJA responsiveness	Hormone responsiveness
Sh_Ss03I0174784.t1	ShAP2-25	CGTCA-motif	CGTCA	2101	5	-	Hordeum vulgare	cis-acting regulatory element involved in the MeJA-responsiveness	MeJA responsiveness	Hormone responsiveness
Sh_Ss03I0174784.t1	ShAP2-25	F-box	CTATTCTCATT	982	10	-	Lycopersicon esculentum		GA responsiveness	Hormone responsiveness
Sh_Ss03I0174784.t1	ShAP2-25	ABRE3a	TACGTG	1393	6	-	Zea mays		abscisic acid responsiveness	Hormone responsiveness
Sh_Ss03I0174784.t1	ShAP2-25	ABRE4	CACGTA	244	6	+	Zea mays		abscisic acid responsiveness	Hormone responsiveness
Sh_Ss03I0174784.t1	ShAP2-25	TGA-element	AACGAC	557	6	-	Brassica oleracea	auxin-responsive element	Auxin responsiveness	Hormone responsiveness
Sh_Ss03I0174784.t1	ShAP2-25	ABRE3a	TACGTG	1798	6	-	Zea mays		abscisic acid responsiveness	Hormone responsiveness
Sh_Ss03I0174784.t1	ShAP2-25	TGACG-motif	TGACG	340	5	+	Hordeum vulgare	cis-acting regulatory element involved in the MeJA-responsiveness	MeJA responsiveness	Hormone responsiveness
Sh_Ss03I0174784.t1	ShAP2-25	TGACG-motif	TGACG	784	5	+	Hordeum vulgare	cis-acting regulatory element involved in the MeJA-responsiveness	MeJA responsiveness	Hormone responsiveness
Sh_Ss03I0174784.t1	ShAP2-25	TGACG-motif	TGACG	2101	5	+	Hordeum vulgare	cis-acting regulatory element involved in the MeJA-responsiveness	MeJA responsiveness	Hormone responsiveness
Sh_Ss03I0174784.t1	ShAP2-25	ABRE	CGTACGTGCA	242	9	-	Hordeum vulgare	cis-acting element involved in the abscisic acid responsiveness	abscisic acid responsiveness	Hormone responsiveness
Sh_Ss03I0174784.t1	ShAP2-25	ABRE	ACGTG	244	5	-	Arabidopsis thaliana	cis-acting element involved in the abscisic acid responsiveness	abscisic acid responsiveness	Hormone responsiveness
Sh_Ss03I0174784.t1	ShAP2-25	ABRE	GACACGTACGT	831	10	+	Oryza sativa	cis-acting element involved in the abscisic acid responsiveness	abscisic acid responsiveness	Hormone responsiveness
Sh_Ss03I0174784.t1	ShAP2-25	ABRE	CGCACGTGTC	853	9	+	Hordeum vulgare	cis-acting element involved in the abscisic acid responsiveness	abscisic acid responsiveness	Hormone responsiveness
Sh_Ss03I0174784.t1	ShAP2-25	ABRE	ACGTG	856	5	+	Arabidopsis thaliana	cis-acting element involved in the abscisic acid responsiveness	abscisic acid responsiveness	Hormone responsiveness
Sh_Ss03I0174784.t1	ShAP2-25	ABRE3a	TACGTG	1833	6	-	Zea mays		abscisic acid responsiveness	Hormone responsiveness
Sh_Ss03I0174784.t1	ShAP2-25	ABRE	ACGTG	2103	5	+	Arabidopsis thaliana	cis-acting element involved in the abscisic acid responsiveness	abscisic acid responsiveness	Hormone responsiveness
Sh_Ss03I0174784.t1	ShAP2-25	ABRE3a	TACGTG	244	6	-	Zea mays		abscisic acid responsiveness	Hormone responsiveness
Sh_Ss03I0174784.t1	ShAP2-25	CCGTCC-box	CCGTCC	2457	6	+	Petroselinum hortense		Meristem specific activation	Development responsiveness
Sh_Ss03I0174784.t1	ShAP2-25	O2-site	GTTGACGTGA	1392	9	-	Zea mays	cis-acting regulatory element involved in zein metabolism regulation	zein metabolism regulation	Development responsiveness
Sh_Ss03I0174784.t1	ShAP2-25	RY-element	CATGCATG	1067	8	+	Helianthus annuus	cis-acting regulatory element involved in seed-specific regulation	seed-specific regulation	Development responsiveness
Sh_Ss03I0174784.t1	ShAP2-25	CCGTCC-box	CCGTCC	178	6	+	Petroselinum hortense		Meristem specific activation	Development responsiveness
Sh_Ss03I0174784.t1	ShAP2-25	CCGTCC-box	CCGTCC	2400	6	+	Petroselinum hortense		Meristem specific activation	Development responsiveness
Sh_Ss03I0174784.t1	ShAP2-25	O2-site	GTTGACGTGA	2070	9	+	Zea mays	cis-acting regulatory element involved in zein metabolism regulation	zein metabolism regulation	Development responsiveness
Sh_Ss03I0174784.t1	ShAP2-25	STRE	AGGGG	1408	5	+	Arabidopsis thaliana		Wound responsiveness	Stress responsiveness
Sh_Ss03I0174784.t1	ShAP2-25	STRE	AGGGG	1890	5	-	Arabidopsis thaliana		Wound responsiveness	Stress responsiveness
Sh_Ss03I0174784.t1	ShAP2-25	LTR	CCGAAA	1271	6	+	Hordeum vulgare	cis-acting element involved in low-temperature responsiveness	low-temperature	Stress responsiveness
Sh_Ss03I0174784.t1	ShAP2-25	STRE	AGGGG	138	5	-	Arabidopsis thaliana		Wound responsiveness	Stress responsiveness
Sh_Ss03I0174784.t1	ShAP2-25	STRE	AGGGG	261	5	-	Arabidopsis thaliana		Wound responsiveness	Stress responsiveness
Sh_Ss03I0174784.t1	ShAP2-25	ARE	AAACCA	1981	6	-	Zea mays	cis-acting regulatory element essential for the anaerobic induction	anaerobic induction	Stress responsiveness
Sh_Ss03I0174784.t1	ShAP2-25	ARE	AAACCA	1011	6	-	Zea mays	cis-acting regulatory element essential for the anaerobic induction	anaerobic induction	Stress responsiveness
Sh_Ss03I0174784.t1	ShAP2-25	MYB	CAACAG	404	6	-	Arabidopsis thaliana		MYB	Transcription factor
Sh_Ss03I0174784.t1	ShAP2-25	MYC	CAATTG	1913	6	-	Arabidopsis thaliana		MYC	Transcription factor
Sh_Ss03I0174784.t1	ShAP2-25	MYB	TAACCA	1178	6	+	Arabidopsis thaliana		MYB	Transcription factor
Sh_Ss03I0174784.t1	ShAP2-25	MYB	TAACCA	1493	6	+	Arabidopsis thaliana		MYB	Transcription factor
Sh_Ss03I0174784.t1	ShAP2-25	MYB	TAACCA	474	6	+	Arabidopsis thaliana		MYB	Transcription factor
Sh_Ss03I0174784.t1	ShAP2-25	MRE	AACCTAA	1215	7	-	Petroselinum crispum	MYB binding site involved in light responsiveness	MYB	Transcription factor
Sh_Ss03I0174784.t1	ShAP2-25	DRE core	GCCGAC	367	6	+	Arabidopsis thaliana		DRE	Transcription factor
Sh_Ss03I0174784.t1	ShAP2-25	DRE core	GCCGAC	2268	6	-	Arabidopsis thaliana		DRE	Transcription factor
Sh_Ss03I0174784.t1	ShAP2-25	MYC	CATGTG	1065	6	-	Arabidopsis thaliana		MYC	Transcription factor
Sh_Ss03I0174784.t1	ShAP2-25	Myc	TCTCTTA	1548	7	-	Arabidopsis thaliana		MYC	Transcription factor
Sh_So03I0177104.t1	ShAP2-26	GT1-motif	GGTTAA	825	6	-	Arabidopsis thaliana	light responsive element	Light responsiveness	Light responsiveness
Sh_So03I0177104.t1	ShAP2-26	GT1-motif	GGTTAA	1501	6	-	Arabidopsis thaliana	light responsive element	Light responsiveness	Light responsiveness
Sh_So03I0177104.t1	ShAP2-26	Box 4	ATTAAT	1827	6	-	Petroselinum crispum	part of a conserved DNA module involved in light responsiveness	Light responsiveness	Light responsiveness
Sh_So03I0177104.t1	ShAP2-26	Box 4	ATTAAT	2471	6	-	Petroselinum crispum	part of a conserved DNA module involved in light responsiveness	Light responsiveness	Light responsiveness
Sh_So03I0177104.t1	ShAP2-26	G-box	CACGTC	1076	6	+	Zea mays	cis-acting regulatory element involved in light responsiveness	Light responsiveness	Light responsiveness
Sh_So03I0177104.t1	ShAP2-26	G-box	CACGAC	1208	6	-	Zea mays	cis-acting regulatory element involved in light responsiveness	Light responsiveness	Light responsiveness
Sh_So03I0177104.t1	ShAP2-26	GATA-motif	GATAGGA	1274	7	-	Arabidopsis thaliana	part of a light responsive element	Light responsiveness	Light responsiveness
Sh_So03I0177104.t1	ShAP2-26	GATA-motif	GATAGGG	2423	7	-	Pisum sativum	part of a light responsive element	Light responsiveness	Light responsiveness
Sh_So03I0177104.t1	ShAP2-26	AE-box	AGAAACTT	753	8	+	Arabidopsis thaliana	part of a module for light response	Light responsiveness	Light responsiveness
Sh_So03I0177104.t1	ShAP2-26	AE-box	AGAAACTT	2187	8	+	Arabidopsis thaliana	part of a module for light response	Light responsiveness	Light responsiveness
Sh_So03I0177104.t1	ShAP2-26	TCT-motif	TCTTAC	1464	6	+	Arabidopsis thaliana	part of a light responsive element	Light responsiveness	Light responsiveness
Sh_So03I0177104.t1	ShAP2-26	TCT-motif	TCTTAC	2177	6	+	Arabidopsis thaliana	part of a light responsive element	Light responsiveness	Light responsiveness
Sh_So03I0177104.t1	ShAP2-26	TGACG-motif	TGACG	395	5	+	Hordeum vulgare	cis-acting regulatory element involved in the MeJA-responsiveness	MeJA responsiveness	Hormone responsiveness
Sh_So03I0177104.t1	ShAP2-26	TGACG-motif	TGACG	1978	5	-	Hordeum vulgare	cis-acting regulatory element involved in the MeJA-responsiveness	MeJA responsiveness	Hormone responsiveness
Sh_So03I0177104.t1	ShAP2-26	TCA-element	CCATCTTTTT	239	9	-	Nicotiana tabacum	cis-acting element involved in salicylic acid responsiveness	SA responsiveness	Hormone responsiveness
Sh_So03I0177104.t1	ShAP2-26	ABRE	ACGTG	1076	5	-	Arabidopsis thaliana	cis-acting element involved in the abscisic acid responsiveness	abscisic acid responsiveness	Hormone responsiveness
Sh_So03I0177104.t1	ShAP2-26	CGTCA-motif	CGTCA	395	5	-	Hordeum vulgare	cis-acting regulatory element involved in the MeJA-responsiveness	MeJA responsiveness	Hormone responsiveness
Sh_So03I0177104.t1	ShAP2-26	CGTCA-motif	CGTCA	1978	5	+	Hordeum vulgare	cis-acting regulatory element involved in the MeJA-responsiveness	MeJA responsiveness	Hormone responsiveness
Sh_So03I0177104.t1	ShAP2-26	ERE	ATTTTAAA	199	8	+	Nicotiana glutinos		ETH responsiveness	Hormone responsiveness
Sh_So03I0177104.t1	ShAP2-26	ERE	ATTTTAAA	201	8	-	Nicotiana glutinos		ETH responsiveness	Hormone responsiveness
Sh_So03I0177104.t1	ShAP2-26	AAGAA-motif	gGTAAAGAAA	274	9	-	Avena sativa		abscisic acid responsiveness	Hormone responsiveness
Sh_So03I0177104.t1	ShAP2-26	AAGAA-motif	gGTAAAGAAA	305	9	+	Avena sativa		abscisic acid responsiveness	Hormone responsiveness
Sh_So03I0177104.t1	ShAP2-26	AAGAA-motif	gGTAAAGAAA	315	9	-	Avena sativa		abscisic acid responsiveness	Hormone responsiveness
Sh_So03I0177104.t1	ShAP2-26	AAGAA-motif	gGTAAAGAAA	559	9	+	Avena sativa		abscisic acid responsiveness	Hormone responsiveness
Sh_So03I0177104.t1	ShAP2-26	AAGAA-motif	GAAAGAA	1263	7	+	Avena sativa		abscisic acid responsiveness	Hormone responsiveness
Sh_So03I0177104.t1	ShAP2-26	GCN4_motif	TGAGTCA	1868	7	+	Oryza sativa	cis-regulatory element involved in endosperm expression	endosperm	Development responsiveness
Sh_So03I0177104.t1	ShAP2-26	CAT-box	GCCACT	2272	6	+	Arabidopsis thaliana	cis-acting regulatory element related to meristem expression	Meristem specific activation	Development responsiveness
Sh_So03I0177104.t1	ShAP2-26	RY-element	CATGCATG	1094	8	+	Helianthus annuus	cis-acting regulatory element involved in seed-specific regulation	seed-specific regulation	Development responsiveness
Sh_So03I0177104.t1	ShAP2-26	RY-element	CATGCATG	1187	8	+	Helianthus annuus	cis-acting regulatory element involved in seed-specific regulation	seed-specific regulation	Development responsiveness
Sh_So03I0177104.t1	ShAP2-26	RY-element	CATGCATG	1489	8	-	Helianthus annuus	cis-acting regulatory element involved in seed-specific regulation	seed-specific regulation	Development responsiveness
Sh_So03I0177104.t1	ShAP2-26	RY-element	CATGCATG	2000	8	-	Helianthus annuus	cis-acting regulatory element involved in seed-specific regulation	seed-specific regulation	Development responsiveness
Sh_So03I0177104.t1	ShAP2-26	circadian	CAAAGATATC	348	9	+	Lycopersicon esculentum	cis-acting regulatory element involved in circadian control	circadian control	Development responsiveness
Sh_So03I0177104.t1	ShAP2-26	circadian	CAAAGATATC	352	9	-	Lycopersicon esculentum	cis-acting regulatory element involved in circadian control	circadian control	Development responsiveness
Sh_So03I0177104.t1	ShAP2-26	circadian	CAAAGATATC	565	9	-	Lycopersicon esculentum	cis-acting regulatory element involved in circadian control	circadian control	Development responsiveness
Sh_So03I0177104.t1	ShAP2-26	CCGTCC-box	CCGTCC	1086	6	+	Petroselinum hortense		Meristem specific activation	Development responsiveness
Sh_So03I0177104.t1	ShAP2-26	WRE3	CCACCT	1070	6	-	Pisum sativum		Wound responsiveness	Stress responsiveness
Sh_So03I0177104.t1	ShAP2-26	WUN-motif	AAATTTCTT	271	9	+	Nicotiana glutinosa		Wound responsiveness	Stress responsiveness
Sh_So03I0177104.t1	ShAP2-26	WUN-motif	AAATTTCTT	309	9	-	Nicotiana glutinosa		Wound responsiveness	Stress responsiveness
Sh_So03I0177104.t1	ShAP2-26	WUN-motif	AAATTTCTT	312	9	+	Nicotiana glutinosa		Wound responsiveness	Stress responsiveness
Sh_So03I0177104.t1	ShAP2-26	WUN-motif	AAATTACT	708	8	-	Nicotiana glutinosa		Wound responsiveness	Stress responsiveness
Sh_So03I0177104.t1	ShAP2-26	STRE	AGGGG	2195	5	-	Arabidopsis thaliana		Wound responsiveness	Stress responsiveness
Sh_So03I0177104.t1	ShAP2-26	STRE	AGGGG	2361	5	-	Arabidopsis thaliana		Wound responsiveness	Stress responsiveness
Sh_So03I0177104.t1	ShAP2-26	STRE	AGGGG	2422	5	-	Arabidopsis thaliana		Wound responsiveness	Stress responsiveness
Sh_So03I0177104.t1	ShAP2-26	STRE	AGGGG	2463	5	+	Arabidopsis thaliana		Wound responsiveness	Stress responsiveness
Sh_So03I0177104.t1	ShAP2-26	TC-rich repeats	GTTTTCTTAC	1460	9	+	Nicotiana tabacum	cis-acting element involved in defense and stress responsiveness	Defense and stress	Stress responsiveness
Sh_So03I0177104.t1	ShAP2-26	TC-rich repeats	GTTTTCTTAC	1566	9	-	Nicotiana tabacum	cis-acting element involved in defense and stress responsiveness	Defense and stress	Stress responsiveness
Sh_So03I0177104.t1	ShAP2-26	TC-rich repeats	GTTTTCTTAC	2173	9	+	Nicotiana tabacum	cis-acting element involved in defense and stress responsiveness	Defense and stress	Stress responsiveness
Sh_So03I0177104.t1	ShAP2-26	LTR	CCGAAA	130	6	-	Hordeum vulgare	cis-acting element involved in low-temperature responsiveness	low-temperature	Stress responsiveness
Sh_So03I0177104.t1	ShAP2-26	ARE	AAACCA	811	6	+	Zea mays	cis-acting regulatory element essential for the anaerobic induction	anaerobic induction	Stress responsiveness
Sh_So03I0177104.t1	ShAP2-26	MYB	CAACAG	2325	6	-	Arabidopsis thaliana		MYB	Transcription factor
Sh_So03I0177104.t1	ShAP2-26	MBS	CAACTG	1722	6	+	Arabidopsis thaliana	MYB binding site involved in drought-inducibility	MYB	Transcription factor
Sh_So03I0177104.t1	ShAP2-26	MYB	CAACCA	2455	6	+	Arabidopsis thaliana		MYB	Transcription factor
Sh_So03I0177104.t1	ShAP2-26	MYC	CAATTG	1443	6	-	Arabidopsis thaliana		MYC	Transcription factor
Sh_So03I0177104.t1	ShAP2-26	MYC	CATGTG	1775	6	+	Arabidopsis thaliana		MYC	Transcription factor
Sh_So03I0177104.t1	ShAP2-26	MYC	CATTTG	1937	6	-	Arabidopsis thaliana		MYC	Transcription factor
Sh_So03I0177104.t1	ShAP2-26	DRE core	GCCGAC	692	6	-	Arabidopsis thaliana		DRE	Transcription factor
Sh_So03I0177104.t1	ShAP2-26	DRE1	ACCGAGA	555	7	-	Zea mays		DRE	Transcription factor
Sh_So03I0177104.t1	ShAP2-26	DRE1	ACCGAGA	664	7	-	Zea mays		DRE	Transcription factor
Sh_So03I0177104.t1	ShAP2-26	Myb	TAACTG	371	6	+	Arabidopsis thaliana		MYB	Transcription factor
Sh_So03I0177104.t1	ShAP2-26	Myb	TAACTG	2124	6	-	Arabidopsis thaliana		MYB	Transcription factor
Sh_So04B0192329.t1	ShAP2-27	TCCC-motif	TCTCCCT	417	7	+	Spinacia oleracea	part of a light responsive element	Light responsiveness	Light responsiveness
Sh_So04B0192329.t1	ShAP2-27	Sp1	GGGCGG	645	6	-	Oryza sativa	light responsive element	Light responsiveness	Light responsiveness
Sh_So04B0192329.t1	ShAP2-27	chs-Unit 1 m1	ACCTAACCCGC	1373	10	+	Hordeum vulgare	part of a light responsive element	Light responsiveness	Light responsiveness
Sh_So04B0192329.t1	ShAP2-27	GT1-motif	GGTTAAT	95	7	-	Avena sativa	light responsive element	Light responsiveness	Light responsiveness
Sh_So04B0192329.t1	ShAP2-27	GT1-motif	GGTTAA	96	6	-	Arabidopsis thaliana	light responsive element	Light responsiveness	Light responsiveness
Sh_So04B0192329.t1	ShAP2-27	GT1-motif	GGTTAA	1067	6	+	Arabidopsis thaliana	light responsive element	Light responsiveness	Light responsiveness
Sh_So04B0192329.t1	ShAP2-27	GT1-motif	GGTTAA	1844	6	+	Arabidopsis thaliana	light responsive element	Light responsiveness	Light responsiveness
Sh_So04B0192329.t1	ShAP2-27	Box 4	ATTAAT	2131	6	-	Petroselinum crispum	part of a conserved DNA module involved in light responsiveness	Light responsiveness	Light responsiveness
Sh_So04B0192329.t1	ShAP2-27	G-box	CACGAC	515	6	+	Zea mays	cis-acting regulatory element involved in light responsiveness	Light responsiveness	Light responsiveness
Sh_So04B0192329.t1	ShAP2-27	G-box	CACGAC	1028	6	+	Zea mays	cis-acting regulatory element involved in light responsiveness	Light responsiveness	Light responsiveness
Sh_So04B0192329.t1	ShAP2-27	G-box	CACGAC	1794	6	-	Zea mays	cis-acting regulatory element involved in light responsiveness	Light responsiveness	Light responsiveness
Sh_So04B0192329.t1	ShAP2-27	AAGAA-motif	gGTAAAGAAA	23	9	+	Avena sativa		abscisic acid responsiveness	Hormone responsiveness
Sh_So04B0192329.t1	ShAP2-27	TATC-box	TATCCCA	1938	7	+	Oryza sativa	cis-acting element involved in gibberellin-responsiveness	GA responsiveness	Hormone responsiveness
Sh_So04B0192329.t1	ShAP2-27	CGTCA-motif	CGTCA	1168	5	+	Hordeum vulgare	cis-acting regulatory element involved in the MeJA-responsiveness	MeJA responsiveness	Hormone responsiveness
Sh_So04B0192329.t1	ShAP2-27	CGTCA-motif	CGTCA	2237	5	+	Hordeum vulgare	cis-acting regulatory element involved in the MeJA-responsiveness	MeJA responsiveness	Hormone responsiveness
Sh_So04B0192329.t1	ShAP2-27	ERE	ATTTTAAA	39	8	-	Nicotiana glutinos		ETH responsiveness	Hormone responsiveness
Sh_So04B0192329.t1	ShAP2-27	ERE	ATTTTAAA	308	8	+	Nicotiana glutinos		ETH responsiveness	Hormone responsiveness
Sh_So04B0192329.t1	ShAP2-27	ABRE	GCAACGTGTC	185	9	+	Hordeum vulgare	cis-acting element involved in the abscisic acid responsiveness	abscisic acid responsiveness	Hormone responsiveness
Sh_So04B0192329.t1	ShAP2-27	ABRE	GCAACGTGTC	1261	9	+	Hordeum vulgare	cis-acting element involved in the abscisic acid responsiveness	abscisic acid responsiveness	Hormone responsiveness
Sh_So04B0192329.t1	ShAP2-27	TGACG-motif	TGACG	1168	5	-	Hordeum vulgare	cis-acting regulatory element involved in the MeJA-responsiveness	MeJA responsiveness	Hormone responsiveness
Sh_So04B0192329.t1	ShAP2-27	TGACG-motif	TGACG	2237	5	-	Hordeum vulgare	cis-acting regulatory element involved in the MeJA-responsiveness	MeJA responsiveness	Hormone responsiveness
Sh_So04B0192329.t1	ShAP2-27	CCGTCC-box	CCGTCC	202	6	-	Petroselinum hortense		Meristem specific activation	Development responsiveness
Sh_So04B0192329.t1	ShAP2-27	CCGTCC-box	CCGTCC	1160	6	+	Petroselinum hortense		Meristem specific activation	Development responsiveness
Sh_So04B0192329.t1	ShAP2-27	GCN4_motif	TGAGTCA	1499	7	+	Oryza sativa	cis-regulatory element involved in endosperm expression	endosperm	Development responsiveness
Sh_So04B0192329.t1	ShAP2-27	LTR	CCGAAA	134	6	+	Hordeum vulgare	cis-acting element involved in low-temperature responsiveness	low-temperature	Stress responsiveness
Sh_So04B0192329.t1	ShAP2-27	LTR	CCGAAA	219	6	-	Hordeum vulgare	cis-acting element involved in low-temperature responsiveness	low-temperature	Stress responsiveness
Sh_So04B0192329.t1	ShAP2-27	LTR	CCGAAA	267	6	-	Hordeum vulgare	cis-acting element involved in low-temperature responsiveness	low-temperature	Stress responsiveness
Sh_So04B0192329.t1	ShAP2-27	LTR	CCGAAA	871	6	-	Hordeum vulgare	cis-acting element involved in low-temperature responsiveness	low-temperature	Stress responsiveness
Sh_So04B0192329.t1	ShAP2-27	LTR	CCGAAA	1307	6	+	Hordeum vulgare	cis-acting element involved in low-temperature responsiveness	low-temperature	Stress responsiveness
Sh_So04B0192329.t1	ShAP2-27	LTR	CCGAAA	1338	6	+	Hordeum vulgare	cis-acting element involved in low-temperature responsiveness	low-temperature	Stress responsiveness
Sh_So04B0192329.t1	ShAP2-27	LTR	CCGAAA	1390	6	+	Hordeum vulgare	cis-acting element involved in low-temperature responsiveness	low-temperature	Stress responsiveness
Sh_So04B0192329.t1	ShAP2-27	LTR	CCGAAA	1428	6	+	Hordeum vulgare	cis-acting element involved in low-temperature responsiveness	low-temperature	Stress responsiveness
Sh_So04B0192329.t1	ShAP2-27	LTR	CCGAAA	1584	6	-	Hordeum vulgare	cis-acting element involved in low-temperature responsiveness	low-temperature	Stress responsiveness
Sh_So04B0192329.t1	ShAP2-27	LTR	CCGAAA	1625	6	+	Hordeum vulgare	cis-acting element involved in low-temperature responsiveness	low-temperature	Stress responsiveness
Sh_So04B0192329.t1	ShAP2-27	LTR	CCGAAA	1637	6	+	Hordeum vulgare	cis-acting element involved in low-temperature responsiveness	low-temperature	Stress responsiveness
Sh_So04B0192329.t1	ShAP2-27	LTR	CCGAAA	1643	6	+	Hordeum vulgare	cis-acting element involved in low-temperature responsiveness	low-temperature	Stress responsiveness
Sh_So04B0192329.t1	ShAP2-27	LTR	CCGAAA	1649	6	+	Hordeum vulgare	cis-acting element involved in low-temperature responsiveness	low-temperature	Stress responsiveness
Sh_So04B0192329.t1	ShAP2-27	LTR	CCGAAA	1682	6	+	Hordeum vulgare	cis-acting element involved in low-temperature responsiveness	low-temperature	Stress responsiveness
Sh_So04B0192329.t1	ShAP2-27	LTR	CCGAAA	1697	6	+	Hordeum vulgare	cis-acting element involved in low-temperature responsiveness	low-temperature	Stress responsiveness
Sh_So04B0192329.t1	ShAP2-27	WRE3	CCACCT	652	6	+	Pisum sativum		Wound responsiveness	Stress responsiveness
Sh_So04B0192329.t1	ShAP2-27	WUN-motif	AAATTTCCT	2177	9	+	Brassica oleracea	wound-responsive element	Wound responsiveness	Stress responsiveness
Sh_So04B0192329.t1	ShAP2-27	STRE	AGGGG	426	5	-	Arabidopsis thaliana		Wound responsiveness	Stress responsiveness
Sh_So04B0192329.t1	ShAP2-27	STRE	AGGGG	1033	5	-	Arabidopsis thaliana		Wound responsiveness	Stress responsiveness
Sh_So04B0192329.t1	ShAP2-27	STRE	AGGGG	1140	5	-	Arabidopsis thaliana		Wound responsiveness	Stress responsiveness
Sh_So04B0192329.t1	ShAP2-27	STRE	AGGGG	1788	5	+	Arabidopsis thaliana		Wound responsiveness	Stress responsiveness
Sh_So04B0192329.t1	ShAP2-27	STRE	AGGGG	1815	5	-	Arabidopsis thaliana		Wound responsiveness	Stress responsiveness
Sh_So04B0192329.t1	ShAP2-27	STRE	AGGGG	1875	5	-	Arabidopsis thaliana		Wound responsiveness	Stress responsiveness
Sh_So04B0192329.t1	ShAP2-27	STRE	AGGGG	1989	5	+	Arabidopsis thaliana		Wound responsiveness	Stress responsiveness
Sh_So04B0192329.t1	ShAP2-27	STRE	AGGGG	2075	5	-	Arabidopsis thaliana		Wound responsiveness	Stress responsiveness
Sh_So04B0192329.t1	ShAP2-27	STRE	AGGGG	2126	5	-	Arabidopsis thaliana		Wound responsiveness	Stress responsiveness
Sh_So04B0192329.t1	ShAP2-27	STRE	AGGGG	2421	5	-	Arabidopsis thaliana		Wound responsiveness	Stress responsiveness
Sh_So04B0192329.t1	ShAP2-27	LTR	CCGAAA	1314	6	+	Hordeum vulgare	cis-acting element involved in low-temperature responsiveness	low-temperature	Stress responsiveness
Sh_So04B0192329.t1	ShAP2-27	GC-motif	CCCCCG	505	6	+	Zea mays	enhancer-like element involved in anoxic specific inducibility	anaerobic induction	Stress responsiveness
Sh_So04B0192329.t1	ShAP2-27	ARE	AAACCA	237	6	-	Zea mays	cis-acting regulatory element essential for the anaerobic induction	anaerobic induction	Stress responsiveness
Sh_So04B0192329.t1	ShAP2-27	ARE	AAACCA	891	6	-	Zea mays	cis-acting regulatory element essential for the anaerobic induction	anaerobic induction	Stress responsiveness
Sh_So04B0192329.t1	ShAP2-27	ARE	AAACCA	1371	6	+	Zea mays	cis-acting regulatory element essential for the anaerobic induction	anaerobic induction	Stress responsiveness
Sh_So04B0192329.t1	ShAP2-27	ARE	AAACCA	1529	6	+	Zea mays	cis-acting regulatory element essential for the anaerobic induction	anaerobic induction	Stress responsiveness
Sh_So04B0192329.t1	ShAP2-27	ARE	AAACCA	1616	6	+	Zea mays	cis-acting regulatory element essential for the anaerobic induction	anaerobic induction	Stress responsiveness
Sh_So04B0192329.t1	ShAP2-27	ARE	AAACCA	1628	6	+	Zea mays	cis-acting regulatory element essential for the anaerobic induction	anaerobic induction	Stress responsiveness
Sh_So04B0192329.t1	ShAP2-27	ARE	AAACCA	1667	6	+	Zea mays	cis-acting regulatory element essential for the anaerobic induction	anaerobic induction	Stress responsiveness
Sh_So04B0192329.t1	ShAP2-27	ARE	AAACCA	2298	6	-	Zea mays	cis-acting regulatory element essential for the anaerobic induction	anaerobic induction	Stress responsiveness
Sh_So04B0192329.t1	ShAP2-27	ARE	AAACCA	2317	6	-	Zea mays	cis-acting regulatory element essential for the anaerobic induction	anaerobic induction	Stress responsiveness
Sh_So04B0192329.t1	ShAP2-27	ARE	AAACCA	2355	6	-	Zea mays	cis-acting regulatory element essential for the anaerobic induction	anaerobic induction	Stress responsiveness
Sh_So04B0192329.t1	ShAP2-27	ARE	AAACCA	2392	6	-	Zea mays	cis-acting regulatory element essential for the anaerobic induction	anaerobic induction	Stress responsiveness
Sh_So04B0192329.t1	ShAP2-27	MBS	CAACTG	1924	6	-	Arabidopsis thaliana	MYB binding site involved in drought-inducibility	MYB	Transcription factor
Sh_So04B0192329.t1	ShAP2-27	CCAAT-box	CAACGG	997	6	-	Hordeum vulgare	MYBHv1 binding site	MYB	Transcription factor
Sh_So04B0192329.t1	ShAP2-27	CCAAT-box	CAACGG	1189	6	+	Hordeum vulgare	MYBHv1 binding site	MYB	Transcription factor
Sh_So04B0192329.t1	ShAP2-27	CCAAT-box	CAACGG	1262	6	+	Hordeum vulgare	MYBHv1 binding site	MYB	Transcription factor
Sh_So04B0192329.t1	ShAP2-27	MRE	AACCTAA	866	7	-	Petroselinum crispum	MYB binding site involved in light responsiveness	MYB	Transcription factor
Sh_So04B0192329.t1	ShAP2-27	Myb	TAACTG	1533	6	-	Arabidopsis thaliana		MYB	Transcription factor
Sh_So04B0192329.t1	ShAP2-27	MYB	CAACCA	243	6	-	Arabidopsis thaliana		MYB	Transcription factor
Sh_So04B0192329.t1	ShAP2-27	MYB	CAACCA	597	6	+	Arabidopsis thaliana		MYB	Transcription factor
Sh_So04B0192329.t1	ShAP2-27	MYC	CATTTG	822	6	+	Arabidopsis thaliana		MYC	Transcription factor
Sh_So04B0192329.t1	ShAP2-27	MYC	CATGTG	1458	6	-	Arabidopsis thaliana		MYC	Transcription factor
Sh_So04B0192329.t1	ShAP2-27	MYC	CATTTG	1573	6	-	Arabidopsis thaliana		MYC	Transcription factor
Sh_So04B0192329.t1	ShAP2-27	MYB recognition site	CCGTTG	997	6	+	Arabidopsis thaliana		MYB	Transcription factor
Sh_So04B0192329.t1	ShAP2-27	MYB recognition site	CCGTTG	1189	6	-	Arabidopsis thaliana		MYB	Transcription factor
Sh_So04B0192329.t1	ShAP2-27	MYB recognition site	CCGTTG	1262	6	-	Arabidopsis thaliana		MYB	Transcription factor
Sh_So04B0192329.t1	ShAP2-27	MYB	TAACCA	97	6	+	Arabidopsis thaliana		MYB	Transcription factor
Sh_So04B0191568.t1	ShAP2-28	GATA-motif	GATAGGG	2393	7	-	Pisum sativum	part of a light responsive element	Light responsiveness	Light responsiveness
Sh_So04B0191568.t1	ShAP2-28	Sp1	GGGCGG	1280	6	+	Oryza sativa	light responsive element	Light responsiveness	Light responsiveness
Sh_So04B0191568.t1	ShAP2-28	GA-motif	ATAGATAA	711	8	-	Arabidopsis thaliana	part of a light responsive element	Light responsiveness	Light responsiveness
Sh_So04B0191568.t1	ShAP2-28	Box 4	ATTAAT	1663	6	-	Petroselinum crispum	part of a conserved DNA module involved in light responsiveness	Light responsiveness	Light responsiveness
Sh_So04B0191568.t1	ShAP2-28	Box 4	ATTAAT	1667	6	-	Petroselinum crispum	part of a conserved DNA module involved in light responsiveness	Light responsiveness	Light responsiveness
Sh_So04B0191568.t1	ShAP2-28	Box 4	ATTAAT	2113	6	-	Petroselinum crispum	part of a conserved DNA module involved in light responsiveness	Light responsiveness	Light responsiveness
Sh_So04B0191568.t1	ShAP2-28	GT1-motif	GGTTAA	1778	6	+	Arabidopsis thaliana	light responsive element	Light responsiveness	Light responsiveness
Sh_So04B0191568.t1	ShAP2-28	GT1-motif	GGTTAA	1780	6	-	Arabidopsis thaliana	light responsive element	Light responsiveness	Light responsiveness
Sh_So04B0191568.t1	ShAP2-28	G-box	CACGAC	1204	6	+	Zea mays	cis-acting regulatory element involved in light responsiveness	Light responsiveness	Light responsiveness
Sh_So04B0191568.t1	ShAP2-28	G-box	TACGTG	1799	6	-	Arabidopsis thaliana	cis-acting regulatory element involved in light responsiveness	Light responsiveness	Light responsiveness
Sh_So04B0191568.t1	ShAP2-28	TCT-motif	TCTTAC	2177	6	+	Arabidopsis thaliana	part of a light responsive element	Light responsiveness	Light responsiveness
Sh_So04B0191568.t1	ShAP2-28	AAGAA-motif	gGTAAAGAAA	549	9	+	Avena sativa		abscisic acid responsiveness	Hormone responsiveness
Sh_So04B0191568.t1	ShAP2-28	CGTCA-motif	CGTCA	255	5	+	Hordeum vulgare	cis-acting regulatory element involved in the MeJA-responsiveness	MeJA responsiveness	Hormone responsiveness
Sh_So04B0191568.t1	ShAP2-28	CGTCA-motif	CGTCA	865	5	-	Hordeum vulgare	cis-acting regulatory element involved in the MeJA-responsiveness	MeJA responsiveness	Hormone responsiveness
Sh_So04B0191568.t1	ShAP2-28	CGTCA-motif	CGTCA	2425	5	+	Hordeum vulgare	cis-acting regulatory element involved in the MeJA-responsiveness	MeJA responsiveness	Hormone responsiveness
Sh_So04B0191568.t1	ShAP2-28	AuxRR-core	GGTCCAT	1656	7	-	Nicotiana tabacum	cis-acting regulatory element involved in auxin responsiveness	Auxin responsiveness	Hormone responsiveness
Sh_So04B0191568.t1	ShAP2-28	TCA	TCATCTTCAT	1922	9	-	Pisum sativum		SA responsiveness	Hormone responsiveness
Sh_So04B0191568.t1	ShAP2-28	ABRE	GCCGCGTGGC	1767	9	-	Oryza sativa	cis-acting element involved in the abscisic acid responsiveness	abscisic acid responsiveness	Hormone responsiveness
Sh_So04B0191568.t1	ShAP2-28	ABRE	ACGTG	1799	5	-	Arabidopsis thaliana	cis-acting element involved in the abscisic acid responsiveness	abscisic acid responsiveness	Hormone responsiveness
Sh_So04B0191568.t1	ShAP2-28	ABRE	TACGGTC	1949	7	+	Arabidopsis thaliana	cis-acting element involved in the abscisic acid responsiveness	abscisic acid responsiveness	Hormone responsiveness
Sh_So04B0191568.t1	ShAP2-28	TGA-element	AACGAC	1378	6	-	Brassica oleracea	auxin-responsive element	Auxin responsiveness	Hormone responsiveness
Sh_So04B0191568.t1	ShAP2-28	ABRE4	CACGTA	1799	6	+	Zea mays		abscisic acid responsiveness	Hormone responsiveness
Sh_So04B0191568.t1	ShAP2-28	TGACG-motif	TGACG	255	5	-	Hordeum vulgare	cis-acting regulatory element involved in the MeJA-responsiveness	MeJA responsiveness	Hormone responsiveness
Sh_So04B0191568.t1	ShAP2-28	TGACG-motif	TGACG	865	5	+	Hordeum vulgare	cis-acting regulatory element involved in the MeJA-responsiveness	MeJA responsiveness	Hormone responsiveness
Sh_So04B0191568.t1	ShAP2-28	TGACG-motif	TGACG	2425	5	-	Hordeum vulgare	cis-acting regulatory element involved in the MeJA-responsiveness	MeJA responsiveness	Hormone responsiveness
Sh_So04B0191568.t1	ShAP2-28	ABRE3a	TACGTG	1799	6	-	Zea mays		abscisic acid responsiveness	Hormone responsiveness
Sh_So04B0191568.t1	ShAP2-28	CCGTCC-box	CCGTCC	1135	6	-	Petroselinum hortense		Meristem specific activation	Development responsiveness
Sh_So04B0191568.t1	ShAP2-28	CCGTCC-box	CCGTCC	1173	6	-	Petroselinum hortense		Meristem specific activation	Development responsiveness
Sh_So04B0191568.t1	ShAP2-28	CCGTCC-box	CCGTCC	1384	6	-	Petroselinum hortense		Meristem specific activation	Development responsiveness
Sh_So04B0191568.t1	ShAP2-28	CCGTCC-box	CCGTCC	1396	6	+	Petroselinum hortense		Meristem specific activation	Development responsiveness
Sh_So04B0191568.t1	ShAP2-28	CAT-box	GCCACT	1129	6	-	Arabidopsis thaliana	cis-acting regulatory element related to meristem expression	Meristem specific activation	Development responsiveness
Sh_So04B0191568.t1	ShAP2-28	RY-element	CATGCATG	527	8	+	Helianthus annuus	cis-acting regulatory element involved in seed-specific regulation	seed-specific regulation	Development responsiveness
Sh_So04B0191568.t1	ShAP2-28	RY-element	CATGCATG	1427	8	-	Helianthus annuus	cis-acting regulatory element involved in seed-specific regulation	seed-specific regulation	Development responsiveness
Sh_So04B0191568.t1	ShAP2-28	GCN4_motif	TGAGTCA	1601	7	+	Oryza sativa	cis-regulatory element involved in endosperm expression	endosperm	Development responsiveness
Sh_So04B0191568.t1	ShAP2-28	O2-site	GATGATGTGG	1876	9	+	Zea mays	cis-acting regulatory element involved in zein metabolism regulation	zein metabolism regulation	Development responsiveness
Sh_So04B0191568.t1	ShAP2-28	LTR	CCGAAA	431	6	-	Hordeum vulgare	cis-acting element involved in low-temperature responsiveness	low-temperature	Stress responsiveness
Sh_So04B0191568.t1	ShAP2-28	LTR	CCGAAA	970	6	+	Hordeum vulgare	cis-acting element involved in low-temperature responsiveness	low-temperature	Stress responsiveness
Sh_So04B0191568.t1	ShAP2-28	WRE3	CCACCT	2294	6	-	Pisum sativum		Wound responsiveness	Stress responsiveness
Sh_So04B0191568.t1	ShAP2-28	STRE	AGGGG	1342	5	-	Arabidopsis thaliana		Wound responsiveness	Stress responsiveness
Sh_So04B0191568.t1	ShAP2-28	STRE	AGGGG	1569	5	-	Arabidopsis thaliana		Wound responsiveness	Stress responsiveness
Sh_So04B0191568.t1	ShAP2-28	STRE	AGGGG	2320	5	-	Arabidopsis thaliana		Wound responsiveness	Stress responsiveness
Sh_So04B0191568.t1	ShAP2-28	STRE	AGGGG	2392	5	-	Arabidopsis thaliana		Wound responsiveness	Stress responsiveness
Sh_So04B0191568.t1	ShAP2-28	GC-motif	CCCCCG	1057	6	+	Zea mays	enhancer-like element involved in anoxic specific inducibility	anaerobic induction	Stress responsiveness
Sh_So04B0191568.t1	ShAP2-28	ARE	AAACCA	196	6	+	Zea mays	cis-acting regulatory element essential for the anaerobic induction	anaerobic induction	Stress responsiveness
Sh_So04B0191568.t1	ShAP2-28	ARE	AAACCA	953	6	+	Zea mays	cis-acting regulatory element essential for the anaerobic induction	anaerobic induction	Stress responsiveness
Sh_So04B0191568.t1	ShAP2-28	ARE	AAACCA	2002	6	+	Zea mays	cis-acting regulatory element essential for the anaerobic induction	anaerobic induction	Stress responsiveness
Sh_So04B0191568.t1	ShAP2-28	W box	TTGACC	1288	6	+	Arabidopsis thaliana		WRKY	Transcription factor
Sh_So04B0191568.t1	ShAP2-28	W box	TTGACC	2345	6	+	Arabidopsis thaliana		WRKY	Transcription factor
Sh_So04B0191568.t1	ShAP2-28	Myb	TAACTG	766	6	+	Arabidopsis thaliana		MYB	Transcription factor
Sh_So04B0191568.t1	ShAP2-28	MYC	CATTTG	9	6	+	Arabidopsis thaliana		MYC	Transcription factor
Sh_So04B0191568.t1	ShAP2-28	MYC	CATGTG	2052	6	+	Arabidopsis thaliana		MYC	Transcription factor
Sh_So04B0191568.t1	ShAP2-28	MYC	CATGTG	2094	6	+	Arabidopsis thaliana		MYC	Transcription factor
Sh_So04B0191568.t1	ShAP2-28	MYC	CATTTG	2165	6	+	Arabidopsis thaliana		MYC	Transcription factor
Sh_So04B0191568.t1	ShAP2-28	MYC	CATGTG	2354	6	+	Arabidopsis thaliana		MYC	Transcription factor
Sh_So04B0191568.t1	ShAP2-28	DRE core	GCCGAC	1440	6	-	Arabidopsis thaliana		DRE	Transcription factor
Sh_So04B0191568.t1	ShAP2-28	MYB	CAACCA	925	6	-	Arabidopsis thaliana		MYB	Transcription factor
Sh_So04B0191568.t1	ShAP2-28	Myc	TCTCTTA	2250	7	+	Arabidopsis thaliana		MYC	Transcription factor
Sh_So04B0190851.t1	ShAP2-29	AE-box	AGAAACAA	206	8	-	Arabidopsis thaliana	part of a module for light response	Light responsiveness	Light responsiveness
Sh_So04B0190851.t1	ShAP2-29	chs-CMA2a	TCACTTGA	224	8	+	Petroselinum crispum	part of a light responsive element	Light responsiveness	Light responsiveness
Sh_So04B0190851.t1	ShAP2-29	Sp1	GGGCGG	1570	6	-	Oryza sativa	light responsive element	Light responsiveness	Light responsiveness
Sh_So04B0190851.t1	ShAP2-29	Gap-box	CAAATGAA(A/G)A	2154	9.5	-	Arabidopsis thaliana	part of a light responsive element	Light responsiveness	Light responsiveness
Sh_So04B0190851.t1	ShAP2-29	Box 4	ATTAAT	897	6	+	Petroselinum crispum	part of a conserved DNA module involved in light responsiveness	Light responsiveness	Light responsiveness
Sh_So04B0190851.t1	ShAP2-29	Box 4	ATTAAT	1979	6	-	Petroselinum crispum	part of a conserved DNA module involved in light responsiveness	Light responsiveness	Light responsiveness
Sh_So04B0190851.t1	ShAP2-29	Box 4	ATTAAT	2173	6	-	Petroselinum crispum	part of a conserved DNA module involved in light responsiveness	Light responsiveness	Light responsiveness
Sh_So04B0190851.t1	ShAP2-29	ATCT-motif	AATCTAATCC	2324	9	+	Pisum sativum	part of a conserved DNA module involved in light responsiveness	Light responsiveness	Light responsiveness
Sh_So04B0190851.t1	ShAP2-29	I-box	TGATAATGT	604	9	+	Solanum tuberosum	part of a light responsive element	Light responsiveness	Light responsiveness
Sh_So04B0190851.t1	ShAP2-29	I-box	GTATAAGGCC	707	9	-	Larix laricina	part of a light responsive element	Light responsiveness	Light responsiveness
Sh_So04B0190851.t1	ShAP2-29	G-box	TACGTG	2014	6	-	Arabidopsis thaliana	cis-acting regulatory element involved in light responsiveness	Light responsiveness	Light responsiveness
Sh_So04B0190851.t1	ShAP2-29	G-box	TACGTG	652	6	+	Arabidopsis thaliana	cis-acting regulatory element involved in light responsiveness	Light responsiveness	Light responsiveness
Sh_So04B0190851.t1	ShAP2-29	AAGAA-motif	GAAAGAA	352	7	-	Avena sativa		abscisic acid responsiveness	Hormone responsiveness
Sh_So04B0190851.t1	ShAP2-29	ERE	ATTTCATA	468	8	+	Nicotiana glutinos		ETH responsiveness	Hormone responsiveness
Sh_So04B0190851.t1	ShAP2-29	CGTCA-motif	CGTCA	747	5	+	Hordeum vulgare	cis-acting regulatory element involved in the MeJA-responsiveness	MeJA responsiveness	Hormone responsiveness
Sh_So04B0190851.t1	ShAP2-29	CGTCA-motif	CGTCA	1209	5	+	Hordeum vulgare	cis-acting regulatory element involved in the MeJA-responsiveness	MeJA responsiveness	Hormone responsiveness
Sh_So04B0190851.t1	ShAP2-29	ABRE	GCAACGTGTC	117	9	-	Hordeum vulgare	cis-acting element involved in the abscisic acid responsiveness	abscisic acid responsiveness	Hormone responsiveness
Sh_So04B0190851.t1	ShAP2-29	ABRE	GACACGTGGC	634	9	-	Triticum aestivum	cis-acting element involved in the abscisic acid responsiveness	abscisic acid responsiveness	Hormone responsiveness
Sh_So04B0190851.t1	ShAP2-29	ABRE	ACGTG	653	5	+	Arabidopsis thaliana	cis-acting element involved in the abscisic acid responsiveness	abscisic acid responsiveness	Hormone responsiveness
Sh_So04B0190851.t1	ShAP2-29	ABRE	CGTACGTGCA	811	9	+	Hordeum vulgare	cis-acting element involved in the abscisic acid responsiveness	abscisic acid responsiveness	Hormone responsiveness
Sh_So04B0190851.t1	ShAP2-29	ABRE	ACGTG	2014	5	-	Arabidopsis thaliana	cis-acting element involved in the abscisic acid responsiveness	abscisic acid responsiveness	Hormone responsiveness
Sh_So04B0190851.t1	ShAP2-29	ABRE4	CACGTA	652	6	-	Zea mays		abscisic acid responsiveness	Hormone responsiveness
Sh_So04B0190851.t1	ShAP2-29	ABRE4	CACGTA	2014	6	+	Zea mays		abscisic acid responsiveness	Hormone responsiveness
Sh_So04B0190851.t1	ShAP2-29	TGACG-motif	TGACG	747	5	-	Hordeum vulgare	cis-acting regulatory element involved in the MeJA-responsiveness	MeJA responsiveness	Hormone responsiveness
Sh_So04B0190851.t1	ShAP2-29	TGACG-motif	TGACG	1209	5	-	Hordeum vulgare	cis-acting regulatory element involved in the MeJA-responsiveness	MeJA responsiveness	Hormone responsiveness
Sh_So04B0190851.t1	ShAP2-29	ABRE3a	TACGTG	2014	6	-	Zea mays		abscisic acid responsiveness	Hormone responsiveness
Sh_So04B0190851.t1	ShAP2-29	ABRE3a	TACGTG	652	6	+	Zea mays		abscisic acid responsiveness	Hormone responsiveness
Sh_So04B0190851.t1	ShAP2-29	CCGTCC-box	CCGTCC	831	6	+	Petroselinum hortense		Meristem specific activation	Development responsiveness
Sh_So04B0190851.t1	ShAP2-29	O2-site	GATGA(C/T)(A/G)TG(A/G)	2349	8.5	-	Zea mays	cis-acting regulatory element involved in zein metabolism regulation	zein metabolism regulation	Development responsiveness
Sh_So04B0190851.t1	ShAP2-29	GCN4_motif	TGAGTCA	493	7	-	Oryza sativa	cis-regulatory element involved in endosperm expression	endosperm	Development responsiveness
Sh_So04B0190851.t1	ShAP2-29	LTR	CCGAAA	355	6	-	Hordeum vulgare	cis-acting element involved in low-temperature responsiveness	low-temperature	Stress responsiveness
Sh_So04B0190851.t1	ShAP2-29	TC-rich repeats	GTTTTCTTAC	2310	9	-	Nicotiana tabacum	cis-acting element involved in defense and stress responsiveness	Defense and stress	Stress responsiveness
Sh_So04B0190851.t1	ShAP2-29	STRE	AGGGG	1453	5	+	Arabidopsis thaliana		Wound responsiveness	Stress responsiveness
Sh_So04B0190851.t1	ShAP2-29	STRE	AGGGG	1594	5	+	Arabidopsis thaliana		Wound responsiveness	Stress responsiveness
Sh_So04B0190851.t1	ShAP2-29	ARE	AAACCA	37	6	-	Zea mays	cis-acting regulatory element essential for the anaerobic induction	anaerobic induction	Stress responsiveness
Sh_So04B0190851.t1	ShAP2-29	ARE	AAACCA	78	6	-	Zea mays	cis-acting regulatory element essential for the anaerobic induction	anaerobic induction	Stress responsiveness
Sh_So04B0190851.t1	ShAP2-29	ARE	AAACCA	105	6	-	Zea mays	cis-acting regulatory element essential for the anaerobic induction	anaerobic induction	Stress responsiveness
Sh_So04B0190851.t1	ShAP2-29	ARE	AAACCA	434	6	+	Zea mays	cis-acting regulatory element essential for the anaerobic induction	anaerobic induction	Stress responsiveness
Sh_So04B0190851.t1	ShAP2-29	ARE	AAACCA	1121	6	-	Zea mays	cis-acting regulatory element essential for the anaerobic induction	anaerobic induction	Stress responsiveness
Sh_So04B0190851.t1	ShAP2-29	ARE	AAACCA	2329	6	+	Zea mays	cis-acting regulatory element essential for the anaerobic induction	anaerobic induction	Stress responsiveness
Sh_So04B0190851.t1	ShAP2-29	MBS	CAACTG	2070	6	+	Arabidopsis thaliana	MYB binding site involved in drought-inducibility	MYB	Transcription factor
Sh_So04B0190851.t1	ShAP2-29	CCAAT-box	CAACGG	369	6	+	Hordeum vulgare	MYBHv1 binding site	MYB	Transcription factor
Sh_So04B0190851.t1	ShAP2-29	CCAAT-box	CAACGG	600	6	-	Hordeum vulgare	MYBHv1 binding site	MYB	Transcription factor
Sh_So04B0190851.t1	ShAP2-29	MBS	CAACTG	33	6	-	Arabidopsis thaliana	MYB binding site involved in drought-inducibility	MYB	Transcription factor
Sh_So04B0190851.t1	ShAP2-29	Myb	TAACTG	1033	6	-	Arabidopsis thaliana		MYB	Transcription factor
Sh_So04B0190851.t1	ShAP2-29	MBS	CAACTG	4	6	+	Arabidopsis thaliana	MYB binding site involved in drought-inducibility	MYB	Transcription factor
Sh_So04B0190851.t1	ShAP2-29	DRE core	GCCGAC	764	6	-	Arabidopsis thaliana		DRE	Transcription factor
Sh_So04B0190851.t1	ShAP2-29	DRE core	GCCGAC	1758	6	+	Arabidopsis thaliana		DRE	Transcription factor
Sh_So04B0190851.t1	ShAP2-29	MYC	CATTTG	1228	6	-	Arabidopsis thaliana		MYC	Transcription factor
Sh_So04B0190851.t1	ShAP2-29	MYC	CATTTG	1753	6	+	Arabidopsis thaliana		MYC	Transcription factor
Sh_So04B0190851.t1	ShAP2-29	MYC	CATTTG	2158	6	+	Arabidopsis thaliana		MYC	Transcription factor
Sh_So04B0190851.t1	ShAP2-29	MYB	CAACCA	981	6	-	Arabidopsis thaliana		MYB	Transcription factor
Sh_So04B0190851.t1	ShAP2-29	MYB	CAACCA	1964	6	+	Arabidopsis thaliana		MYB	Transcription factor
Sh_So04B0190851.t1	ShAP2-29	MYB recognition site	CCGTTG	369	6	-	Arabidopsis thaliana		MYB	Transcription factor
Sh_So04B0190851.t1	ShAP2-29	MYB recognition site	CCGTTG	600	6	+	Arabidopsis thaliana		MYB	Transcription factor
Sh_So04B0190851.t1	ShAP2-29	MBS	CAACTG	716	6	+	Arabidopsis thaliana	MYB binding site involved in drought-inducibility	MYB	Transcription factor
Sh_So04B0190851.t1	ShAP2-29	MBS	CAACTG	74	6	-	Arabidopsis thaliana	MYB binding site involved in drought-inducibility	MYB	Transcription factor
Sh_Ss01A0031173.t1	ShAP2-3	G-box	CACGTG	1035	6	+	Arabidopsis thaliana	cis-acting regulatory element involved in light responsiveness	Light responsiveness	Light responsiveness
Sh_Ss01A0031173.t1	ShAP2-3	G-box	CACGTG	2341	6	-	Arabidopsis thaliana	cis-acting regulatory element involved in light responsiveness	Light responsiveness	Light responsiveness
Sh_Ss01A0031173.t1	ShAP2-3	G-box	ACACGTGT	1034	8	+	Brassica napus	cis-acting regulatory element involved in light responsiveness	Light responsiveness	Light responsiveness
Sh_Ss01A0031173.t1	ShAP2-3	G-box	CACGTC	2129	6	+	Zea mays	cis-acting regulatory element involved in light responsiveness	Light responsiveness	Light responsiveness
Sh_Ss01A0031173.t1	ShAP2-3	Box 4	ATTAAT	77	6	+	Petroselinum crispum	part of a conserved DNA module involved in light responsiveness	Light responsiveness	Light responsiveness
Sh_Ss01A0031173.t1	ShAP2-3	Box 4	ATTAAT	562	6	+	Petroselinum crispum	part of a conserved DNA module involved in light responsiveness	Light responsiveness	Light responsiveness
Sh_Ss01A0031173.t1	ShAP2-3	GT1-motif	GGTTAA	376	6	+	Arabidopsis thaliana	light responsive element	Light responsiveness	Light responsiveness
Sh_Ss01A0031173.t1	ShAP2-3	TCT-motif	TCTTAC	1694	6	-	Arabidopsis thaliana	part of a light responsive element	Light responsiveness	Light responsiveness
Sh_Ss01A0031173.t1	ShAP2-3	G-Box	CACGTT	385	6	+	Pisum sativum	cis-acting regulatory element involved in light responsiveness	Light responsiveness	Light responsiveness
Sh_Ss01A0031173.t1	ShAP2-3	chs-CMA1a	TTACTTAA	1468	8	+	Daucus carota	part of a light responsive element	Light responsiveness	Light responsiveness
Sh_Ss01A0031173.t1	ShAP2-3	ABRE	CACGTG	1035	6	+	Arabidopsis thaliana	cis-acting element involved in the abscisic acid responsiveness	abscisic acid responsiveness	Hormone responsiveness
Sh_Ss01A0031173.t1	ShAP2-3	ABRE	CACGTG	2341	6	-	Arabidopsis thaliana	cis-acting element involved in the abscisic acid responsiveness	abscisic acid responsiveness	Hormone responsiveness
Sh_Ss01A0031173.t1	ShAP2-3	TCA-element	CCATCTTTTT	991	9	+	Nicotiana tabacum	cis-acting element involved in salicylic acid responsiveness	SA responsiveness	Hormone responsiveness
Sh_Ss01A0031173.t1	ShAP2-3	TCA-element	CCATCTTTTT	1718	9	+	Nicotiana tabacum	cis-acting element involved in salicylic acid responsiveness	SA responsiveness	Hormone responsiveness
Sh_Ss01A0031173.t1	ShAP2-3	TGACG-motif	TGACG	961	5	+	Hordeum vulgare	cis-acting regulatory element involved in the MeJA-responsiveness	MeJA responsiveness	Hormone responsiveness
Sh_Ss01A0031173.t1	ShAP2-3	TGACG-motif	TGACG	1519	5	+	Hordeum vulgare	cis-acting regulatory element involved in the MeJA-responsiveness	MeJA responsiveness	Hormone responsiveness
Sh_Ss01A0031173.t1	ShAP2-3	TGACG-motif	TGACG	2131	5	-	Hordeum vulgare	cis-acting regulatory element involved in the MeJA-responsiveness	MeJA responsiveness	Hormone responsiveness
Sh_Ss01A0031173.t1	ShAP2-3	ABRE	ACGTG	385	5	-	Arabidopsis thaliana	cis-acting element involved in the abscisic acid responsiveness	abscisic acid responsiveness	Hormone responsiveness
Sh_Ss01A0031173.t1	ShAP2-3	ABRE	ACGTG	1036	5	+	Arabidopsis thaliana	cis-acting element involved in the abscisic acid responsiveness	abscisic acid responsiveness	Hormone responsiveness
Sh_Ss01A0031173.t1	ShAP2-3	ABRE	ACGTG	2129	5	-	Arabidopsis thaliana	cis-acting element involved in the abscisic acid responsiveness	abscisic acid responsiveness	Hormone responsiveness
Sh_Ss01A0031173.t1	ShAP2-3	ABRE	ACGTG	2342	5	+	Arabidopsis thaliana	cis-acting element involved in the abscisic acid responsiveness	abscisic acid responsiveness	Hormone responsiveness
Sh_Ss01A0031173.t1	ShAP2-3	P-box	CCTTTTG	330	7	+	Oryza sativa	gibberellin-responsive element	GA responsiveness	Hormone responsiveness
Sh_Ss01A0031173.t1	ShAP2-3	P-box	CCTTTTG	1267	7	+	Oryza sativa	gibberellin-responsive element	GA responsiveness	Hormone responsiveness
Sh_Ss01A0031173.t1	ShAP2-3	ERE	ATTTCATA	1869	8	-	Nicotiana glutinos		ETH responsiveness	Hormone responsiveness
Sh_Ss01A0031173.t1	ShAP2-3	TCA	TCATCTTCAT	849	9	+	Pisum sativum		SA responsiveness	Hormone responsiveness
Sh_Ss01A0031173.t1	ShAP2-3	CGTCA-motif	CGTCA	961	5	-	Hordeum vulgare	cis-acting regulatory element involved in the MeJA-responsiveness	MeJA responsiveness	Hormone responsiveness
Sh_Ss01A0031173.t1	ShAP2-3	CGTCA-motif	CGTCA	1519	5	-	Hordeum vulgare	cis-acting regulatory element involved in the MeJA-responsiveness	MeJA responsiveness	Hormone responsiveness
Sh_Ss01A0031173.t1	ShAP2-3	CGTCA-motif	CGTCA	2131	5	+	Hordeum vulgare	cis-acting regulatory element involved in the MeJA-responsiveness	MeJA responsiveness	Hormone responsiveness
Sh_Ss01A0031173.t1	ShAP2-3	GARE-motif	TCTGTTG	1396	7	+	Brassica oleracea	gibberellin-responsive element	GA responsiveness	Hormone responsiveness
Sh_Ss01A0031173.t1	ShAP2-3	AAGAA-motif	GAAAGAA	1261	7	-	Avena sativa		abscisic acid responsiveness	Hormone responsiveness
Sh_Ss01A0031173.t1	ShAP2-3	AAGAA-motif	GAAAGAA	2440	7	-	Avena sativa		abscisic acid responsiveness	Hormone responsiveness
Sh_Ss01A0031173.t1	ShAP2-3	O2-site	GATGA(C/T)(A/G)TG(A/G)	359	8	+	Zea mays	cis-acting regulatory element involved in zein metabolism regulation	zein metabolism regulation	Development responsiveness
Sh_Ss01A0031173.t1	ShAP2-3	CAT-box	GCCACT	120	6	-	Arabidopsis thaliana	cis-acting regulatory element related to meristem expression	Meristem specific activation	Development responsiveness
Sh_Ss01A0031173.t1	ShAP2-3	STRE	AGGGG	582	5	-	Arabidopsis thaliana		Wound responsiveness	Stress responsiveness
Sh_Ss01A0031173.t1	ShAP2-3	STRE	AGGGG	926	5	+	Arabidopsis thaliana		Wound responsiveness	Stress responsiveness
Sh_Ss01A0031173.t1	ShAP2-3	TC-rich repeats	GTTTTCTTAC	138	9	-	Nicotiana tabacum	cis-acting element involved in defense and stress responsiveness	Defense and stress	Stress responsiveness
Sh_Ss01A0031173.t1	ShAP2-3	TC-rich repeats	ATTCTCTAAC	637	9	-	Nicotiana tabacum	cis-acting element involved in defense and stress responsiveness	Defense and stress	Stress responsiveness
Sh_Ss01A0031173.t1	ShAP2-3	TC-rich repeats	ATTCTCTAAC	969	9	-	Nicotiana tabacum	cis-acting element involved in defense and stress responsiveness	Defense and stress	Stress responsiveness
Sh_Ss01A0031173.t1	ShAP2-3	TC-rich repeats	ATTCTCTAAC	1681	9	+	Nicotiana tabacum	cis-acting element involved in defense and stress responsiveness	Defense and stress	Stress responsiveness
Sh_Ss01A0031173.t1	ShAP2-3	WRE3	CCACCT	595	6	-	Pisum sativum		Wound responsiveness	Stress responsiveness
Sh_Ss01A0031173.t1	ShAP2-3	ARE	AAACCA	1480	6	+	Zea mays	cis-acting regulatory element essential for the anaerobic induction	anaerobic induction	Stress responsiveness
Sh_Ss01A0031173.t1	ShAP2-3	ARE	AAACCA	2078	6	-	Zea mays	cis-acting regulatory element essential for the anaerobic induction	anaerobic induction	Stress responsiveness
Sh_Ss01A0031173.t1	ShAP2-3	MYB	CAACAG	1397	6	-	Arabidopsis thaliana		MYB	Transcription factor
Sh_Ss01A0031173.t1	ShAP2-3	MYB	CAACAG	1770	6	+	Arabidopsis thaliana		MYB	Transcription factor
Sh_Ss01A0031173.t1	ShAP2-3	MYB	CAACAG	1886	6	-	Arabidopsis thaliana		MYB	Transcription factor
Sh_Ss01A0031173.t1	ShAP2-3	MYB	CAACAG	319	6	-	Arabidopsis thaliana		MYB	Transcription factor
Sh_Ss01A0031173.t1	ShAP2-3	MBS	CAACTG	67	6	+	Arabidopsis thaliana	MYB binding site involved in drought-inducibility	MYB	Transcription factor
Sh_Ss01A0031173.t1	ShAP2-3	MYB	TAACCA	218	6	-	Arabidopsis thaliana		MYB	Transcription factor
Sh_Ss01A0031173.t1	ShAP2-3	MYC	CATTTG	407	6	+	Arabidopsis thaliana		MYC	Transcription factor
Sh_Ss01A0031173.t1	ShAP2-3	MYC	CATGTG	872	6	+	Arabidopsis thaliana		MYC	Transcription factor
Sh_Ss01A0031173.t1	ShAP2-3	MYC	CATGTG	1277	6	-	Arabidopsis thaliana		MYC	Transcription factor
Sh_Ss01A0031173.t1	ShAP2-3	MYC	CATTTG	1925	6	-	Arabidopsis thaliana		MYC	Transcription factor
Sh_Ss01A0031173.t1	ShAP2-3	DRE core	GCCGAC	877	6	+	Arabidopsis thaliana		DRE	Transcription factor
Sh_Ss01A0031173.t1	ShAP2-3	Myc	TCTCTTA	1707	7	-	Arabidopsis thaliana		MYC	Transcription factor
Sh_Ss01A0031173.t1	ShAP2-3	Myb	TAACTG	316	6	+	Arabidopsis thaliana		MYB	Transcription factor
Sh_Ss01A0031173.t1	ShAP2-3	Myb	TAACTG	1687	6	+	Arabidopsis thaliana		MYB	Transcription factor
Sh_Ss01A0031173.t1	ShAP2-3	W box	TTGACC	11	6	-	Arabidopsis thaliana		WRKY	Transcription factor
Sh_Ss01A0031173.t1	ShAP2-3	W box	TTGACC	693	6	+	Arabidopsis thaliana		WRKY	Transcription factor
Sh_So05C0227391.t1	ShAP2-34	Box 4	ATTAAT	1964	6	-	Petroselinum crispum	part of a conserved DNA module involved in light responsiveness	Light responsiveness	Light responsiveness
Sh_So05C0227391.t1	ShAP2-34	GT1-motif	GGTTAA	214	6	-	Arabidopsis thaliana	light responsive element	Light responsiveness	Light responsiveness
Sh_So05C0227391.t1	ShAP2-34	GT1-motif	GGTTAA	630	6	-	Arabidopsis thaliana	light responsive element	Light responsiveness	Light responsiveness
Sh_So05C0227391.t1	ShAP2-34	Box II	TGGTAATAA	1054	9	-	Solanum tuberosum	part of a light responsive element	Light responsiveness	Light responsiveness
Sh_So05C0227391.t1	ShAP2-34	GATA-motif	AAGGATAAGG	1769	9	-	Solanum tuberosum	part of a light responsive element	Light responsiveness	Light responsiveness
Sh_So05C0227391.t1	ShAP2-34	TCT-motif	TCTTAC	1254	6	-	Arabidopsis thaliana	part of a light responsive element	Light responsiveness	Light responsiveness
Sh_So05C0227391.t1	ShAP2-34	TCT-motif	TCTTAC	2143	6	+	Arabidopsis thaliana	part of a light responsive element	Light responsiveness	Light responsiveness
Sh_So05C0227391.t1	ShAP2-34	TCT-motif	TCTTAC	2160	6	-	Arabidopsis thaliana	part of a light responsive element	Light responsiveness	Light responsiveness
Sh_So05C0227391.t1	ShAP2-34	Gap-box	CAAATGAA(A/G)A	734	9.5	+	Arabidopsis thaliana	part of a light responsive element	Light responsiveness	Light responsiveness
Sh_So05C0227391.t1	ShAP2-34	Gap-box	CAAATGAA(A/G)A	1441	9.5	+	Arabidopsis thaliana	part of a light responsive element	Light responsiveness	Light responsiveness
Sh_So05C0227391.t1	ShAP2-34	G-box	CACGTC	2349	6	+	Zea mays	cis-acting regulatory element involved in light responsiveness	Light responsiveness	Light responsiveness
Sh_So05C0227391.t1	ShAP2-34	G-box	GCCACGTGGA	2380	9	+	Arabidopsis thaliana	cis-acting regulatory element involved in light responsiveness	Light responsiveness	Light responsiveness
Sh_So05C0227391.t1	ShAP2-34	TCCC-motif	TCTCCCT	1330	7	-	Spinacia oleracea	part of a light responsive element	Light responsiveness	Light responsiveness
Sh_So05C0227391.t1	ShAP2-34	Sp1	GGGCGG	340	6	+	Oryza sativa	light responsive element	Light responsiveness	Light responsiveness
Sh_So05C0227391.t1	ShAP2-34	Sp1	GGGCGG	390	6	+	Oryza sativa	light responsive element	Light responsiveness	Light responsiveness
Sh_So05C0227391.t1	ShAP2-34	Sp1	GGGCGG	429	6	+	Oryza sativa	light responsive element	Light responsiveness	Light responsiveness
Sh_So05C0227391.t1	ShAP2-34	G-box	CACGTG	571	6	+	Arabidopsis thaliana	cis-acting regulatory element involved in light responsiveness	Light responsiveness	Light responsiveness
Sh_So05C0227391.t1	ShAP2-34	G-box	TACGTG	1996	6	-	Arabidopsis thaliana	cis-acting regulatory element involved in light responsiveness	Light responsiveness	Light responsiveness
Sh_So05C0227391.t1	ShAP2-34	TGACG-motif	TGACG	1169	5	+	Hordeum vulgare	cis-acting regulatory element involved in the MeJA-responsiveness	MeJA responsiveness	Hormone responsiveness
Sh_So05C0227391.t1	ShAP2-34	TGACG-motif	TGACG	2225	5	+	Hordeum vulgare	cis-acting regulatory element involved in the MeJA-responsiveness	MeJA responsiveness	Hormone responsiveness
Sh_So05C0227391.t1	ShAP2-34	TGACG-motif	TGACG	2268	5	-	Hordeum vulgare	cis-acting regulatory element involved in the MeJA-responsiveness	MeJA responsiveness	Hormone responsiveness
Sh_So05C0227391.t1	ShAP2-34	TGACG-motif	TGACG	2452	5	-	Hordeum vulgare	cis-acting regulatory element involved in the MeJA-responsiveness	MeJA responsiveness	Hormone responsiveness
Sh_So05C0227391.t1	ShAP2-34	GARE-motif	TCTGTTG	809	7	+	Brassica oleracea	gibberellin-responsive element	GA responsiveness	Hormone responsiveness
Sh_So05C0227391.t1	ShAP2-34	ERE	ATTTTAAA	833	8	+	Nicotiana glutinos		ETH responsiveness	Hormone responsiveness
Sh_So05C0227391.t1	ShAP2-34	ERE	ATTTTAAA	835	8	-	Nicotiana glutinos		ETH responsiveness	Hormone responsiveness
Sh_So05C0227391.t1	ShAP2-34	ERE	ATTTTAAA	879	8	+	Nicotiana glutinos		ETH responsiveness	Hormone responsiveness
Sh_So05C0227391.t1	ShAP2-34	ERE	ATTTTAAA	1394	8	+	Nicotiana glutinos		ETH responsiveness	Hormone responsiveness
Sh_So05C0227391.t1	ShAP2-34	ERE	ATTTTAAA	1396	8	-	Nicotiana glutinos		ETH responsiveness	Hormone responsiveness
Sh_So05C0227391.t1	ShAP2-34	ABRE	ACGTG	572	5	+	Arabidopsis thaliana	cis-acting element involved in the abscisic acid responsiveness	abscisic acid responsiveness	Hormone responsiveness
Sh_So05C0227391.t1	ShAP2-34	ABRE	ACGTG	1996	5	-	Arabidopsis thaliana	cis-acting element involved in the abscisic acid responsiveness	abscisic acid responsiveness	Hormone responsiveness
Sh_So05C0227391.t1	ShAP2-34	ABRE	ACGTG	2349	5	-	Arabidopsis thaliana	cis-acting element involved in the abscisic acid responsiveness	abscisic acid responsiveness	Hormone responsiveness
Sh_So05C0227391.t1	ShAP2-34	ABRE	CGCACGTGTC	2388	9	-	Hordeum vulgare	cis-acting element involved in the abscisic acid responsiveness	abscisic acid responsiveness	Hormone responsiveness
Sh_So05C0227391.t1	ShAP2-34	P-box	CCTTTTG	2298	7	+	Oryza sativa	gibberellin-responsive element	GA responsiveness	Hormone responsiveness
Sh_So05C0227391.t1	ShAP2-34	ABRE4	CACGTA	1996	6	+	Zea mays		abscisic acid responsiveness	Hormone responsiveness
Sh_So05C0227391.t1	ShAP2-34	AAGAA-motif	GAAAGAA	310	7	-	Avena sativa		abscisic acid responsiveness	Hormone responsiveness
Sh_So05C0227391.t1	ShAP2-34	AAGAA-motif	GAAAGAA	2103	7	+	Avena sativa		abscisic acid responsiveness	Hormone responsiveness
Sh_So05C0227391.t1	ShAP2-34	CGTCA-motif	CGTCA	1169	5	-	Hordeum vulgare	cis-acting regulatory element involved in the MeJA-responsiveness	MeJA responsiveness	Hormone responsiveness
Sh_So05C0227391.t1	ShAP2-34	CGTCA-motif	CGTCA	2225	5	-	Hordeum vulgare	cis-acting regulatory element involved in the MeJA-responsiveness	MeJA responsiveness	Hormone responsiveness
Sh_So05C0227391.t1	ShAP2-34	CGTCA-motif	CGTCA	2268	5	+	Hordeum vulgare	cis-acting regulatory element involved in the MeJA-responsiveness	MeJA responsiveness	Hormone responsiveness
Sh_So05C0227391.t1	ShAP2-34	CGTCA-motif	CGTCA	2452	5	+	Hordeum vulgare	cis-acting regulatory element involved in the MeJA-responsiveness	MeJA responsiveness	Hormone responsiveness
Sh_So05C0227391.t1	ShAP2-34	ABRE	CACGTG	571	6	+	Arabidopsis thaliana	cis-acting element involved in the abscisic acid responsiveness	abscisic acid responsiveness	Hormone responsiveness
Sh_So05C0227391.t1	ShAP2-34	ABRE3a	TACGTG	1996	6	-	Zea mays		abscisic acid responsiveness	Hormone responsiveness
Sh_So05C0227391.t1	ShAP2-34	circadian	CAAAGATATC	1717	9	-	Lycopersicon esculentum	cis-acting regulatory element involved in circadian control	circadian control	Development responsiveness
Sh_So05C0227391.t1	ShAP2-34	GCN4_motif	TGAGTCA	2014	7	+	Oryza sativa	cis-regulatory element involved in endosperm expression	endosperm	Development responsiveness
Sh_So05C0227391.t1	ShAP2-34	CAT-box	GCCACT	1610	6	-	Arabidopsis thaliana	cis-acting regulatory element related to meristem expression	Meristem specific activation	Development responsiveness
Sh_So05C0227391.t1	ShAP2-34	CAT-box	GCCACT	2376	6	-	Arabidopsis thaliana	cis-acting regulatory element related to meristem expression	Meristem specific activation	Development responsiveness
Sh_So05C0227391.t1	ShAP2-34	WRE3	CCACCT	499	6	-	Pisum sativum		Wound responsiveness	Stress responsiveness
Sh_So05C0227391.t1	ShAP2-34	WRE3	CCACCT	1000	6	+	Pisum sativum		Wound responsiveness	Stress responsiveness
Sh_So05C0227391.t1	ShAP2-34	STRE	AGGGG	338	5	+	Arabidopsis thaliana		Wound responsiveness	Stress responsiveness
Sh_So05C0227391.t1	ShAP2-34	STRE	AGGGG	387	5	+	Arabidopsis thaliana		Wound responsiveness	Stress responsiveness
Sh_So05C0227391.t1	ShAP2-34	STRE	AGGGG	427	5	+	Arabidopsis thaliana		Wound responsiveness	Stress responsiveness
Sh_So05C0227391.t1	ShAP2-34	STRE	AGGGG	1586	5	-	Arabidopsis thaliana		Wound responsiveness	Stress responsiveness
Sh_So05C0227391.t1	ShAP2-34	STRE	AGGGG	1632	5	-	Arabidopsis thaliana		Wound responsiveness	Stress responsiveness
Sh_So05C0227391.t1	ShAP2-34	STRE	AGGGG	1679	5	+	Arabidopsis thaliana		Wound responsiveness	Stress responsiveness
Sh_So05C0227391.t1	ShAP2-34	STRE	AGGGG	1767	5	-	Arabidopsis thaliana		Wound responsiveness	Stress responsiveness
Sh_So05C0227391.t1	ShAP2-34	STRE	AGGGG	1797	5	+	Arabidopsis thaliana		Wound responsiveness	Stress responsiveness
Sh_So05C0227391.t1	ShAP2-34	STRE	AGGGG	2343	5	-	Arabidopsis thaliana		Wound responsiveness	Stress responsiveness
Sh_So05C0227391.t1	ShAP2-34	GC-motif	CCCCCG	2310	6	+	Zea mays	enhancer-like element involved in anoxic specific inducibility	anaerobic induction	Stress responsiveness
Sh_So05C0227391.t1	ShAP2-34	GC-motif	CCCCCG	2467	6	+	Zea mays	enhancer-like element involved in anoxic specific inducibility	anaerobic induction	Stress responsiveness
Sh_So05C0227391.t1	ShAP2-34	ARE	AAACCA	1338	6	+	Zea mays	cis-acting regulatory element essential for the anaerobic induction	anaerobic induction	Stress responsiveness
Sh_So05C0227391.t1	ShAP2-34	ARE	AAACCA	2277	6	+	Zea mays	cis-acting regulatory element essential for the anaerobic induction	anaerobic induction	Stress responsiveness
Sh_So05C0227391.t1	ShAP2-34	ARE	AAACCA	2303	6	-	Zea mays	cis-acting regulatory element essential for the anaerobic induction	anaerobic induction	Stress responsiveness
Sh_So05C0227391.t1	ShAP2-34	MYB	CAACAG	810	6	-	Arabidopsis thaliana		MYB	Transcription factor
Sh_So05C0227391.t1	ShAP2-34	MBS	CAACTG	1142	6	-	Arabidopsis thaliana	MYB binding site involved in drought-inducibility	MYB	Transcription factor
Sh_So05C0227391.t1	ShAP2-34	Myc	TCTCTTA	1023	7	-	Arabidopsis thaliana		MYC	Transcription factor
Sh_So05C0227391.t1	ShAP2-34	MYB	CAACCA	97	6	+	Arabidopsis thaliana		MYB	Transcription factor
Sh_So05C0227391.t1	ShAP2-34	MYB	CAACCA	178	6	+	Arabidopsis thaliana		MYB	Transcription factor
Sh_So05C0227391.t1	ShAP2-34	MYB	CAACCA	255	6	+	Arabidopsis thaliana		MYB	Transcription factor
Sh_So05C0227391.t1	ShAP2-34	MYB	CAACCA	516	6	+	Arabidopsis thaliana		MYB	Transcription factor
Sh_So05C0227391.t1	ShAP2-34	MRE	AACCTAA	116	7	+	Petroselinum crispum	MYB binding site involved in light responsiveness	MYB	Transcription factor
Sh_So05C0227391.t1	ShAP2-34	Myb	TAACTG	1342	6	-	Arabidopsis thaliana		MYB	Transcription factor
Sh_So05C0227391.t1	ShAP2-34	MYC	CATTTG	80	6	+	Arabidopsis thaliana		MYC	Transcription factor
Sh_So05C0227391.t1	ShAP2-34	MYC	CATGTG	520	6	-	Arabidopsis thaliana		MYC	Transcription factor
Sh_So05C0227391.t1	ShAP2-34	MYC	CATTTG	734	6	-	Arabidopsis thaliana		MYC	Transcription factor
Sh_So05C0227391.t1	ShAP2-34	MYC	CATTTG	986	6	-	Arabidopsis thaliana		MYC	Transcription factor
Sh_So05C0227391.t1	ShAP2-34	MYC	CATGTG	1225	6	-	Arabidopsis thaliana		MYC	Transcription factor
Sh_So05C0227391.t1	ShAP2-34	MYC	CATTTG	1441	6	-	Arabidopsis thaliana		MYC	Transcription factor
Sh_So05C0227391.t1	ShAP2-34	MYC	CATTTG	1638	6	-	Arabidopsis thaliana		MYC	Transcription factor
Sh_So05C0227391.t1	ShAP2-34	MYC	CATTTG	1672	6	+	Arabidopsis thaliana		MYC	Transcription factor
Sh_So05C0227391.t1	ShAP2-34	MYC	CATGTG	2382	6	-	Arabidopsis thaliana		MYC	Transcription factor
Sh_So05C0227391.t1	ShAP2-34	W box	TTGACC	513	6	-	Arabidopsis thaliana		WRKY	Transcription factor
Sh_So05C0227391.t1	ShAP2-34	DRE1	ACCGAGA	2406	7	+	Zea mays		DRE	Transcription factor
Sh_So05C0227391.t1	ShAP2-34	MYB	TAACCA	215	6	+	Arabidopsis thaliana		MYB	Transcription factor
Sh_So05C0227391.t1	ShAP2-34	MYB	TAACCA	56	6	-	Arabidopsis thaliana		MYB	Transcription factor
Sh_So05C0227391.t1	ShAP2-34	MYB	TAACCA	631	6	+	Arabidopsis thaliana		MYB	Transcription factor
Sh_So06K0263924.t1	ShAP2-36	G-box	CACGAC	943	6	-	Zea mays	cis-acting regulatory element involved in light responsiveness	Light responsiveness	Light responsiveness
Sh_So06K0263924.t1	ShAP2-36	ATC-motif	AGCTATCCA	468	9	-	Arabidopsis thaliana	part of a conserved DNA module involved in light responsiveness	Light responsiveness	Light responsiveness
Sh_So06K0263924.t1	ShAP2-36	TCT-motif	TCTTAC	2036	6	-	Arabidopsis thaliana	part of a light responsive element	Light responsiveness	Light responsiveness
Sh_So06K0263924.t1	ShAP2-36	Sp1	GGGCGG	1808	6	-	Oryza sativa	light responsive element	Light responsiveness	Light responsiveness
Sh_So06K0263924.t1	ShAP2-36	Sp1	GGGCGG	1956	6	+	Oryza sativa	light responsive element	Light responsiveness	Light responsiveness
Sh_So06K0263924.t1	ShAP2-36	Sp1	GGGCGG	1968	6	+	Oryza sativa	light responsive element	Light responsiveness	Light responsiveness
Sh_So06K0263924.t1	ShAP2-36	Sp1	GGGCGG	2003	6	-	Oryza sativa	light responsive element	Light responsiveness	Light responsiveness
Sh_So06K0263924.t1	ShAP2-36	Sp1	GGGCGG	2166	6	+	Oryza sativa	light responsive element	Light responsiveness	Light responsiveness
Sh_So06K0263924.t1	ShAP2-36	P-box	CCTTTTG	1030	7	+	Oryza sativa	gibberellin-responsive element	GA responsiveness	Hormone responsiveness
Sh_So06K0263924.t1	ShAP2-36	ABRE	GCCGCGTGGC	1465	9	-	Oryza sativa	cis-acting element involved in the abscisic acid responsiveness	abscisic acid responsiveness	Hormone responsiveness
Sh_So06K0263924.t1	ShAP2-36	TGA-element	AACGAC	1535	6	-	Brassica oleracea	auxin-responsive element	Auxin responsiveness	Hormone responsiveness
Sh_So06K0263924.t1	ShAP2-36	TGACG-motif	TGACG	166	5	-	Hordeum vulgare	cis-acting regulatory element involved in the MeJA-responsiveness	MeJA responsiveness	Hormone responsiveness
Sh_So06K0263924.t1	ShAP2-36	TGACG-motif	TGACG	951	5	+	Hordeum vulgare	cis-acting regulatory element involved in the MeJA-responsiveness	MeJA responsiveness	Hormone responsiveness
Sh_So06K0263924.t1	ShAP2-36	CGTCA-motif	CGTCA	166	5	+	Hordeum vulgare	cis-acting regulatory element involved in the MeJA-responsiveness	MeJA responsiveness	Hormone responsiveness
Sh_So06K0263924.t1	ShAP2-36	CGTCA-motif	CGTCA	951	5	-	Hordeum vulgare	cis-acting regulatory element involved in the MeJA-responsiveness	MeJA responsiveness	Hormone responsiveness
Sh_So06K0263924.t1	ShAP2-36	GARE-motif	TCTGTTG	221	7	-	Brassica oleracea	gibberellin-responsive element	GA responsiveness	Hormone responsiveness
Sh_So06K0263924.t1	ShAP2-36	GARE-motif	TCTGTTG	479	7	+	Brassica oleracea	gibberellin-responsive element	GA responsiveness	Hormone responsiveness
Sh_So06K0263924.t1	ShAP2-36	F-box	CTATTCTCATT	900	10	-	Lycopersicon esculentum		GA responsiveness	Hormone responsiveness
Sh_So06K0263924.t1	ShAP2-36	GCN4_motif	TGAGTCA	727	7	-	Oryza sativa	cis-regulatory element involved in endosperm expression	endosperm	Development responsiveness
Sh_So06K0263924.t1	ShAP2-36	CCGTCC-box	CCGTCC	683	6	+	Petroselinum hortense		Meristem specific activation	Development responsiveness
Sh_So06K0263924.t1	ShAP2-36	CCGTCC-box	CCGTCC	922	6	-	Petroselinum hortense		Meristem specific activation	Development responsiveness
Sh_So06K0263924.t1	ShAP2-36	CCGTCC-box	CCGTCC	2170	6	-	Petroselinum hortense		Meristem specific activation	Development responsiveness
Sh_So06K0263924.t1	ShAP2-36	CAT-box	GCCACT	1124	6	+	Arabidopsis thaliana	cis-acting regulatory element related to meristem expression	Meristem specific activation	Development responsiveness
Sh_So06K0263924.t1	ShAP2-36	RY-element	CATGCATG	184	8	+	Helianthus annuus	cis-acting regulatory element involved in seed-specific regulation	seed-specific regulation	Development responsiveness
Sh_So06K0263924.t1	ShAP2-36	RY-element	CATGCATG	1374	8	-	Helianthus annuus	cis-acting regulatory element involved in seed-specific regulation	seed-specific regulation	Development responsiveness
Sh_So06K0263924.t1	ShAP2-36	RY-element	CATGCATG	1475	8	-	Helianthus annuus	cis-acting regulatory element involved in seed-specific regulation	seed-specific regulation	Development responsiveness
Sh_So06K0263924.t1	ShAP2-36	RY-element	CATGCATG	1479	8	-	Helianthus annuus	cis-acting regulatory element involved in seed-specific regulation	seed-specific regulation	Development responsiveness
Sh_So06K0263924.t1	ShAP2-36	RY-element	CATGCATG	1903	8	-	Helianthus annuus	cis-acting regulatory element involved in seed-specific regulation	seed-specific regulation	Development responsiveness
Sh_So06K0263924.t1	ShAP2-36	WRE3	CCACCT	1027	6	+	Pisum sativum		Wound responsiveness	Stress responsiveness
Sh_So06K0263924.t1	ShAP2-36	WRE3	CCACCT	2030	6	+	Pisum sativum		Wound responsiveness	Stress responsiveness
Sh_So06K0263924.t1	ShAP2-36	TC-rich repeats	ATTCTCTAAC	802	9	+	Nicotiana tabacum	cis-acting element involved in defense and stress responsiveness	Defense and stress	Stress responsiveness
Sh_So06K0263924.t1	ShAP2-36	STRE	AGGGG	1449	5	-	Arabidopsis thaliana		Wound responsiveness	Stress responsiveness
Sh_So06K0263924.t1	ShAP2-36	STRE	AGGGG	1893	5	+	Arabidopsis thaliana		Wound responsiveness	Stress responsiveness
Sh_So06K0263924.t1	ShAP2-36	STRE	AGGGG	1974	5	-	Arabidopsis thaliana		Wound responsiveness	Stress responsiveness
Sh_So06K0263924.t1	ShAP2-36	STRE	AGGGG	2216	5	-	Arabidopsis thaliana		Wound responsiveness	Stress responsiveness
Sh_So06K0263924.t1	ShAP2-36	ARE	AAACCA	2249	6	+	Zea mays	cis-acting regulatory element essential for the anaerobic induction	anaerobic induction	Stress responsiveness
Sh_So06K0263924.t1	ShAP2-36	MYB	CAACAG	221	6	+	Arabidopsis thaliana		MYB	Transcription factor
Sh_So06K0263924.t1	ShAP2-36	MYB	CAACAG	416	6	-	Arabidopsis thaliana		MYB	Transcription factor
Sh_So06K0263924.t1	ShAP2-36	MYB	CAACAG	480	6	-	Arabidopsis thaliana		MYB	Transcription factor
Sh_So06K0263924.t1	ShAP2-36	MYC	CATGTG	341	6	-	Arabidopsis thaliana		MYC	Transcription factor
Sh_So06K0263924.t1	ShAP2-36	MYC	CATTTG	622	6	-	Arabidopsis thaliana		MYC	Transcription factor
Sh_So06K0263924.t1	ShAP2-36	MYC	CAATTG	992	6	+	Arabidopsis thaliana		MYC	Transcription factor
Sh_So06K0263924.t1	ShAP2-36	MYC	CATGTG	1460	6	+	Arabidopsis thaliana		MYC	Transcription factor
Sh_So06K0263924.t1	ShAP2-36	MYC	CATTTG	1677	6	-	Arabidopsis thaliana		MYC	Transcription factor
Sh_So06K0263924.t1	ShAP2-36	MYC	CATGTG	1703	6	-	Arabidopsis thaliana		MYC	Transcription factor
Sh_So06K0263924.t1	ShAP2-36	MYB	CAACCA	180	6	+	Arabidopsis thaliana		MYB	Transcription factor
Sh_So06K0263924.t1	ShAP2-36	MYB	CAACCA	285	6	+	Arabidopsis thaliana		MYB	Transcription factor
Sh_So06K0263924.t1	ShAP2-36	MYB	CAACCA	1769	6	-	Arabidopsis thaliana		MYB	Transcription factor
Sh_So06K0263924.t1	ShAP2-36	W box	TTGACC	737	6	+	Arabidopsis thaliana		WRKY	Transcription factor
Sh_So06K0263924.t1	ShAP2-36	W box	TTGACC	1992	6	-	Arabidopsis thaliana		WRKY	Transcription factor
Sh_So06K0263924.t1	ShAP2-36	DRE1	ACCGAGA	977	7	-	Zea mays		DRE	Transcription factor
Sh_So06K0263924.t1	ShAP2-36	MYC	CATGTG	573	6	-	Arabidopsis thaliana		MYC	Transcription factor
Sh_So09B0313864.t1	ShAP2-38	G-box	CACGTG	554	6	+	Arabidopsis thaliana	cis-acting regulatory element involved in light responsiveness	Light responsiveness	Light responsiveness
Sh_So09B0313864.t1	ShAP2-38	G-box	CACGTC	1627	6	+	Zea mays	cis-acting regulatory element involved in light responsiveness	Light responsiveness	Light responsiveness
Sh_So09B0313864.t1	ShAP2-38	I-box	cGATAAGGCG	2242	9	-	Zea mays	part of a light responsive element	Light responsiveness	Light responsiveness
Sh_So09B0313864.t1	ShAP2-38	Sp1	GGGCGG	1861	6	-	Oryza sativa	light responsive element	Light responsiveness	Light responsiveness
Sh_So09B0313864.t1	ShAP2-38	Sp1	GGGCGG	1973	6	-	Oryza sativa	light responsive element	Light responsiveness	Light responsiveness
Sh_So09B0313864.t1	ShAP2-38	G-box	TACGTG	1632	6	-	Arabidopsis thaliana	cis-acting regulatory element involved in light responsiveness	Light responsiveness	Light responsiveness
Sh_So09B0313864.t1	ShAP2-38	ABRE	CACGTG	554	6	+	Arabidopsis thaliana	cis-acting element involved in the abscisic acid responsiveness	abscisic acid responsiveness	Hormone responsiveness
Sh_So09B0313864.t1	ShAP2-38	AAGAA-motif	GAAAGAA	1263	7	-	Avena sativa		abscisic acid responsiveness	Hormone responsiveness
Sh_So09B0313864.t1	ShAP2-38	ABRE	ACGTG	555	5	+	Arabidopsis thaliana	cis-acting element involved in the abscisic acid responsiveness	abscisic acid responsiveness	Hormone responsiveness
Sh_So09B0313864.t1	ShAP2-38	ABRE	ACGTG	1627	5	-	Arabidopsis thaliana	cis-acting element involved in the abscisic acid responsiveness	abscisic acid responsiveness	Hormone responsiveness
Sh_So09B0313864.t1	ShAP2-38	ABRE	ACGTG	1632	5	-	Arabidopsis thaliana	cis-acting element involved in the abscisic acid responsiveness	abscisic acid responsiveness	Hormone responsiveness
Sh_So09B0313864.t1	ShAP2-38	TGA-element	AACGAC	339	6	-	Brassica oleracea	auxin-responsive element	Auxin responsiveness	Hormone responsiveness
Sh_So09B0313864.t1	ShAP2-38	TGA-element	AACGAC	867	6	-	Brassica oleracea	auxin-responsive element	Auxin responsiveness	Hormone responsiveness
Sh_So09B0313864.t1	ShAP2-38	TGA-element	AACGAC	2452	6	-	Brassica oleracea	auxin-responsive element	Auxin responsiveness	Hormone responsiveness
Sh_So09B0313864.t1	ShAP2-38	ABRE4	CACGTA	1632	6	+	Zea mays		abscisic acid responsiveness	Hormone responsiveness
Sh_So09B0313864.t1	ShAP2-38	TCA-element	CCATCTTTTT	241	9	+	Nicotiana tabacum	cis-acting element involved in salicylic acid responsiveness	SA responsiveness	Hormone responsiveness
Sh_So09B0313864.t1	ShAP2-38	TCA-element	CCATCTTTTT	1462	10	+	Nicotiana tabacum	cis-acting element involved in salicylic acid responsiveness	SA responsiveness	Hormone responsiveness
Sh_So09B0313864.t1	ShAP2-38	CGTCA-motif	CGTCA	384	5	+	Hordeum vulgare	cis-acting regulatory element involved in the MeJA-responsiveness	MeJA responsiveness	Hormone responsiveness
Sh_So09B0313864.t1	ShAP2-38	CGTCA-motif	CGTCA	1629	5	+	Hordeum vulgare	cis-acting regulatory element involved in the MeJA-responsiveness	MeJA responsiveness	Hormone responsiveness
Sh_So09B0313864.t1	ShAP2-38	CGTCA-motif	CGTCA	1979	5	-	Hordeum vulgare	cis-acting regulatory element involved in the MeJA-responsiveness	MeJA responsiveness	Hormone responsiveness
Sh_So09B0313864.t1	ShAP2-38	TGACG-motif	TGACG	384	5	-	Hordeum vulgare	cis-acting regulatory element involved in the MeJA-responsiveness	MeJA responsiveness	Hormone responsiveness
Sh_So09B0313864.t1	ShAP2-38	TGACG-motif	TGACG	1629	5	-	Hordeum vulgare	cis-acting regulatory element involved in the MeJA-responsiveness	MeJA responsiveness	Hormone responsiveness
Sh_So09B0313864.t1	ShAP2-38	TGACG-motif	TGACG	1979	5	+	Hordeum vulgare	cis-acting regulatory element involved in the MeJA-responsiveness	MeJA responsiveness	Hormone responsiveness
Sh_So09B0313864.t1	ShAP2-38	ABRE3a	TACGTG	1632	6	-	Zea mays		abscisic acid responsiveness	Hormone responsiveness
Sh_So09B0313864.t1	ShAP2-38	CAT-box	GCCACT	215	6	-	Arabidopsis thaliana	cis-acting regulatory element related to meristem expression	Meristem specific activation	Development responsiveness
Sh_So09B0313864.t1	ShAP2-38	CAT-box	GCCACT	1569	6	+	Arabidopsis thaliana	cis-acting regulatory element related to meristem expression	Meristem specific activation	Development responsiveness
Sh_So09B0313864.t1	ShAP2-38	CCGTCC-box	CCGTCC	293	6	+	Petroselinum hortense		Meristem specific activation	Development responsiveness
Sh_So09B0313864.t1	ShAP2-38	CCGTCC-box	CCGTCC	1544	6	-	Petroselinum hortense		Meristem specific activation	Development responsiveness
Sh_So09B0313864.t1	ShAP2-38	STRE	AGGGG	528	5	-	Arabidopsis thaliana		Wound responsiveness	Stress responsiveness
Sh_So09B0313864.t1	ShAP2-38	STRE	AGGGG	1168	5	+	Arabidopsis thaliana		Wound responsiveness	Stress responsiveness
Sh_So09B0313864.t1	ShAP2-38	TC-rich repeats	ATTCTCTAAC	1114	9	-	Nicotiana tabacum	cis-acting element involved in defense and stress responsiveness	Defense and stress	Stress responsiveness
Sh_So09B0313864.t1	ShAP2-38	LTR	CCGAAA	392	6	-	Hordeum vulgare	cis-acting element involved in low-temperature responsiveness	low-temperature	Stress responsiveness
Sh_So09B0313864.t1	ShAP2-38	WRE3	CCACCT	2123	6	+	Pisum sativum		Wound responsiveness	Stress responsiveness
Sh_So09B0313864.t1	ShAP2-38	ARE	AAACCA	1992	6	+	Zea mays	cis-acting regulatory element essential for the anaerobic induction	anaerobic induction	Stress responsiveness
Sh_So09B0313864.t1	ShAP2-38	ARE	AAACCA	2232	6	+	Zea mays	cis-acting regulatory element essential for the anaerobic induction	anaerobic induction	Stress responsiveness
Sh_So09B0313864.t1	ShAP2-38	GC-motif	CCCCCG	194	6	-	Zea mays	enhancer-like element involved in anoxic specific inducibility	anaerobic induction	Stress responsiveness
Sh_So09B0313864.t1	ShAP2-38	MYB	CAACAG	1790	6	-	Arabidopsis thaliana		MYB	Transcription factor
Sh_So09B0313864.t1	ShAP2-38	MBS	CAACTG	1784	6	-	Arabidopsis thaliana	MYB binding site involved in drought-inducibility	MYB	Transcription factor
Sh_So09B0313864.t1	ShAP2-38	MBS	CAACTG	533	6	+	Arabidopsis thaliana	MYB binding site involved in drought-inducibility	MYB	Transcription factor
Sh_So09B0313864.t1	ShAP2-38	MBS	CAACTG	715	6	-	Arabidopsis thaliana	MYB binding site involved in drought-inducibility	MYB	Transcription factor
Sh_So09B0313864.t1	ShAP2-38	MBS	CAACTG	914	6	+	Arabidopsis thaliana	MYB binding site involved in drought-inducibility	MYB	Transcription factor
Sh_So09B0313864.t1	ShAP2-38	MYC	CATTTG	319	6	+	Arabidopsis thaliana		MYC	Transcription factor
Sh_So09B0313864.t1	ShAP2-38	MYC	CATGTG	744	6	+	Arabidopsis thaliana		MYC	Transcription factor
Sh_So09B0313864.t1	ShAP2-38	MYC	CATGTG	774	6	-	Arabidopsis thaliana		MYC	Transcription factor
Sh_So09B0313864.t1	ShAP2-38	MYC	CATGTG	1408	6	-	Arabidopsis thaliana		MYC	Transcription factor
Sh_So09B0313864.t1	ShAP2-38	MYC	CATTTG	1771	6	-	Arabidopsis thaliana		MYC	Transcription factor
Sh_So09B0313864.t1	ShAP2-38	DRE core	GCCGAC	1653	6	-	Arabidopsis thaliana		DRE	Transcription factor
Sh_So09B0313864.t1	ShAP2-38	MBSI	TTTTTACGGTTA	2074	11	-	Petunia hybrida	MYB binding site involved in flavonoid biosynthetic genes regulation	MYB	Transcription factor
Sh_So09B0313864.t1	ShAP2-38	CCAAT-box	CAACGG	1509	6	-	Hordeum vulgare	MYBHv1 binding site	MYB	Transcription factor
Sh_So09B0313864.t1	ShAP2-38	DRE1	ACCGAGA	302	7	-	Zea mays		DRE	Transcription factor
Sh_So09B0313864.t1	ShAP2-38	Myc	TCTCTTA	14	7	-	Arabidopsis thaliana		MYC	Transcription factor
Sh_So09B0313864.t1	ShAP2-38	MYB	CAACCA	606	6	+	Arabidopsis thaliana		MYB	Transcription factor
Sh_So09B0313864.t1	ShAP2-38	MYB	CAACCA	1803	6	+	Arabidopsis thaliana		MYB	Transcription factor
Sh_So09B0313864.t1	ShAP2-38	MYB recognition site	CCGTTG	1509	6	+	Arabidopsis thaliana		MYB	Transcription factor
Sh_So09B0313864.t1	ShAP2-38	MYB	TAACCA	139	6	+	Arabidopsis thaliana		MYB	Transcription factor
Sh_So09B0313864.t1	ShAP2-38	MYB	TAACCA	928	6	-	Arabidopsis thaliana		MYB	Transcription factor
Sh_Ss01A0029784.t1	ShAP2-4	G-box	CACGTG	1881	6	-	Arabidopsis thaliana	cis-acting regulatory element involved in light responsiveness	Light responsiveness	Light responsiveness
Sh_Ss01A0029784.t1	ShAP2-4	Box 4	ATTAAT	1971	6	-	Petroselinum crispum	part of a conserved DNA module involved in light responsiveness	Light responsiveness	Light responsiveness
Sh_Ss01A0029784.t1	ShAP2-4	GT1-motif	GGTTAA	661	6	+	Arabidopsis thaliana	light responsive element	Light responsiveness	Light responsiveness
Sh_Ss01A0029784.t1	ShAP2-4	GT1-motif	GGTTAA	936	6	-	Arabidopsis thaliana	light responsive element	Light responsiveness	Light responsiveness
Sh_Ss01A0029784.t1	ShAP2-4	GT1-motif	GGTTAA	1804	6	-	Arabidopsis thaliana	light responsive element	Light responsiveness	Light responsiveness
Sh_Ss01A0029784.t1	ShAP2-4	GT1-motif	GGTTAA	1958	6	+	Arabidopsis thaliana	light responsive element	Light responsiveness	Light responsiveness
Sh_Ss01A0029784.t1	ShAP2-4	G-box	CACGTC	118	6	+	Zea mays	cis-acting regulatory element involved in light responsiveness	Light responsiveness	Light responsiveness
Sh_Ss01A0029784.t1	ShAP2-4	G-box	CACGAC	1437	6	+	Zea mays	cis-acting regulatory element involved in light responsiveness	Light responsiveness	Light responsiveness
Sh_Ss01A0029784.t1	ShAP2-4	G-box	CACGAC	2244	6	+	Zea mays	cis-acting regulatory element involved in light responsiveness	Light responsiveness	Light responsiveness
Sh_Ss01A0029784.t1	ShAP2-4	Sp1	GGGCGG	514	6	+	Oryza sativa	light responsive element	Light responsiveness	Light responsiveness
Sh_Ss01A0029784.t1	ShAP2-4	Sp1	GGGCGG	518	6	+	Oryza sativa	light responsive element	Light responsiveness	Light responsiveness
Sh_Ss01A0029784.t1	ShAP2-4	Sp1	GGGCGG	522	6	+	Oryza sativa	light responsive element	Light responsiveness	Light responsiveness
Sh_Ss01A0029784.t1	ShAP2-4	Sp1	GGGCGG	2362	6	+	Oryza sativa	light responsive element	Light responsiveness	Light responsiveness
Sh_Ss01A0029784.t1	ShAP2-4	G-Box	CACGTT	1800	6	+	Pisum sativum	cis-acting regulatory element involved in light responsiveness	Light responsiveness	Light responsiveness
Sh_Ss01A0029784.t1	ShAP2-4	G-box	TACGTG	1102	6	-	Arabidopsis thaliana	cis-acting regulatory element involved in light responsiveness	Light responsiveness	Light responsiveness
Sh_Ss01A0029784.t1	ShAP2-4	TCCC-motif	TCTCCCT	2145	7	+	Spinacia oleracea	part of a light responsive element	Light responsiveness	Light responsiveness
Sh_Ss01A0029784.t1	ShAP2-4	ABRE	CACGTG	1881	6	-	Arabidopsis thaliana	cis-acting element involved in the abscisic acid responsiveness	abscisic acid responsiveness	Hormone responsiveness
Sh_Ss01A0029784.t1	ShAP2-4	TGACG-motif	TGACG	295	5	+	Hordeum vulgare	cis-acting regulatory element involved in the MeJA-responsiveness	MeJA responsiveness	Hormone responsiveness
Sh_Ss01A0029784.t1	ShAP2-4	TGACG-motif	TGACG	964	5	-	Hordeum vulgare	cis-acting regulatory element involved in the MeJA-responsiveness	MeJA responsiveness	Hormone responsiveness
Sh_Ss01A0029784.t1	ShAP2-4	TGACG-motif	TGACG	980	5	+	Hordeum vulgare	cis-acting regulatory element involved in the MeJA-responsiveness	MeJA responsiveness	Hormone responsiveness
Sh_Ss01A0029784.t1	ShAP2-4	TCA	TCATCTTCAT	358	9	+	Pisum sativum		SA responsiveness	Hormone responsiveness
Sh_Ss01A0029784.t1	ShAP2-4	ERE	ATTTTAAA	366	8	+	Nicotiana glutinos		ETH responsiveness	Hormone responsiveness
Sh_Ss01A0029784.t1	ShAP2-4	ABRE4	CACGTA	1102	6	+	Zea mays		abscisic acid responsiveness	Hormone responsiveness
Sh_Ss01A0029784.t1	ShAP2-4	TGA-element	AACGAC	342	6	-	Brassica oleracea	auxin-responsive element	Auxin responsiveness	Hormone responsiveness
Sh_Ss01A0029784.t1	ShAP2-4	TGA-element	AACGAC	1286	6	+	Brassica oleracea	auxin-responsive element	Auxin responsiveness	Hormone responsiveness
Sh_Ss01A0029784.t1	ShAP2-4	ABRE	CGCACGTGTC	116	9	+	Hordeum vulgare	cis-acting element involved in the abscisic acid responsiveness	abscisic acid responsiveness	Hormone responsiveness
Sh_Ss01A0029784.t1	ShAP2-4	ABRE	ACGTG	118	5	-	Arabidopsis thaliana	cis-acting element involved in the abscisic acid responsiveness	abscisic acid responsiveness	Hormone responsiveness
Sh_Ss01A0029784.t1	ShAP2-4	ABRE	ACGTG	1102	5	-	Arabidopsis thaliana	cis-acting element involved in the abscisic acid responsiveness	abscisic acid responsiveness	Hormone responsiveness
Sh_Ss01A0029784.t1	ShAP2-4	ABRE	ACGTG	1800	5	-	Arabidopsis thaliana	cis-acting element involved in the abscisic acid responsiveness	abscisic acid responsiveness	Hormone responsiveness
Sh_Ss01A0029784.t1	ShAP2-4	ABRE	ACGTG	1882	5	+	Arabidopsis thaliana	cis-acting element involved in the abscisic acid responsiveness	abscisic acid responsiveness	Hormone responsiveness
Sh_Ss01A0029784.t1	ShAP2-4	CGTCA-motif	CGTCA	295	5	-	Hordeum vulgare	cis-acting regulatory element involved in the MeJA-responsiveness	MeJA responsiveness	Hormone responsiveness
Sh_Ss01A0029784.t1	ShAP2-4	CGTCA-motif	CGTCA	964	5	+	Hordeum vulgare	cis-acting regulatory element involved in the MeJA-responsiveness	MeJA responsiveness	Hormone responsiveness
Sh_Ss01A0029784.t1	ShAP2-4	CGTCA-motif	CGTCA	980	5	-	Hordeum vulgare	cis-acting regulatory element involved in the MeJA-responsiveness	MeJA responsiveness	Hormone responsiveness
Sh_Ss01A0029784.t1	ShAP2-4	AAGAA-motif	gGTAAAGAAA	651	9	-	Avena sativa		abscisic acid responsiveness	Hormone responsiveness
Sh_Ss01A0029784.t1	ShAP2-4	ABRE3a	TACGTG	1102	6	-	Zea mays		abscisic acid responsiveness	Hormone responsiveness
Sh_Ss01A0029784.t1	ShAP2-4	CCGTCC-box	CCGTCC	467	6	-	Petroselinum hortense		Meristem specific activation	Development responsiveness
Sh_Ss01A0029784.t1	ShAP2-4	CCGTCC-box	CCGTCC	474	6	-	Petroselinum hortense		Meristem specific activation	Development responsiveness
Sh_Ss01A0029784.t1	ShAP2-4	CCGTCC-box	CCGTCC	507	6	-	Petroselinum hortense		Meristem specific activation	Development responsiveness
Sh_Ss01A0029784.t1	ShAP2-4	CAT-box	GCCACT	706	6	+	Arabidopsis thaliana	cis-acting regulatory element related to meristem expression	Meristem specific activation	Development responsiveness
Sh_Ss01A0029784.t1	ShAP2-4	CAT-box	GCCACT	1628	6	+	Arabidopsis thaliana	cis-acting regulatory element related to meristem expression	Meristem specific activation	Development responsiveness
Sh_Ss01A0029784.t1	ShAP2-4	CAT-box	GCCACT	2415	6	-	Arabidopsis thaliana	cis-acting regulatory element related to meristem expression	Meristem specific activation	Development responsiveness
Sh_Ss01A0029784.t1	ShAP2-4	RY-element	CATGCATG	956	8	+	Helianthus annuus	cis-acting regulatory element involved in seed-specific regulation	seed-specific regulation	Development responsiveness
Sh_Ss01A0029784.t1	ShAP2-4	WRE3	CCACCT	2461	6	-	Pisum sativum		Wound responsiveness	Stress responsiveness
Sh_Ss01A0029784.t1	ShAP2-4	STRE	AGGGG	16	5	+	Arabidopsis thaliana		Wound responsiveness	Stress responsiveness
Sh_Ss01A0029784.t1	ShAP2-4	STRE	AGGGG	488	5	+	Arabidopsis thaliana		Wound responsiveness	Stress responsiveness
Sh_Ss01A0029784.t1	ShAP2-4	STRE	AGGGG	542	5	-	Arabidopsis thaliana		Wound responsiveness	Stress responsiveness
Sh_Ss01A0029784.t1	ShAP2-4	STRE	AGGGG	2211	5	-	Arabidopsis thaliana		Wound responsiveness	Stress responsiveness
Sh_Ss01A0029784.t1	ShAP2-4	LTR	CCGAAA	133	6	-	Hordeum vulgare	cis-acting element involved in low-temperature responsiveness	low-temperature	Stress responsiveness
Sh_Ss01A0029784.t1	ShAP2-4	LTR	CCGAAA	1225	6	+	Hordeum vulgare	cis-acting element involved in low-temperature responsiveness	low-temperature	Stress responsiveness
Sh_Ss01A0029784.t1	ShAP2-4	GC-motif	CCCCCG	559	6	+	Zea mays	enhancer-like element involved in anoxic specific inducibility	anaerobic induction	Stress responsiveness
Sh_Ss01A0029784.t1	ShAP2-4	ARE	AAACCA	1161	6	-	Zea mays	cis-acting regulatory element essential for the anaerobic induction	anaerobic induction	Stress responsiveness
Sh_Ss01A0029784.t1	ShAP2-4	ARE	AAACCA	1731	6	+	Zea mays	cis-acting regulatory element essential for the anaerobic induction	anaerobic induction	Stress responsiveness
Sh_Ss01A0029784.t1	ShAP2-4	MYB	CAACAG	679	6	+	Arabidopsis thaliana		MYB	Transcription factor
Sh_Ss01A0029784.t1	ShAP2-4	MBS	CAACTG	1337	6	+	Arabidopsis thaliana	MYB binding site involved in drought-inducibility	MYB	Transcription factor
Sh_Ss01A0029784.t1	ShAP2-4	MYB	TAACCA	1805	6	+	Arabidopsis thaliana		MYB	Transcription factor
Sh_Ss01A0029784.t1	ShAP2-4	MYB recognition site	CCGTTG	2180	6	+	Arabidopsis thaliana		MYB	Transcription factor
Sh_Ss01A0029784.t1	ShAP2-4	MYB	CAACCA	73	6	+	Arabidopsis thaliana		MYB	Transcription factor
Sh_Ss01A0029784.t1	ShAP2-4	MYB	CAACCA	210	6	+	Arabidopsis thaliana		MYB	Transcription factor
Sh_Ss01A0029784.t1	ShAP2-4	MYB	CAACCA	2030	6	-	Arabidopsis thaliana		MYB	Transcription factor
Sh_Ss01A0029784.t1	ShAP2-4	Myb	TAACTG	11	6	-	Arabidopsis thaliana		MYB	Transcription factor
Sh_Ss01A0029784.t1	ShAP2-4	Myb	TAACTG	2095	6	+	Arabidopsis thaliana		MYB	Transcription factor
Sh_Ss01A0029784.t1	ShAP2-4	DRE core	GCCGAC	1094	6	-	Arabidopsis thaliana		DRE	Transcription factor
Sh_Ss01A0029784.t1	ShAP2-4	MYC	CATTTG	912	6	-	Arabidopsis thaliana		MYC	Transcription factor
Sh_Ss01A0029784.t1	ShAP2-4	MYC	CATTTG	1242	6	+	Arabidopsis thaliana		MYC	Transcription factor
Sh_Ss01A0029784.t1	ShAP2-4	MYC	CATGTG	1272	6	+	Arabidopsis thaliana		MYC	Transcription factor
Sh_Ss01A0029784.t1	ShAP2-4	MYC	CATTTG	1420	6	+	Arabidopsis thaliana		MYC	Transcription factor
Sh_Ss01A0029784.t1	ShAP2-4	MYC	CATGTG	1523	6	+	Arabidopsis thaliana		MYC	Transcription factor
Sh_Ss01A0029784.t1	ShAP2-4	CCAAT-box	CAACGG	2180	6	-	Hordeum vulgare	MYBHv1 binding site	MYB	Transcription factor
Sh_Ss10E0011531.t1	ShAP2-41	G-box	TACGTG	1196	6	-	Arabidopsis thaliana	cis-acting regulatory element involved in light responsiveness	Light responsiveness	Light responsiveness
Sh_Ss10E0011531.t1	ShAP2-41	G-box	TACGTG	1439	6	-	Arabidopsis thaliana	cis-acting regulatory element involved in light responsiveness	Light responsiveness	Light responsiveness
Sh_Ss10E0011531.t1	ShAP2-41	G-box	TACGTG	1473	6	-	Arabidopsis thaliana	cis-acting regulatory element involved in light responsiveness	Light responsiveness	Light responsiveness
Sh_Ss10E0011531.t1	ShAP2-41	Sp1	GGGCGG	33	6	+	Oryza sativa	light responsive element	Light responsiveness	Light responsiveness
Sh_Ss10E0011531.t1	ShAP2-41	AE-box	AGAAACAA	1319	8	+	Arabidopsis thaliana	part of a module for light response	Light responsiveness	Light responsiveness
Sh_Ss10E0011531.t1	ShAP2-41	I-box	TGATAATGT	917	9	+	Solanum tuberosum	part of a light responsive element	Light responsiveness	Light responsiveness
Sh_Ss10E0011531.t1	ShAP2-41	I-box	GTATAAGGCC	1140	10	-	Larix laricina	part of a light responsive element	Light responsiveness	Light responsiveness
Sh_Ss10E0011531.t1	ShAP2-41	Box 4	ATTAAT	351	6	+	Petroselinum crispum	part of a conserved DNA module involved in light responsiveness	Light responsiveness	Light responsiveness
Sh_Ss10E0011531.t1	ShAP2-41	Box 4	ATTAAT	1352	6	-	Petroselinum crispum	part of a conserved DNA module involved in light responsiveness	Light responsiveness	Light responsiveness
Sh_Ss10E0011531.t1	ShAP2-41	Box 4	ATTAAT	2006	6	-	Petroselinum crispum	part of a conserved DNA module involved in light responsiveness	Light responsiveness	Light responsiveness
Sh_Ss10E0011531.t1	ShAP2-41	Box 4	ATTAAT	2263	6	-	Petroselinum crispum	part of a conserved DNA module involved in light responsiveness	Light responsiveness	Light responsiveness
Sh_Ss10E0011531.t1	ShAP2-41	G-box	TAACACGTAG	240	9	+	Brassica oleracea	cis-acting regulatory element involved in light responsiveness	Light responsiveness	Light responsiveness
Sh_Ss10E0011531.t1	ShAP2-41	G-box	CACGTC	871	6	+	Zea mays	cis-acting regulatory element involved in light responsiveness	Light responsiveness	Light responsiveness
Sh_Ss10E0011531.t1	ShAP2-41	ABRE3a	TACGTG	1196	6	-	Zea mays		abscisic acid responsiveness	Hormone responsiveness
Sh_Ss10E0011531.t1	ShAP2-41	ABRE3a	TACGTG	1439	6	-	Zea mays		abscisic acid responsiveness	Hormone responsiveness
Sh_Ss10E0011531.t1	ShAP2-41	ABRE3a	TACGTG	1473	6	-	Zea mays		abscisic acid responsiveness	Hormone responsiveness
Sh_Ss10E0011531.t1	ShAP2-41	CGTCA-motif	CGTCA	873	5	+	Hordeum vulgare	cis-acting regulatory element involved in the MeJA-responsiveness	MeJA responsiveness	Hormone responsiveness
Sh_Ss10E0011531.t1	ShAP2-41	TCA	TCATCTTCAT	832	9	+	Pisum sativum		SA responsiveness	Hormone responsiveness
Sh_Ss10E0011531.t1	ShAP2-41	AAGAA-motif	gGTAAAGAAA	1744	9	-	Avena sativa		abscisic acid responsiveness	Hormone responsiveness
Sh_Ss10E0011531.t1	ShAP2-41	AAGAA-motif	gGTAAAGAAA	2362	9	+	Avena sativa		abscisic acid responsiveness	Hormone responsiveness
Sh_Ss10E0011531.t1	ShAP2-41	TGACG-motif	TGACG	873	5	-	Hordeum vulgare	cis-acting regulatory element involved in the MeJA-responsiveness	MeJA responsiveness	Hormone responsiveness
Sh_Ss10E0011531.t1	ShAP2-41	ABRE4	CACGTA	1196	6	+	Zea mays		abscisic acid responsiveness	Hormone responsiveness
Sh_Ss10E0011531.t1	ShAP2-41	ABRE4	CACGTA	1439	6	+	Zea mays		abscisic acid responsiveness	Hormone responsiveness
Sh_Ss10E0011531.t1	ShAP2-41	ABRE4	CACGTA	1473	6	+	Zea mays		abscisic acid responsiveness	Hormone responsiveness
Sh_Ss10E0011531.t1	ShAP2-41	TGA-element	AACGAC	1302	6	-	Brassica oleracea	auxin-responsive element	Auxin responsiveness	Hormone responsiveness
Sh_Ss10E0011531.t1	ShAP2-41	TCA-element	CCATCTTTTT	2312	10	-	Nicotiana tabacum	cis-acting element involved in salicylic acid responsiveness	SA responsiveness	Hormone responsiveness
Sh_Ss10E0011531.t1	ShAP2-41	ABRE	TACGTGTC	1471	8	-	Oryza sativa	cis-acting element involved in the abscisic acid responsiveness	abscisic acid responsiveness	Hormone responsiveness
Sh_Ss10E0011531.t1	ShAP2-41	ABRE	ACGTG	871	5	-	Arabidopsis thaliana	cis-acting element involved in the abscisic acid responsiveness	abscisic acid responsiveness	Hormone responsiveness
Sh_Ss10E0011531.t1	ShAP2-41	ABRE	GACACGTGGC	947	9	-	Triticum aestivum	cis-acting element involved in the abscisic acid responsiveness	abscisic acid responsiveness	Hormone responsiveness
Sh_Ss10E0011531.t1	ShAP2-41	ABRE	ACGTG	1196	5	-	Arabidopsis thaliana	cis-acting element involved in the abscisic acid responsiveness	abscisic acid responsiveness	Hormone responsiveness
Sh_Ss10E0011531.t1	ShAP2-41	ABRE	ACGTG	1439	5	-	Arabidopsis thaliana	cis-acting element involved in the abscisic acid responsiveness	abscisic acid responsiveness	Hormone responsiveness
Sh_Ss10E0011531.t1	ShAP2-41	ABRE	ACGTG	1473	5	-	Arabidopsis thaliana	cis-acting element involved in the abscisic acid responsiveness	abscisic acid responsiveness	Hormone responsiveness
Sh_Ss10E0011531.t1	ShAP2-41	CAT-box	GCCACT	45	6	-	Arabidopsis thaliana	cis-acting regulatory element related to meristem expression	Meristem specific activation	Development responsiveness
Sh_Ss10E0011531.t1	ShAP2-41	CCGTCC-box	CCGTCC	289	6	+	Petroselinum hortense		Meristem specific activation	Development responsiveness
Sh_Ss10E0011531.t1	ShAP2-41	CCGTCC-box	CCGTCC	1258	6	-	Petroselinum hortense		Meristem specific activation	Development responsiveness
Sh_Ss10E0011531.t1	ShAP2-41	GCN4_motif	TGAGTCA	794	7	-	Oryza sativa	cis-regulatory element involved in endosperm expression	endosperm	Development responsiveness
Sh_Ss10E0011531.t1	ShAP2-41	O2-site	GATGATGTGG	1899	10	-	Zea mays	cis-acting regulatory element involved in zein metabolism regulation	zein metabolism regulation	Development responsiveness
Sh_Ss10E0011531.t1	ShAP2-41	LTR	CCGAAA	294	6	+	Hordeum vulgare	cis-acting element involved in low-temperature responsiveness	low-temperature	Stress responsiveness
Sh_Ss10E0011531.t1	ShAP2-41	WRE3	CCACCT	64	6	-	Pisum sativum		Wound responsiveness	Stress responsiveness
Sh_Ss10E0011531.t1	ShAP2-41	WRE3	CCACCT	74	6	-	Pisum sativum		Wound responsiveness	Stress responsiveness
Sh_Ss10E0011531.t1	ShAP2-41	STRE	AGGGG	1637	5	+	Arabidopsis thaliana		Wound responsiveness	Stress responsiveness
Sh_Ss10E0011531.t1	ShAP2-41	ARE	AAACCA	735	6	+	Zea mays	cis-acting regulatory element essential for the anaerobic induction	anaerobic induction	Stress responsiveness
Sh_Ss10E0011531.t1	ShAP2-41	ARE	AAACCA	818	6	+	Zea mays	cis-acting regulatory element essential for the anaerobic induction	anaerobic induction	Stress responsiveness
Sh_Ss10E0011531.t1	ShAP2-41	ARE	AAACCA	882	6	+	Zea mays	cis-acting regulatory element essential for the anaerobic induction	anaerobic induction	Stress responsiveness
Sh_Ss10E0011531.t1	ShAP2-41	ARE	AAACCA	1579	6	-	Zea mays	cis-acting regulatory element essential for the anaerobic induction	anaerobic induction	Stress responsiveness
Sh_Ss10E0011531.t1	ShAP2-41	MYC	CATTTG	1430	6	-	Arabidopsis thaliana		MYC	Transcription factor
Sh_Ss10E0011531.t1	ShAP2-41	MYB	TAACCA	813	6	+	Arabidopsis thaliana		MYB	Transcription factor
Sh_Ss10E0011531.t1	ShAP2-41	Myb	TAACTG	1215	6	-	Arabidopsis thaliana		MYB	Transcription factor
Sh_Ss10E0011531.t1	ShAP2-41	Myb	TAACTG	1247	6	-	Arabidopsis thaliana		MYB	Transcription factor
Sh_Ss10E0011531.t1	ShAP2-41	Myb	TAACTG	1754	6	-	Arabidopsis thaliana		MYB	Transcription factor
Sh_Ss10E0011531.t1	ShAP2-41	CCAAT-box	CAACGG	913	6	-	Hordeum vulgare	MYBHv1 binding site	MYB	Transcription factor
Sh_Ss10E0011531.t1	ShAP2-41	MYB recognition site	CCGTTG	913	6	+	Arabidopsis thaliana		MYB	Transcription factor
Sh_Ss10E0011531.t1	ShAP2-41	MYC	CATGTG	965	6	+	Arabidopsis thaliana		MYC	Transcription factor
Sh_Ss10E0011531.t1	ShAP2-41	MYC	CATTTG	1187	6	-	Arabidopsis thaliana		MYC	Transcription factor
Sh_Ss10E0011531.t1	ShAP2-41	MYC	CATTTG	2185	6	+	Arabidopsis thaliana		MYC	Transcription factor
Sh_So06K0265859.t1	ShAP2-44	GATA-motif	AAGGATAAGG	1879	9	+	Solanum tuberosum	part of a light responsive element	Light responsiveness	Light responsiveness
Sh_So06K0265859.t1	ShAP2-44	Gap-box	CAAATGAA(A/G)A	1463	9	-	Arabidopsis thaliana	part of a light responsive element	Light responsiveness	Light responsiveness
Sh_So06K0265859.t1	ShAP2-44	G-box	CACGTC	317	6	-	Zea mays	cis-acting regulatory element involved in light responsiveness	Light responsiveness	Light responsiveness
Sh_So06K0265859.t1	ShAP2-44	G-box	CACGTC	793	6	+	Zea mays	cis-acting regulatory element involved in light responsiveness	Light responsiveness	Light responsiveness
Sh_So06K0265859.t1	ShAP2-44	G-box	CACGTC	840	6	-	Zea mays	cis-acting regulatory element involved in light responsiveness	Light responsiveness	Light responsiveness
Sh_So06K0265859.t1	ShAP2-44	G-box	CACGTC	1223	6	-	Zea mays	cis-acting regulatory element involved in light responsiveness	Light responsiveness	Light responsiveness
Sh_So06K0265859.t1	ShAP2-44	G-Box	CACGTT	907	6	+	Pisum sativum	cis-acting regulatory element involved in light responsiveness	Light responsiveness	Light responsiveness
Sh_So06K0265859.t1	ShAP2-44	G-Box	CACGTT	1618	6	-	Pisum sativum	cis-acting regulatory element involved in light responsiveness	Light responsiveness	Light responsiveness
Sh_So06K0265859.t1	ShAP2-44	chs-CMA2b	GAACCTACACAC	468	11	+	Hordeum vulgare	part of a light responsive element	Light responsiveness	Light responsiveness
Sh_So06K0265859.t1	ShAP2-44	Sp1	GGGCGG	1989	6	-	Oryza sativa	light responsive element	Light responsiveness	Light responsiveness
Sh_So06K0265859.t1	ShAP2-44	G-box	TACGTG	1646	6	+	Arabidopsis thaliana	cis-acting regulatory element involved in light responsiveness	Light responsiveness	Light responsiveness
Sh_So06K0265859.t1	ShAP2-44	TGACG-motif	TGACG	795	5	-	Hordeum vulgare	cis-acting regulatory element involved in the MeJA-responsiveness	MeJA responsiveness	Hormone responsiveness
Sh_So06K0265859.t1	ShAP2-44	TGACG-motif	TGACG	1222	5	+	Hordeum vulgare	cis-acting regulatory element involved in the MeJA-responsiveness	MeJA responsiveness	Hormone responsiveness
Sh_So06K0265859.t1	ShAP2-44	TGACG-motif	TGACG	1952	5	+	Hordeum vulgare	cis-acting regulatory element involved in the MeJA-responsiveness	MeJA responsiveness	Hormone responsiveness
Sh_So06K0265859.t1	ShAP2-44	ERE	ATTTTAAA	802	8	+	Nicotiana glutinos		ETH responsiveness	Hormone responsiveness
Sh_So06K0265859.t1	ShAP2-44	ABRE	ACGTG	318	5	+	Arabidopsis thaliana	cis-acting element involved in the abscisic acid responsiveness	abscisic acid responsiveness	Hormone responsiveness
Sh_So06K0265859.t1	ShAP2-44	ABRE	ACGTG	793	5	-	Arabidopsis thaliana	cis-acting element involved in the abscisic acid responsiveness	abscisic acid responsiveness	Hormone responsiveness
Sh_So06K0265859.t1	ShAP2-44	ABRE	ACGTG	841	5	+	Arabidopsis thaliana	cis-acting element involved in the abscisic acid responsiveness	abscisic acid responsiveness	Hormone responsiveness
Sh_So06K0265859.t1	ShAP2-44	ABRE	ACGTG	907	5	-	Arabidopsis thaliana	cis-acting element involved in the abscisic acid responsiveness	abscisic acid responsiveness	Hormone responsiveness
Sh_So06K0265859.t1	ShAP2-44	ABRE	ACGTG	1224	5	+	Arabidopsis thaliana	cis-acting element involved in the abscisic acid responsiveness	abscisic acid responsiveness	Hormone responsiveness
Sh_So06K0265859.t1	ShAP2-44	ABRE	ACGTG	1619	5	+	Arabidopsis thaliana	cis-acting element involved in the abscisic acid responsiveness	abscisic acid responsiveness	Hormone responsiveness
Sh_So06K0265859.t1	ShAP2-44	ABRE	ACGTG	1647	5	+	Arabidopsis thaliana	cis-acting element involved in the abscisic acid responsiveness	abscisic acid responsiveness	Hormone responsiveness
Sh_So06K0265859.t1	ShAP2-44	ABRE	TACGGTC	1910	7	+	Arabidopsis thaliana	cis-acting element involved in the abscisic acid responsiveness	abscisic acid responsiveness	Hormone responsiveness
Sh_So06K0265859.t1	ShAP2-44	P-box	CCTTTTG	1876	7	-	Oryza sativa	gibberellin-responsive element	GA responsiveness	Hormone responsiveness
Sh_So06K0265859.t1	ShAP2-44	P-box	CCTTTTG	2099	7	+	Oryza sativa	gibberellin-responsive element	GA responsiveness	Hormone responsiveness
Sh_So06K0265859.t1	ShAP2-44	TGA-element	AACGAC	1961	6	+	Brassica oleracea	auxin-responsive element	Auxin responsiveness	Hormone responsiveness
Sh_So06K0265859.t1	ShAP2-44	ABRE4	CACGTA	1646	6	-	Zea mays		abscisic acid responsiveness	Hormone responsiveness
Sh_So06K0265859.t1	ShAP2-44	AAGAA-motif	GAAAGAA	932	7	-	Avena sativa		abscisic acid responsiveness	Hormone responsiveness
Sh_So06K0265859.t1	ShAP2-44	AAGAA-motif	gGTAAAGAAA	1095	9	-	Avena sativa		abscisic acid responsiveness	Hormone responsiveness
Sh_So06K0265859.t1	ShAP2-44	AAGAA-motif	GAAAGAA	1625	7	-	Avena sativa		abscisic acid responsiveness	Hormone responsiveness
Sh_So06K0265859.t1	ShAP2-44	CGTCA-motif	CGTCA	795	5	+	Hordeum vulgare	cis-acting regulatory element involved in the MeJA-responsiveness	MeJA responsiveness	Hormone responsiveness
Sh_So06K0265859.t1	ShAP2-44	CGTCA-motif	CGTCA	1222	5	-	Hordeum vulgare	cis-acting regulatory element involved in the MeJA-responsiveness	MeJA responsiveness	Hormone responsiveness
Sh_So06K0265859.t1	ShAP2-44	CGTCA-motif	CGTCA	1952	5	-	Hordeum vulgare	cis-acting regulatory element involved in the MeJA-responsiveness	MeJA responsiveness	Hormone responsiveness
Sh_So06K0265859.t1	ShAP2-44	ABRE3a	TACGTG	1646	6	+	Zea mays		abscisic acid responsiveness	Hormone responsiveness
Sh_So06K0265859.t1	ShAP2-44	O2-site	GTTGACGTGA	792	9	-	Zea mays	cis-acting regulatory element involved in zein metabolism regulation	zein metabolism regulation	Development responsiveness
Sh_So06K0265859.t1	ShAP2-44	CCGTCC-box	CCGTCC	1842	6	+	Petroselinum hortense		Meristem specific activation	Development responsiveness
Sh_So06K0265859.t1	ShAP2-44	WRE3	CCACCT	2324	6	+	Pisum sativum		Wound responsiveness	Stress responsiveness
Sh_So06K0265859.t1	ShAP2-44	STRE	AGGGG	216	5	-	Arabidopsis thaliana		Wound responsiveness	Stress responsiveness
Sh_So06K0265859.t1	ShAP2-44	STRE	AGGGG	230	5	-	Arabidopsis thaliana		Wound responsiveness	Stress responsiveness
Sh_So06K0265859.t1	ShAP2-44	STRE	AGGGG	1111	5	-	Arabidopsis thaliana		Wound responsiveness	Stress responsiveness
Sh_So06K0265859.t1	ShAP2-44	STRE	AGGGG	1846	5	-	Arabidopsis thaliana		Wound responsiveness	Stress responsiveness
Sh_So06K0265859.t1	ShAP2-44	STRE	AGGGG	1906	5	-	Arabidopsis thaliana		Wound responsiveness	Stress responsiveness
Sh_So06K0265859.t1	ShAP2-44	STRE	AGGGG	2037	5	+	Arabidopsis thaliana		Wound responsiveness	Stress responsiveness
Sh_So06K0265859.t1	ShAP2-44	STRE	AGGGG	2251	5	+	Arabidopsis thaliana		Wound responsiveness	Stress responsiveness
Sh_So06K0265859.t1	ShAP2-44	STRE	AGGGG	2330	5	-	Arabidopsis thaliana		Wound responsiveness	Stress responsiveness
Sh_So06K0265859.t1	ShAP2-44	STRE	AGGGG	2396	5	-	Arabidopsis thaliana		Wound responsiveness	Stress responsiveness
Sh_So06K0265859.t1	ShAP2-44	GC-motif	CCCCCG	1890	6	-	Zea mays	enhancer-like element involved in anoxic specific inducibility	anaerobic induction	Stress responsiveness
Sh_So06K0265859.t1	ShAP2-44	ARE	AAACCA	348	6	-	Zea mays	cis-acting regulatory element essential for the anaerobic induction	anaerobic induction	Stress responsiveness
Sh_So06K0265859.t1	ShAP2-44	ARE	AAACCA	408	6	+	Zea mays	cis-acting regulatory element essential for the anaerobic induction	anaerobic induction	Stress responsiveness
Sh_So06K0265859.t1	ShAP2-44	ARE	AAACCA	952	6	+	Zea mays	cis-acting regulatory element essential for the anaerobic induction	anaerobic induction	Stress responsiveness
Sh_So06K0265859.t1	ShAP2-44	ARE	AAACCA	1518	6	+	Zea mays	cis-acting regulatory element essential for the anaerobic induction	anaerobic induction	Stress responsiveness
Sh_So06K0265859.t1	ShAP2-44	MYB	CAACAG	193	6	+	Arabidopsis thaliana		MYB	Transcription factor
Sh_So06K0265859.t1	ShAP2-44	MYB	CAACAG	2293	6	+	Arabidopsis thaliana		MYB	Transcription factor
Sh_So06K0265859.t1	ShAP2-44	MYB recognition site	CCGTTG	1916	6	-	Arabidopsis thaliana		MYB	Transcription factor
Sh_So06K0265859.t1	ShAP2-44	MRE	AACCTAA	469	7	+	Petroselinum crispum	MYB binding site involved in light responsiveness	MYB	Transcription factor
Sh_So06K0265859.t1	ShAP2-44	Myb	TAACTG	196	6	-	Arabidopsis thaliana		MYB	Transcription factor
Sh_So06K0265859.t1	ShAP2-44	MYC	CATTTG	446	6	+	Arabidopsis thaliana		MYC	Transcription factor
Sh_So06K0265859.t1	ShAP2-44	MYC	CATTTG	625	6	-	Arabidopsis thaliana		MYC	Transcription factor
Sh_So06K0265859.t1	ShAP2-44	MYC	CATTTG	1467	6	+	Arabidopsis thaliana		MYC	Transcription factor
Sh_So06K0265859.t1	ShAP2-44	DRE core	GCCGAC	2073	6	+	Arabidopsis thaliana		DRE	Transcription factor
Sh_So06K0265859.t1	ShAP2-44	CCAAT-box	CAACGG	1916	6	+	Hordeum vulgare	MYBHv1 binding site	MYB	Transcription factor
Sh_So06K0265859.t1	ShAP2-44	W box	TTGACC	48	6	+	Arabidopsis thaliana		WRKY	Transcription factor
Sh_So06K0265859.t1	ShAP2-44	W box	TTGACC	1913	6	-	Arabidopsis thaliana		WRKY	Transcription factor
Sh_So06K0265859.t1	ShAP2-44	MYB	TAACCA	528	6	+	Arabidopsis thaliana		MYB	Transcription factor
Sh_So07H0284224.t1	ShAP2-47	ATCT-motif	AATCTAATCC	755	9	-	Pisum sativum	part of a conserved DNA module involved in light responsiveness	Light responsiveness	Light responsiveness
Sh_So07H0284224.t1	ShAP2-47	Box 4	ATTAAT	532	6	+	Petroselinum crispum	part of a conserved DNA module involved in light responsiveness	Light responsiveness	Light responsiveness
Sh_So07H0284224.t1	ShAP2-47	GT1-motif	GGTTAA	139	6	-	Arabidopsis thaliana	light responsive element	Light responsiveness	Light responsiveness
Sh_So07H0284224.t1	ShAP2-47	GATA-motif	GATAGGA	2195	7	+	Arabidopsis thaliana	part of a light responsive element	Light responsiveness	Light responsiveness
Sh_So07H0284224.t1	ShAP2-47	TCT-motif	TCTTAC	2266	6	+	Arabidopsis thaliana	part of a light responsive element	Light responsiveness	Light responsiveness
Sh_So07H0284224.t1	ShAP2-47	G-box	TAAACGTG	969	8	-	Brassica oleracea	cis-acting regulatory element involved in light responsiveness	Light responsiveness	Light responsiveness
Sh_So07H0284224.t1	ShAP2-47	G-box	CACGTG	2334	6	-	Arabidopsis thaliana	cis-acting regulatory element involved in light responsiveness	Light responsiveness	Light responsiveness
Sh_So07H0284224.t1	ShAP2-47	G-box	CACGTC	2321	6	+	Zea mays	cis-acting regulatory element involved in light responsiveness	Light responsiveness	Light responsiveness
Sh_So07H0284224.t1	ShAP2-47	I-box	gGATAAGGTG	135	9	-	Zea mays	part of a light responsive element	Light responsiveness	Light responsiveness
Sh_So07H0284224.t1	ShAP2-47	I-box	cCATATCCAAT	1514	10	+	Flaveria trinervia	part of a light responsive element	Light responsiveness	Light responsiveness
Sh_So07H0284224.t1	ShAP2-47	G-Box	CACGTT	969	6	+	Pisum sativum	cis-acting regulatory element involved in light responsiveness	Light responsiveness	Light responsiveness
Sh_So07H0284224.t1	ShAP2-47	GA-motif	ATAGATAA	369	8	+	Arabidopsis thaliana	part of a light responsive element	Light responsiveness	Light responsiveness
Sh_So07H0284224.t1	ShAP2-47	G-box	TACGTG	1341	6	-	Arabidopsis thaliana	cis-acting regulatory element involved in light responsiveness	Light responsiveness	Light responsiveness
Sh_So07H0284224.t1	ShAP2-47	TGACG-motif	TGACG	2338	5	+	Hordeum vulgare	cis-acting regulatory element involved in the MeJA-responsiveness	MeJA responsiveness	Hormone responsiveness
Sh_So07H0284224.t1	ShAP2-47	TGACG-motif	TGACG	2450	5	+	Hordeum vulgare	cis-acting regulatory element involved in the MeJA-responsiveness	MeJA responsiveness	Hormone responsiveness
Sh_So07H0284224.t1	ShAP2-47	TATC-box	TATCCCA	1436	7	+	Oryza sativa	cis-acting element involved in gibberellin-responsiveness	GA responsiveness	Hormone responsiveness
Sh_So07H0284224.t1	ShAP2-47	TCA	TCATCTTCAT	177	9	+	Pisum sativum		SA responsiveness	Hormone responsiveness
Sh_So07H0284224.t1	ShAP2-47	ERE	ATTTTAAA	1166	8	+	Nicotiana glutinos		ETH responsiveness	Hormone responsiveness
Sh_So07H0284224.t1	ShAP2-47	ERE	ATTTTAAA	1168	8	-	Nicotiana glutinos		ETH responsiveness	Hormone responsiveness
Sh_So07H0284224.t1	ShAP2-47	ABRE	AACCCGG	768	7	-	Arabidopsis thaliana	cis-acting element involved in the abscisic acid responsiveness	abscisic acid responsiveness	Hormone responsiveness
Sh_So07H0284224.t1	ShAP2-47	ABRE	ACGTG	969	5	-	Arabidopsis thaliana	cis-acting element involved in the abscisic acid responsiveness	abscisic acid responsiveness	Hormone responsiveness
Sh_So07H0284224.t1	ShAP2-47	ABRE	ACGTG	1341	5	-	Arabidopsis thaliana	cis-acting element involved in the abscisic acid responsiveness	abscisic acid responsiveness	Hormone responsiveness
Sh_So07H0284224.t1	ShAP2-47	ABRE	ACGTG	2321	5	-	Arabidopsis thaliana	cis-acting element involved in the abscisic acid responsiveness	abscisic acid responsiveness	Hormone responsiveness
Sh_So07H0284224.t1	ShAP2-47	ABRE	GACACGTGGC	2332	9	+	Triticum aestivum	cis-acting element involved in the abscisic acid responsiveness	abscisic acid responsiveness	Hormone responsiveness
Sh_So07H0284224.t1	ShAP2-47	ABRE	ACGTG	2335	5	+	Arabidopsis thaliana	cis-acting element involved in the abscisic acid responsiveness	abscisic acid responsiveness	Hormone responsiveness
Sh_So07H0284224.t1	ShAP2-47	ABRE	CACGTG	2334	6	-	Arabidopsis thaliana	cis-acting element involved in the abscisic acid responsiveness	abscisic acid responsiveness	Hormone responsiveness
Sh_So07H0284224.t1	ShAP2-47	ABRE4	CACGTA	1341	6	+	Zea mays		abscisic acid responsiveness	Hormone responsiveness
Sh_So07H0284224.t1	ShAP2-47	AAGAA-motif	gGTAAAGAAA	504	9	+	Avena sativa		abscisic acid responsiveness	Hormone responsiveness
Sh_So07H0284224.t1	ShAP2-47	AAGAA-motif	GAAAGAA	895	7	+	Avena sativa		abscisic acid responsiveness	Hormone responsiveness
Sh_So07H0284224.t1	ShAP2-47	CGTCA-motif	CGTCA	2338	5	-	Hordeum vulgare	cis-acting regulatory element involved in the MeJA-responsiveness	MeJA responsiveness	Hormone responsiveness
Sh_So07H0284224.t1	ShAP2-47	CGTCA-motif	CGTCA	2450	5	-	Hordeum vulgare	cis-acting regulatory element involved in the MeJA-responsiveness	MeJA responsiveness	Hormone responsiveness
Sh_So07H0284224.t1	ShAP2-47	ABRE3a	TACGTG	1341	6	-	Zea mays		abscisic acid responsiveness	Hormone responsiveness
Sh_So07H0284224.t1	ShAP2-47	RY-element	CATGCATG	1791	8	-	Helianthus annuus	cis-acting regulatory element involved in seed-specific regulation	seed-specific regulation	Development responsiveness
Sh_So07H0284224.t1	ShAP2-47	WRE3	CCACCT	134	6	+	Pisum sativum		Wound responsiveness	Stress responsiveness
Sh_So07H0284224.t1	ShAP2-47	WRE3	CCACCT	1102	6	+	Pisum sativum		Wound responsiveness	Stress responsiveness
Sh_So07H0284224.t1	ShAP2-47	WRE3	CCACCT	1535	6	+	Pisum sativum		Wound responsiveness	Stress responsiveness
Sh_So07H0284224.t1	ShAP2-47	WRE3	CCACCT	2384	6	+	Pisum sativum		Wound responsiveness	Stress responsiveness
Sh_So07H0284224.t1	ShAP2-47	WRE3	CCACCT	2390	6	+	Pisum sativum		Wound responsiveness	Stress responsiveness
Sh_So07H0284224.t1	ShAP2-47	WRE3	CCACCT	2406	6	+	Pisum sativum		Wound responsiveness	Stress responsiveness
Sh_So07H0284224.t1	ShAP2-47	WUN-motif	AAATTACT	646	8	-	Nicotiana glutinosa		Wound responsiveness	Stress responsiveness
Sh_So07H0284224.t1	ShAP2-47	WUN-motif	AAATTACT	1060	8	+	Nicotiana glutinosa		Wound responsiveness	Stress responsiveness
Sh_So07H0284224.t1	ShAP2-47	STRE	AGGGG	143	5	-	Arabidopsis thaliana		Wound responsiveness	Stress responsiveness
Sh_So07H0284224.t1	ShAP2-47	STRE	AGGGG	1626	5	+	Arabidopsis thaliana		Wound responsiveness	Stress responsiveness
Sh_So07H0284224.t1	ShAP2-47	LTR	CCGAAA	810	6	+	Hordeum vulgare	cis-acting element involved in low-temperature responsiveness	low-temperature	Stress responsiveness
Sh_So07H0284224.t1	ShAP2-47	LTR	CCGAAA	1314	6	+	Hordeum vulgare	cis-acting element involved in low-temperature responsiveness	low-temperature	Stress responsiveness
Sh_So07H0284224.t1	ShAP2-47	GC-motif	CCCCCG	203	6	+	Zea mays	enhancer-like element involved in anoxic specific inducibility	anaerobic induction	Stress responsiveness
Sh_So07H0284224.t1	ShAP2-47	ARE	AAACCA	777	6	-	Zea mays	cis-acting regulatory element essential for the anaerobic induction	anaerobic induction	Stress responsiveness
Sh_So07H0284224.t1	ShAP2-47	ARE	AAACCA	1139	6	+	Zea mays	cis-acting regulatory element essential for the anaerobic induction	anaerobic induction	Stress responsiveness
Sh_So07H0284224.t1	ShAP2-47	ARE	AAACCA	2186	6	+	Zea mays	cis-acting regulatory element essential for the anaerobic induction	anaerobic induction	Stress responsiveness
Sh_So07H0284224.t1	ShAP2-47	MBS	CAACTG	1636	6	-	Arabidopsis thaliana	MYB binding site involved in drought-inducibility	MYB	Transcription factor
Sh_So07H0284224.t1	ShAP2-47	Myc	TCTCTTA	576	7	+	Arabidopsis thaliana		MYC	Transcription factor
Sh_So07H0284224.t1	ShAP2-47	MYB	CAACCA	631	6	+	Arabidopsis thaliana		MYB	Transcription factor
Sh_So07H0284224.t1	ShAP2-47	MYB recognition site	CCGTTG	1922	6	-	Arabidopsis thaliana		MYB	Transcription factor
Sh_So07H0284224.t1	ShAP2-47	MYB recognition site	CCGTTG	2007	6	-	Arabidopsis thaliana		MYB	Transcription factor
Sh_So07H0284224.t1	ShAP2-47	MYB recognition site	CCGTTG	2253	6	+	Arabidopsis thaliana		MYB	Transcription factor
Sh_So07H0284224.t1	ShAP2-47	MRE	AACCTAA	1652	7	-	Petroselinum crispum	MYB binding site involved in light responsiveness	MYB	Transcription factor
Sh_So07H0284224.t1	ShAP2-47	DRE core	GCCGAC	1619	6	+	Arabidopsis thaliana		DRE	Transcription factor
Sh_So07H0284224.t1	ShAP2-47	MYC	CATTTG	1160	6	-	Arabidopsis thaliana		MYC	Transcription factor
Sh_So07H0284224.t1	ShAP2-47	MYC	CAATTG	1222	6	+	Arabidopsis thaliana		MYC	Transcription factor
Sh_So07H0284224.t1	ShAP2-47	MYC	CATTTG	1494	6	-	Arabidopsis thaliana		MYC	Transcription factor
Sh_So07H0284224.t1	ShAP2-47	MYC	CATTTG	1526	6	+	Arabidopsis thaliana		MYC	Transcription factor
Sh_So07H0284224.t1	ShAP2-47	MYC	CATGTG	1795	6	+	Arabidopsis thaliana		MYC	Transcription factor
Sh_So07H0284224.t1	ShAP2-47	MYC	CATTTG	2178	6	+	Arabidopsis thaliana		MYC	Transcription factor
Sh_So07H0284224.t1	ShAP2-47	MYC	CATTTG	2242	6	+	Arabidopsis thaliana		MYC	Transcription factor
Sh_So07H0284224.t1	ShAP2-47	MBSI	aaaAaaC(G/C)GTTA	1991	10.5	+	Petunia hybrida	MYB binding site involved in flavonoid biosynthetic genes regulation	MYB	Transcription factor
Sh_So07H0284224.t1	ShAP2-47	CCAAT-box	CAACGG	1922	6	+	Hordeum vulgare	MYBHv1 binding site	MYB	Transcription factor
Sh_So07H0284224.t1	ShAP2-47	CCAAT-box	CAACGG	2007	6	+	Hordeum vulgare	MYBHv1 binding site	MYB	Transcription factor
Sh_So07H0284224.t1	ShAP2-47	CCAAT-box	CAACGG	2253	6	-	Hordeum vulgare	MYBHv1 binding site	MYB	Transcription factor
Sh_So07H0284224.t1	ShAP2-47	MYC	CATTTG	1430	6	+	Arabidopsis thaliana		MYC	Transcription factor
Sh_So07H0284224.t1	ShAP2-47	MYB	TAACCA	1007	6	-	Arabidopsis thaliana		MYB	Transcription factor
Sh_So01A0034954.t1	ShAP2-5	Box 4	ATTAAT	1124	6	+	Petroselinum crispum	part of a conserved DNA module involved in light responsiveness	Light responsiveness	Light responsiveness
Sh_So01A0034954.t1	ShAP2-5	Box 4	ATTAAT	1214	6	+	Petroselinum crispum	part of a conserved DNA module involved in light responsiveness	Light responsiveness	Light responsiveness
Sh_So01A0034954.t1	ShAP2-5	Box 4	ATTAAT	1248	6	+	Petroselinum crispum	part of a conserved DNA module involved in light responsiveness	Light responsiveness	Light responsiveness
Sh_So01A0034954.t1	ShAP2-5	GT1-motif	GGTTAA	1076	6	+	Arabidopsis thaliana	light responsive element	Light responsiveness	Light responsiveness
Sh_So01A0034954.t1	ShAP2-5	GT1-motif	GGTTAA	1078	6	-	Arabidopsis thaliana	light responsive element	Light responsiveness	Light responsiveness
Sh_So01A0034954.t1	ShAP2-5	GT1-motif	GGTTAA	1321	6	+	Arabidopsis thaliana	light responsive element	Light responsiveness	Light responsiveness
Sh_So01A0034954.t1	ShAP2-5	GT1-motif	GTGTGTGAA	2134	9	-	Solanum tuberosum	light responsive element	Light responsiveness	Light responsiveness
Sh_So01A0034954.t1	ShAP2-5	Sp1	GGGCGG	38	6	+	Oryza sativa	light responsive element	Light responsiveness	Light responsiveness
Sh_So01A0034954.t1	ShAP2-5	AAAC-motif	CAATCAAAACCT	695	11	+	Spinacia oleracea	light responsive element	Light responsiveness	Light responsiveness
Sh_So01A0034954.t1	ShAP2-5	G-box	CACGTG	1726	6	-	Arabidopsis thaliana	cis-acting regulatory element involved in light responsiveness	Light responsiveness	Light responsiveness
Sh_So01A0034954.t1	ShAP2-5	Sp1	GGGCGG	2479	6	+	Oryza sativa	light responsive element	Light responsiveness	Light responsiveness
Sh_So01A0034954.t1	ShAP2-5	TGACG-motif	TGACG	96	5	-	Hordeum vulgare	cis-acting regulatory element involved in the MeJA-responsiveness	MeJA responsiveness	Hormone responsiveness
Sh_So01A0034954.t1	ShAP2-5	TGACG-motif	TGACG	1328	5	-	Hordeum vulgare	cis-acting regulatory element involved in the MeJA-responsiveness	MeJA responsiveness	Hormone responsiveness
Sh_So01A0034954.t1	ShAP2-5	TGACG-motif	TGACG	1443	5	-	Hordeum vulgare	cis-acting regulatory element involved in the MeJA-responsiveness	MeJA responsiveness	Hormone responsiveness
Sh_So01A0034954.t1	ShAP2-5	TGACG-motif	TGACG	1818	5	-	Hordeum vulgare	cis-acting regulatory element involved in the MeJA-responsiveness	MeJA responsiveness	Hormone responsiveness
Sh_So01A0034954.t1	ShAP2-5	TGACG-motif	TGACG	2171	5	-	Hordeum vulgare	cis-acting regulatory element involved in the MeJA-responsiveness	MeJA responsiveness	Hormone responsiveness
Sh_So01A0034954.t1	ShAP2-5	TGACG-motif	TGACG	2265	5	-	Hordeum vulgare	cis-acting regulatory element involved in the MeJA-responsiveness	MeJA responsiveness	Hormone responsiveness
Sh_So01A0034954.t1	ShAP2-5	ABRE	ACGTG	1727	5	+	Arabidopsis thaliana	cis-acting element involved in the abscisic acid responsiveness	abscisic acid responsiveness	Hormone responsiveness
Sh_So01A0034954.t1	ShAP2-5	P-box	CCTTTTG	276	7	-	Oryza sativa	gibberellin-responsive element	GA responsiveness	Hormone responsiveness
Sh_So01A0034954.t1	ShAP2-5	P-box	CCTTTTG	605	7	-	Oryza sativa	gibberellin-responsive element	GA responsiveness	Hormone responsiveness
Sh_So01A0034954.t1	ShAP2-5	P-box	CCTTTTG	2010	7	-	Oryza sativa	gibberellin-responsive element	GA responsiveness	Hormone responsiveness
Sh_So01A0034954.t1	ShAP2-5	CGTCA-motif	CGTCA	96	5	+	Hordeum vulgare	cis-acting regulatory element involved in the MeJA-responsiveness	MeJA responsiveness	Hormone responsiveness
Sh_So01A0034954.t1	ShAP2-5	CGTCA-motif	CGTCA	1328	5	+	Hordeum vulgare	cis-acting regulatory element involved in the MeJA-responsiveness	MeJA responsiveness	Hormone responsiveness
Sh_So01A0034954.t1	ShAP2-5	CGTCA-motif	CGTCA	1443	5	+	Hordeum vulgare	cis-acting regulatory element involved in the MeJA-responsiveness	MeJA responsiveness	Hormone responsiveness
Sh_So01A0034954.t1	ShAP2-5	CGTCA-motif	CGTCA	1818	5	+	Hordeum vulgare	cis-acting regulatory element involved in the MeJA-responsiveness	MeJA responsiveness	Hormone responsiveness
Sh_So01A0034954.t1	ShAP2-5	CGTCA-motif	CGTCA	2171	5	+	Hordeum vulgare	cis-acting regulatory element involved in the MeJA-responsiveness	MeJA responsiveness	Hormone responsiveness
Sh_So01A0034954.t1	ShAP2-5	CGTCA-motif	CGTCA	2265	5	+	Hordeum vulgare	cis-acting regulatory element involved in the MeJA-responsiveness	MeJA responsiveness	Hormone responsiveness
Sh_So01A0034954.t1	ShAP2-5	AuxRR-core	GGTCCAT	2024	7	+	Nicotiana tabacum	cis-acting regulatory element involved in auxin responsiveness	Auxin responsiveness	Hormone responsiveness
Sh_So01A0034954.t1	ShAP2-5	AuxRR-core	GGTCCAT	2083	7	-	Nicotiana tabacum	cis-acting regulatory element involved in auxin responsiveness	Auxin responsiveness	Hormone responsiveness
Sh_So01A0034954.t1	ShAP2-5	ERE	ATTTCATA	187	8	-	Nicotiana glutinos		ETH responsiveness	Hormone responsiveness
Sh_So01A0034954.t1	ShAP2-5	ERE	ATTTTAAA	650	8	+	Nicotiana glutinos		ETH responsiveness	Hormone responsiveness
Sh_So01A0034954.t1	ShAP2-5	ERE	ATTTTAAA	777	8	-	Nicotiana glutinos		ETH responsiveness	Hormone responsiveness
Sh_So01A0034954.t1	ShAP2-5	ERE	ATTTCATA	1254	8	-	Nicotiana glutinos		ETH responsiveness	Hormone responsiveness
Sh_So01A0034954.t1	ShAP2-5	AAGAA-motif	gGTAAAGAAA	1487	9	+	Avena sativa		abscisic acid responsiveness	Hormone responsiveness
Sh_So01A0034954.t1	ShAP2-5	ABRE	CACGTG	1726	6	-	Arabidopsis thaliana	cis-acting element involved in the abscisic acid responsiveness	abscisic acid responsiveness	Hormone responsiveness
Sh_So01A0034954.t1	ShAP2-5	AAGAA-motif	GAAAGAA	2369	7	+	Avena sativa		abscisic acid responsiveness	Hormone responsiveness
Sh_So01A0034954.t1	ShAP2-5	TCA-element	TCAGAAGAGG	2446	9	-	Brassica oleracea	cis-acting element involved in salicylic acid responsiveness	SA responsiveness	Hormone responsiveness
Sh_So01A0034954.t1	ShAP2-5	TCA	TCATCTTCAT	2401	9	+	Pisum sativum		SA responsiveness	Hormone responsiveness
Sh_So01A0034954.t1	ShAP2-5	GCN4_motif	TGAGTCA	451	7	+	Oryza sativa	cis-regulatory element involved in endosperm expression	endosperm	Development responsiveness
Sh_So01A0034954.t1	ShAP2-5	O2-site	GATGACATGG	732	9	+	Zea mays	cis-acting regulatory element involved in zein metabolism regulation	zein metabolism regulation	Development responsiveness
Sh_So01A0034954.t1	ShAP2-5	O2-site	GATGACATGG	1111	10	+	Zea mays	cis-acting regulatory element involved in zein metabolism regulation	zein metabolism regulation	Development responsiveness
Sh_So01A0034954.t1	ShAP2-5	CAT-box	GCCACT	752	6	+	Arabidopsis thaliana	cis-acting regulatory element related to meristem expression	Meristem specific activation	Development responsiveness
Sh_So01A0034954.t1	ShAP2-5	RY-element	CATGCATG	1688	8	-	Helianthus annuus	cis-acting regulatory element involved in seed-specific regulation	seed-specific regulation	Development responsiveness
Sh_So01A0034954.t1	ShAP2-5	WRE3	CCACCT	2224	6	+	Pisum sativum		Wound responsiveness	Stress responsiveness
Sh_So01A0034954.t1	ShAP2-5	STRE	AGGGG	280	5	+	Arabidopsis thaliana		Wound responsiveness	Stress responsiveness
Sh_So01A0034954.t1	ShAP2-5	STRE	AGGGG	609	5	+	Arabidopsis thaliana		Wound responsiveness	Stress responsiveness
Sh_So01A0034954.t1	ShAP2-5	WUN-motif	AAATTACT	144	8	+	Nicotiana glutinosa		Wound responsiveness	Stress responsiveness
Sh_So01A0034954.t1	ShAP2-5	WUN-motif	AAATTACT	312	8	+	Nicotiana glutinosa		Wound responsiveness	Stress responsiveness
Sh_So01A0034954.t1	ShAP2-5	LTR	CCGAAA	640	6	-	Hordeum vulgare	cis-acting element involved in low-temperature responsiveness	low-temperature	Stress responsiveness
Sh_So01A0034954.t1	ShAP2-5	LTR	CCGAAA	1000	6	-	Hordeum vulgare	cis-acting element involved in low-temperature responsiveness	low-temperature	Stress responsiveness
Sh_So01A0034954.t1	ShAP2-5	LTR	CCGAAA	2065	6	+	Hordeum vulgare	cis-acting element involved in low-temperature responsiveness	low-temperature	Stress responsiveness
Sh_So01A0034954.t1	ShAP2-5	STRE	AGGGG	2436	5	-	Arabidopsis thaliana		Wound responsiveness	Stress responsiveness
Sh_So01A0034954.t1	ShAP2-5	ARE	AAACCA	559	6	-	Zea mays	cis-acting regulatory element essential for the anaerobic induction	anaerobic induction	Stress responsiveness
Sh_So01A0034954.t1	ShAP2-5	GC-motif	CCCCCG	2233	6	+	Zea mays	enhancer-like element involved in anoxic specific inducibility	anaerobic induction	Stress responsiveness
Sh_So01A0034954.t1	ShAP2-5	GC-motif	CCCCCG	2487	6	-	Zea mays	enhancer-like element involved in anoxic specific inducibility	anaerobic induction	Stress responsiveness
Sh_So01A0034954.t1	ShAP2-5	MYC	CATTTG	720	6	+	Arabidopsis thaliana		MYC	Transcription factor
Sh_So01A0034954.t1	ShAP2-5	MYC	CATTTG	747	6	-	Arabidopsis thaliana		MYC	Transcription factor
Sh_So01A0034954.t1	ShAP2-5	MYC	CATTTG	972	6	+	Arabidopsis thaliana		MYC	Transcription factor
Sh_So01A0034954.t1	ShAP2-5	MYC	CATGTG	1155	6	-	Arabidopsis thaliana		MYC	Transcription factor
Sh_So01A0034954.t1	ShAP2-5	MYB	CAACCA	739	6	-	Arabidopsis thaliana		MYB	Transcription factor
Sh_So01A0034954.t1	ShAP2-5	MYB	CAACCA	760	6	-	Arabidopsis thaliana		MYB	Transcription factor
Sh_So01A0034954.t1	ShAP2-5	MRE	AACCTAA	1080	7	+	Petroselinum crispum	MYB binding site involved in light responsiveness	MYB	Transcription factor
Sh_So01A0034954.t1	ShAP2-5	W box	TTGACC	763	6	+	Arabidopsis thaliana		WRKY	Transcription factor
Sh_So01A0034954.t1	ShAP2-5	MYB	TAACCA	1320	6	-	Arabidopsis thaliana		MYB	Transcription factor
Sh_So07H0284924.t1	ShAP2-52	I-box	cGATAAGGCG	1175	9	-	Zea mays	part of a light responsive element	Light responsiveness	Light responsiveness
Sh_So07H0284924.t1	ShAP2-52	LAMP-element	CTTTATCA	885	8	+	Pisum sativum	part of a light responsive element	Light responsiveness	Light responsiveness
Sh_So07H0284924.t1	ShAP2-52	GT1-motif	GGTTAAT	1635	7	+	Avena sativa	light responsive element	Light responsiveness	Light responsiveness
Sh_So07H0284924.t1	ShAP2-52	Box 4	ATTAAT	297	6	+	Petroselinum crispum	part of a conserved DNA module involved in light responsiveness	Light responsiveness	Light responsiveness
Sh_So07H0284924.t1	ShAP2-52	Box 4	ATTAAT	345	6	+	Petroselinum crispum	part of a conserved DNA module involved in light responsiveness	Light responsiveness	Light responsiveness
Sh_So07H0284924.t1	ShAP2-52	Box 4	ATTAAT	395	6	+	Petroselinum crispum	part of a conserved DNA module involved in light responsiveness	Light responsiveness	Light responsiveness
Sh_So07H0284924.t1	ShAP2-52	Box 4	ATTAAT	410	6	+	Petroselinum crispum	part of a conserved DNA module involved in light responsiveness	Light responsiveness	Light responsiveness
Sh_So07H0284924.t1	ShAP2-52	Sp1	GGGCGG	1115	6	+	Oryza sativa	light responsive element	Light responsiveness	Light responsiveness
Sh_So07H0284924.t1	ShAP2-52	TCT-motif	TCTTAC	553	6	-	Arabidopsis thaliana	part of a light responsive element	Light responsiveness	Light responsiveness
Sh_So07H0284924.t1	ShAP2-52	TCT-motif	TCTTAC	1107	6	-	Arabidopsis thaliana	part of a light responsive element	Light responsiveness	Light responsiveness
Sh_So07H0284924.t1	ShAP2-52	TCT-motif	TCTTAC	1420	6	-	Arabidopsis thaliana	part of a light responsive element	Light responsiveness	Light responsiveness
Sh_So07H0284924.t1	ShAP2-52	TCT-motif	TCTTAC	2048	6	-	Arabidopsis thaliana	part of a light responsive element	Light responsiveness	Light responsiveness
Sh_So07H0284924.t1	ShAP2-52	TCT-motif	TCTTAC	2299	6	+	Arabidopsis thaliana	part of a light responsive element	Light responsiveness	Light responsiveness
Sh_So07H0284924.t1	ShAP2-52	chs-CMA1a	TTACTTAA	914	8	-	Daucus carota	part of a light responsive element	Light responsiveness	Light responsiveness
Sh_So07H0284924.t1	ShAP2-52	GATA-motif	AAGGATAAGG	2408	9	-	Solanum tuberosum	part of a light responsive element	Light responsiveness	Light responsiveness
Sh_So07H0284924.t1	ShAP2-52	G-Box	CACGTT	1395	6	+	Pisum sativum	cis-acting regulatory element involved in light responsiveness	Light responsiveness	Light responsiveness
Sh_So07H0284924.t1	ShAP2-52	TGACG-motif	TGACG	830	5	-	Hordeum vulgare	cis-acting regulatory element involved in the MeJA-responsiveness	MeJA responsiveness	Hormone responsiveness
Sh_So07H0284924.t1	ShAP2-52	TGACG-motif	TGACG	1897	5	+	Hordeum vulgare	cis-acting regulatory element involved in the MeJA-responsiveness	MeJA responsiveness	Hormone responsiveness
Sh_So07H0284924.t1	ShAP2-52	TGACG-motif	TGACG	2190	5	+	Hordeum vulgare	cis-acting regulatory element involved in the MeJA-responsiveness	MeJA responsiveness	Hormone responsiveness
Sh_So07H0284924.t1	ShAP2-52	ABRE	GCCGCGTGGC	17	9	-	Oryza sativa	cis-acting element involved in the abscisic acid responsiveness	abscisic acid responsiveness	Hormone responsiveness
Sh_So07H0284924.t1	ShAP2-52	ABRE	TACGGTC	1191	7	-	Arabidopsis thaliana	cis-acting element involved in the abscisic acid responsiveness	abscisic acid responsiveness	Hormone responsiveness
Sh_So07H0284924.t1	ShAP2-52	ABRE	AACCCGG	1356	7	-	Arabidopsis thaliana	cis-acting element involved in the abscisic acid responsiveness	abscisic acid responsiveness	Hormone responsiveness
Sh_So07H0284924.t1	ShAP2-52	ABRE	ACGTG	1395	5	-	Arabidopsis thaliana	cis-acting element involved in the abscisic acid responsiveness	abscisic acid responsiveness	Hormone responsiveness
Sh_So07H0284924.t1	ShAP2-52	TCA	TCATCTTCAT	2189	9	-	Pisum sativum		SA responsiveness	Hormone responsiveness
Sh_So07H0284924.t1	ShAP2-52	TATC-box	TATCCCA	2383	7	+	Oryza sativa	cis-acting element involved in gibberellin-responsiveness	GA responsiveness	Hormone responsiveness
Sh_So07H0284924.t1	ShAP2-52	F-box	CTATTCTCATT	95	10	-	Lycopersicon esculentum		GA responsiveness	Hormone responsiveness
Sh_So07H0284924.t1	ShAP2-52	CGTCA-motif	CGTCA	830	5	+	Hordeum vulgare	cis-acting regulatory element involved in the MeJA-responsiveness	MeJA responsiveness	Hormone responsiveness
Sh_So07H0284924.t1	ShAP2-52	CGTCA-motif	CGTCA	1897	5	-	Hordeum vulgare	cis-acting regulatory element involved in the MeJA-responsiveness	MeJA responsiveness	Hormone responsiveness
Sh_So07H0284924.t1	ShAP2-52	CGTCA-motif	CGTCA	2190	5	-	Hordeum vulgare	cis-acting regulatory element involved in the MeJA-responsiveness	MeJA responsiveness	Hormone responsiveness
Sh_So07H0284924.t1	ShAP2-52	AAGAA-motif	GAAAGAA	1568	7	+	Avena sativa		abscisic acid responsiveness	Hormone responsiveness
Sh_So07H0284924.t1	ShAP2-52	CGTCA-motif	CGTCA	1213	5	+	Hordeum vulgare	cis-acting regulatory element involved in the MeJA-responsiveness	MeJA responsiveness	Hormone responsiveness
Sh_So07H0284924.t1	ShAP2-52	TGACG-motif	TGACG	1213	5	-	Hordeum vulgare	cis-acting regulatory element involved in the MeJA-responsiveness	MeJA responsiveness	Hormone responsiveness
Sh_So07H0284924.t1	ShAP2-52	O2-site	GATGA(C/T)(A/G)TG(A/G)	656	8	-	Zea mays	cis-acting regulatory element involved in zein metabolism regulation	zein metabolism regulation	Development responsiveness
Sh_So07H0284924.t1	ShAP2-52	O2-site	GATGA(C/T)(A/G)TG(A/G)	1498	8	-	Zea mays	cis-acting regulatory element involved in zein metabolism regulation	zein metabolism regulation	Development responsiveness
Sh_So07H0284924.t1	ShAP2-52	WUN-motif	AAATTACT	187	8	+	Nicotiana glutinosa		Wound responsiveness	Stress responsiveness
Sh_So07H0284924.t1	ShAP2-52	STRE	AGGGG	48	5	+	Arabidopsis thaliana		Wound responsiveness	Stress responsiveness
Sh_So07H0284924.t1	ShAP2-52	STRE	AGGGG	1823	5	-	Arabidopsis thaliana		Wound responsiveness	Stress responsiveness
Sh_So07H0284924.t1	ShAP2-52	TC-rich repeats	GTTTTCTTAC	2295	9	+	Nicotiana tabacum	cis-acting element involved in defense and stress responsiveness	Defense and stress	Stress responsiveness
Sh_So07H0284924.t1	ShAP2-52	TC-rich repeats	ATTCTCTAAC	2363	9	+	Nicotiana tabacum	cis-acting element involved in defense and stress responsiveness	Defense and stress	Stress responsiveness
Sh_So07H0284924.t1	ShAP2-52	WRE3	CCACCT	53	6	-	Pisum sativum		Wound responsiveness	Stress responsiveness
Sh_So07H0284924.t1	ShAP2-52	WRE3	CCACCT	2206	6	-	Pisum sativum		Wound responsiveness	Stress responsiveness
Sh_So07H0284924.t1	ShAP2-52	WRE3	CCACCT	2260	6	-	Pisum sativum		Wound responsiveness	Stress responsiveness
Sh_So07H0284924.t1	ShAP2-52	LTR	CCGAAA	60	6	+	Hordeum vulgare	cis-acting element involved in low-temperature responsiveness	low-temperature	Stress responsiveness
Sh_So07H0284924.t1	ShAP2-52	ARE	AAACCA	648	6	+	Zea mays	cis-acting regulatory element essential for the anaerobic induction	anaerobic induction	Stress responsiveness
Sh_So07H0284924.t1	ShAP2-52	ARE	AAACCA	1122	6	-	Zea mays	cis-acting regulatory element essential for the anaerobic induction	anaerobic induction	Stress responsiveness
Sh_So07H0284924.t1	ShAP2-52	ARE	AAACCA	1402	6	-	Zea mays	cis-acting regulatory element essential for the anaerobic induction	anaerobic induction	Stress responsiveness
Sh_So07H0284924.t1	ShAP2-52	ARE	AAACCA	2026	6	-	Zea mays	cis-acting regulatory element essential for the anaerobic induction	anaerobic induction	Stress responsiveness
Sh_So07H0284924.t1	ShAP2-52	MYB recognition site	CCGTTG	1878	6	+	Arabidopsis thaliana		MYB	Transcription factor
Sh_So07H0284924.t1	ShAP2-52	MYC	CAATTG	942	6	+	Arabidopsis thaliana		MYC	Transcription factor
Sh_So07H0284924.t1	ShAP2-52	MYC	CATGTG	1459	6	+	Arabidopsis thaliana		MYC	Transcription factor
Sh_So07H0284924.t1	ShAP2-52	Myb	TAACTG	1183	6	-	Arabidopsis thaliana		MYB	Transcription factor
Sh_So07H0284924.t1	ShAP2-52	Myb	TAACTG	2273	6	-	Arabidopsis thaliana		MYB	Transcription factor
Sh_So07H0284924.t1	ShAP2-52	CCAAT-box	CAACGG	1878	6	-	Hordeum vulgare	MYBHv1 binding site	MYB	Transcription factor
Sh_So07H0284924.t1	ShAP2-52	MYB	TAACCA	1463	6	-	Arabidopsis thaliana		MYB	Transcription factor
Sh_So07H0284924.t1	ShAP2-52	MYB	TAACCA	1634	6	-	Arabidopsis thaliana		MYB	Transcription factor
Sh_So09B0312379.t1	ShAP2-56	AT1-motif	AATTATTTTTTATT	1637	13	-	Solanum tuberosum	part of a light responsive module	Light responsiveness	Light responsiveness
Sh_So09B0312379.t1	ShAP2-56	Box 4	ATTAAT	739	6	+	Petroselinum crispum	part of a conserved DNA module involved in light responsiveness	Light responsiveness	Light responsiveness
Sh_So09B0312379.t1	ShAP2-56	Box 4	ATTAAT	761	6	+	Petroselinum crispum	part of a conserved DNA module involved in light responsiveness	Light responsiveness	Light responsiveness
Sh_So09B0312379.t1	ShAP2-56	Box 4	ATTAAT	2479	6	-	Petroselinum crispum	part of a conserved DNA module involved in light responsiveness	Light responsiveness	Light responsiveness
Sh_So09B0312379.t1	ShAP2-56	ATCT-motif	AATCTAATCC	1560	9	-	Pisum sativum	part of a conserved DNA module involved in light responsiveness	Light responsiveness	Light responsiveness
Sh_So09B0312379.t1	ShAP2-56	AE-box	AGAAACAA	1226	8	-	Arabidopsis thaliana	part of a module for light response	Light responsiveness	Light responsiveness
Sh_So09B0312379.t1	ShAP2-56	I-box	gGATAAGGTG	2191	9	+	Zea mays	part of a light responsive element	Light responsiveness	Light responsiveness
Sh_So09B0312379.t1	ShAP2-56	G-box	TAACACGTAG	1154	9	+	Brassica oleracea	cis-acting regulatory element involved in light responsiveness	Light responsiveness	Light responsiveness
Sh_So09B0312379.t1	ShAP2-56	G-box	CACGAC	2208	6	-	Zea mays	cis-acting regulatory element involved in light responsiveness	Light responsiveness	Light responsiveness
Sh_So09B0312379.t1	ShAP2-56	Sp1	GGGCGG	275	6	+	Oryza sativa	light responsive element	Light responsiveness	Light responsiveness
Sh_So09B0312379.t1	ShAP2-56	Sp1	GGGCGG	2006	6	-	Oryza sativa	light responsive element	Light responsiveness	Light responsiveness
Sh_So09B0312379.t1	ShAP2-56	TCCC-motif	TCTCCCT	1360	7	-	Spinacia oleracea	part of a light responsive element	Light responsiveness	Light responsiveness
Sh_So09B0312379.t1	ShAP2-56	TCCC-motif	TCTCCCT	1995	7	+	Spinacia oleracea	part of a light responsive element	Light responsiveness	Light responsiveness
Sh_So09B0312379.t1	ShAP2-56	TCCC-motif	TCTCCCT	2117	7	+	Spinacia oleracea	part of a light responsive element	Light responsiveness	Light responsiveness
Sh_So09B0312379.t1	ShAP2-56	G-box	TACGTG	957	6	+	Arabidopsis thaliana	cis-acting regulatory element involved in light responsiveness	Light responsiveness	Light responsiveness
Sh_So09B0312379.t1	ShAP2-56	ERE	ATTTTAAA	573	8	+	Nicotiana glutinos		ETH responsiveness	Hormone responsiveness
Sh_So09B0312379.t1	ShAP2-56	TCA-element	CCATCTTTTT	1375	9	-	Nicotiana tabacum	cis-acting element involved in salicylic acid responsiveness	SA responsiveness	Hormone responsiveness
Sh_So09B0312379.t1	ShAP2-56	TGA-element	AACGAC	1620	6	-	Brassica oleracea	auxin-responsive element	Auxin responsiveness	Hormone responsiveness
Sh_So09B0312379.t1	ShAP2-56	ABRE4	CACGTA	957	6	-	Zea mays		abscisic acid responsiveness	Hormone responsiveness
Sh_So09B0312379.t1	ShAP2-56	ABRE	GCCGCGTGGC	199	9	-	Oryza sativa	cis-acting element involved in the abscisic acid responsiveness	abscisic acid responsiveness	Hormone responsiveness
Sh_So09B0312379.t1	ShAP2-56	ABRE	GCCGCGTGGC	228	10	-	Oryza sativa	cis-acting element involved in the abscisic acid responsiveness	abscisic acid responsiveness	Hormone responsiveness
Sh_So09B0312379.t1	ShAP2-56	ABRE	ACGTG	958	5	+	Arabidopsis thaliana	cis-acting element involved in the abscisic acid responsiveness	abscisic acid responsiveness	Hormone responsiveness
Sh_So09B0312379.t1	ShAP2-56	ABRE	TACGGTC	2218	7	-	Arabidopsis thaliana	cis-acting element involved in the abscisic acid responsiveness	abscisic acid responsiveness	Hormone responsiveness
Sh_So09B0312379.t1	ShAP2-56	ABRE	AACCCGG	2242	7	-	Arabidopsis thaliana	cis-acting element involved in the abscisic acid responsiveness	abscisic acid responsiveness	Hormone responsiveness
Sh_So09B0312379.t1	ShAP2-56	AAGAA-motif	gGTAAAGAAA	1686	9	+	Avena sativa		abscisic acid responsiveness	Hormone responsiveness
Sh_So09B0312379.t1	ShAP2-56	AAGAA-motif	GAAAGAA	1967	7	-	Avena sativa		abscisic acid responsiveness	Hormone responsiveness
Sh_So09B0312379.t1	ShAP2-56	ABRE3a	TACGTG	957	6	+	Zea mays		abscisic acid responsiveness	Hormone responsiveness
Sh_So09B0312379.t1	ShAP2-56	CCGTCC-box	CCGTCC	194	6	-	Petroselinum hortense		Meristem specific activation	Development responsiveness
Sh_So09B0312379.t1	ShAP2-56	CCGTCC-box	CCGTCC	2101	6	+	Petroselinum hortense		Meristem specific activation	Development responsiveness
Sh_So09B0312379.t1	ShAP2-56	CAT-box	GCCACT	345	6	-	Arabidopsis thaliana	cis-acting regulatory element related to meristem expression	Meristem specific activation	Development responsiveness
Sh_So09B0312379.t1	ShAP2-56	CAT-box	GCCACT	2226	6	-	Arabidopsis thaliana	cis-acting regulatory element related to meristem expression	Meristem specific activation	Development responsiveness
Sh_So09B0312379.t1	ShAP2-56	WRE3	CCACCT	49	6	-	Pisum sativum		Wound responsiveness	Stress responsiveness
Sh_So09B0312379.t1	ShAP2-56	WRE3	CCACCT	1366	6	-	Pisum sativum		Wound responsiveness	Stress responsiveness
Sh_So09B0312379.t1	ShAP2-56	WRE3	CCACCT	2011	6	+	Pisum sativum		Wound responsiveness	Stress responsiveness
Sh_So09B0312379.t1	ShAP2-56	STRE	AGGGG	114	5	+	Arabidopsis thaliana		Wound responsiveness	Stress responsiveness
Sh_So09B0312379.t1	ShAP2-56	STRE	AGGGG	128	5	+	Arabidopsis thaliana		Wound responsiveness	Stress responsiveness
Sh_So09B0312379.t1	ShAP2-56	STRE	AGGGG	292	5	+	Arabidopsis thaliana		Wound responsiveness	Stress responsiveness
Sh_So09B0312379.t1	ShAP2-56	STRE	AGGGG	547	5	+	Arabidopsis thaliana		Wound responsiveness	Stress responsiveness
Sh_So09B0312379.t1	ShAP2-56	LTR	CCGAAA	2066	6	+	Hordeum vulgare	cis-acting element involved in low-temperature responsiveness	low-temperature	Stress responsiveness
Sh_So09B0312379.t1	ShAP2-56	ARE	AAACCA	457	6	+	Zea mays	cis-acting regulatory element essential for the anaerobic induction	anaerobic induction	Stress responsiveness
Sh_So09B0312379.t1	ShAP2-56	MBS	CAACTG	2173	6	-	Arabidopsis thaliana	MYB binding site involved in drought-inducibility	MYB	Transcription factor
Sh_So09B0312379.t1	ShAP2-56	MBS	CAACTG	2429	6	-	Arabidopsis thaliana	MYB binding site involved in drought-inducibility	MYB	Transcription factor
Sh_So09B0312379.t1	ShAP2-56	MYB recognition site	CCGTTG	1144	6	-	Arabidopsis thaliana		MYB	Transcription factor
Sh_So09B0312379.t1	ShAP2-56	MYB	CAACCA	1254	6	-	Arabidopsis thaliana		MYB	Transcription factor
Sh_So09B0312379.t1	ShAP2-56	Myc	TCTCTTA	1263	7	+	Arabidopsis thaliana		MYC	Transcription factor
Sh_So09B0312379.t1	ShAP2-56	MYC	CATTTG	723	6	-	Arabidopsis thaliana		MYC	Transcription factor
Sh_So09B0312379.t1	ShAP2-56	MYC	CATGTG	803	6	-	Arabidopsis thaliana		MYC	Transcription factor
Sh_So09B0312379.t1	ShAP2-56	MYC	CATGTG	1524	6	-	Arabidopsis thaliana		MYC	Transcription factor
Sh_So09B0312379.t1	ShAP2-56	MYC	CATGTG	1812	6	-	Arabidopsis thaliana		MYC	Transcription factor
Sh_So09B0312379.t1	ShAP2-56	W box	TTGACC	2263	6	-	Arabidopsis thaliana		WRKY	Transcription factor
Sh_So09B0312379.t1	ShAP2-56	CCAAT-box	CAACGG	1144	6	+	Hordeum vulgare	MYBHv1 binding site	MYB	Transcription factor
Sh_So01A0034957.t1	ShAP2-57	GATA-motif	AAGGATAAGG	2390	9	+	Solanum tuberosum	part of a light responsive element	Light responsiveness	Light responsiveness
Sh_So01A0034957.t1	ShAP2-57	GA-motif	ATAGATAA	1949	8	+	Arabidopsis thaliana	part of a light responsive element	Light responsiveness	Light responsiveness
Sh_So01A0034957.t1	ShAP2-57	Box 4	ATTAAT	203	6	+	Petroselinum crispum	part of a conserved DNA module involved in light responsiveness	Light responsiveness	Light responsiveness
Sh_So01A0034957.t1	ShAP2-57	GT1-motif	GGTTAA	276	6	+	Arabidopsis thaliana	light responsive element	Light responsiveness	Light responsiveness
Sh_So01A0034957.t1	ShAP2-57	GT1-motif	GTGTGTGAA	2130	9	-	Solanum tuberosum	light responsive element	Light responsiveness	Light responsiveness
Sh_So01A0034957.t1	ShAP2-57	G-box	CACGTG	691	6	+	Arabidopsis thaliana	cis-acting regulatory element involved in light responsiveness	Light responsiveness	Light responsiveness
Sh_So01A0034957.t1	ShAP2-57	Sp1	GGGCGG	2479	6	+	Oryza sativa	light responsive element	Light responsiveness	Light responsiveness
Sh_So01A0034957.t1	ShAP2-57	AuxRR-core	GGTCCAT	1302	7	-	Nicotiana tabacum	cis-acting regulatory element involved in auxin responsiveness	Auxin responsiveness	Hormone responsiveness
Sh_So01A0034957.t1	ShAP2-57	CGTCA-motif	CGTCA	405	5	+	Hordeum vulgare	cis-acting regulatory element involved in the MeJA-responsiveness	MeJA responsiveness	Hormone responsiveness
Sh_So01A0034957.t1	ShAP2-57	CGTCA-motif	CGTCA	781	5	+	Hordeum vulgare	cis-acting regulatory element involved in the MeJA-responsiveness	MeJA responsiveness	Hormone responsiveness
Sh_So01A0034957.t1	ShAP2-57	CGTCA-motif	CGTCA	1540	5	-	Hordeum vulgare	cis-acting regulatory element involved in the MeJA-responsiveness	MeJA responsiveness	Hormone responsiveness
Sh_So01A0034957.t1	ShAP2-57	CGTCA-motif	CGTCA	1908	5	+	Hordeum vulgare	cis-acting regulatory element involved in the MeJA-responsiveness	MeJA responsiveness	Hormone responsiveness
Sh_So01A0034957.t1	ShAP2-57	CGTCA-motif	CGTCA	2257	5	+	Hordeum vulgare	cis-acting regulatory element involved in the MeJA-responsiveness	MeJA responsiveness	Hormone responsiveness
Sh_So01A0034957.t1	ShAP2-57	TGA-box	TGACGTAA	1213	8	+	Glycine max	part of an auxin-responsive element	Auxin responsiveness	Hormone responsiveness
Sh_So01A0034957.t1	ShAP2-57	P-box	CCTTTTG	973	7	-	Oryza sativa	gibberellin-responsive element	GA responsiveness	Hormone responsiveness
Sh_So01A0034957.t1	ShAP2-57	ABRE	ACGTG	692	5	+	Arabidopsis thaliana	cis-acting element involved in the abscisic acid responsiveness	abscisic acid responsiveness	Hormone responsiveness
Sh_So01A0034957.t1	ShAP2-57	TCA-element	CCATCTTTTT	1188	9	+	Nicotiana tabacum	cis-acting element involved in salicylic acid responsiveness	SA responsiveness	Hormone responsiveness
Sh_So01A0034957.t1	ShAP2-57	TGACG-motif	TGACG	405	5	-	Hordeum vulgare	cis-acting regulatory element involved in the MeJA-responsiveness	MeJA responsiveness	Hormone responsiveness
Sh_So01A0034957.t1	ShAP2-57	TGACG-motif	TGACG	781	5	-	Hordeum vulgare	cis-acting regulatory element involved in the MeJA-responsiveness	MeJA responsiveness	Hormone responsiveness
Sh_So01A0034957.t1	ShAP2-57	TGACG-motif	TGACG	1540	5	+	Hordeum vulgare	cis-acting regulatory element involved in the MeJA-responsiveness	MeJA responsiveness	Hormone responsiveness
Sh_So01A0034957.t1	ShAP2-57	TGACG-motif	TGACG	1908	5	-	Hordeum vulgare	cis-acting regulatory element involved in the MeJA-responsiveness	MeJA responsiveness	Hormone responsiveness
Sh_So01A0034957.t1	ShAP2-57	TGACG-motif	TGACG	2257	5	-	Hordeum vulgare	cis-acting regulatory element involved in the MeJA-responsiveness	MeJA responsiveness	Hormone responsiveness
Sh_So01A0034957.t1	ShAP2-57	ABRE	CACGTG	691	6	+	Arabidopsis thaliana	cis-acting element involved in the abscisic acid responsiveness	abscisic acid responsiveness	Hormone responsiveness
Sh_So01A0034957.t1	ShAP2-57	CGTCA-motif	CGTCA	1213	5	-	Hordeum vulgare	cis-acting regulatory element involved in the MeJA-responsiveness	MeJA responsiveness	Hormone responsiveness
Sh_So01A0034957.t1	ShAP2-57	AAGAA-motif	GAAAGAA	2369	7	+	Avena sativa		abscisic acid responsiveness	Hormone responsiveness
Sh_So01A0034957.t1	ShAP2-57	TCA-element	TCAGAAGAGG	2446	9	-	Brassica oleracea	cis-acting element involved in salicylic acid responsiveness	SA responsiveness	Hormone responsiveness
Sh_So01A0034957.t1	ShAP2-57	TCA	TCATCTTCAT	2401	9	+	Pisum sativum		SA responsiveness	Hormone responsiveness
Sh_So01A0034957.t1	ShAP2-57	TGACG-motif	TGACG	1213	5	+	Hordeum vulgare	cis-acting regulatory element involved in the MeJA-responsiveness	MeJA responsiveness	Hormone responsiveness
Sh_So01A0034957.t1	ShAP2-57	RY-element	CATGCATG	653	8	+	Helianthus annuus	cis-acting regulatory element involved in seed-specific regulation	seed-specific regulation	Development responsiveness
Sh_So01A0034957.t1	ShAP2-57	RY-element	CATGCATG	1930	8	-	Helianthus annuus	cis-acting regulatory element involved in seed-specific regulation	seed-specific regulation	Development responsiveness
Sh_So01A0034957.t1	ShAP2-57	RY-element	CATGCATG	26	8	+	Helianthus annuus	cis-acting regulatory element involved in seed-specific regulation	seed-specific regulation	Development responsiveness
Sh_So01A0034957.t1	ShAP2-57	LTR	CCGAAA	1284	6	+	Hordeum vulgare	cis-acting element involved in low-temperature responsiveness	low-temperature	Stress responsiveness
Sh_So01A0034957.t1	ShAP2-57	STRE	AGGGG	2436	5	-	Arabidopsis thaliana		Wound responsiveness	Stress responsiveness
Sh_So01A0034957.t1	ShAP2-57	STRE	AGGGG	1361	5	+	Arabidopsis thaliana		Wound responsiveness	Stress responsiveness
Sh_So01A0034957.t1	ShAP2-57	STRE	AGGGG	2110	5	+	Arabidopsis thaliana		Wound responsiveness	Stress responsiveness
Sh_So01A0034957.t1	ShAP2-57	WRE3	CCACCT	2214	6	+	Pisum sativum		Wound responsiveness	Stress responsiveness
Sh_So01A0034957.t1	ShAP2-57	GC-motif	CCCCCG	2487	6	-	Zea mays	enhancer-like element involved in anoxic specific inducibility	anaerobic induction	Stress responsiveness
Sh_So01A0034957.t1	ShAP2-57	DRE1	ACCGAGA	14	7	+	Zea mays		DRE	Transcription factor
Sh_So01A0034957.t1	ShAP2-57	MYC	CATTTG	1400	6	+	Arabidopsis thaliana		MYC	Transcription factor
Sh_So01A0034957.t1	ShAP2-57	MYC	CATTTG	1520	6	+	Arabidopsis thaliana		MYC	Transcription factor
Sh_So01A0034957.t1	ShAP2-57	MYC	CATTTG	1786	6	+	Arabidopsis thaliana		MYC	Transcription factor
Sh_So01A0034957.t1	ShAP2-57	DRE core	GCCGAC	1525	6	+	Arabidopsis thaliana		DRE	Transcription factor
Sh_So01A0034957.t1	ShAP2-57	MYB	TAACCA	275	6	-	Arabidopsis thaliana		MYB	Transcription factor
Sh_So01A0034957.t1	ShAP2-57	MYB	TAACCA	367	6	-	Arabidopsis thaliana		MYB	Transcription factor
Sh_So01A0034957.t1	ShAP2-57	MYB	TAACCA	9	6	-	Arabidopsis thaliana		MYB	Transcription factor
Sh_So01A0034078.t1	ShAP2-6	GT1-motif	GGTTAA	1817	6	-	Arabidopsis thaliana	light responsive element	Light responsiveness	Light responsiveness
Sh_So01A0034078.t1	ShAP2-6	GT1-motif	GGTTAA	1839	6	-	Arabidopsis thaliana	light responsive element	Light responsiveness	Light responsiveness
Sh_So01A0034078.t1	ShAP2-6	Box II	ACACGTTGT	1295	9	-	Sinapis alba	part of a light responsive element	Light responsiveness	Light responsiveness
Sh_So01A0034078.t1	ShAP2-6	chs-CMA1a	TTACTTAA	1396	8	+	Daucus carota	part of a light responsive element	Light responsiveness	Light responsiveness
Sh_So01A0034078.t1	ShAP2-6	chs-CMA1a	TTACTTAA	1431	8	+	Daucus carota	part of a light responsive element	Light responsiveness	Light responsiveness
Sh_So01A0034078.t1	ShAP2-6	G-Box	CACGTT	1297	6	-	Pisum sativum	cis-acting regulatory element involved in light responsiveness	Light responsiveness	Light responsiveness
Sh_So01A0034078.t1	ShAP2-6	AE-box	AGAAACAA	2374	8	-	Arabidopsis thaliana	part of a module for light response	Light responsiveness	Light responsiveness
Sh_So01A0034078.t1	ShAP2-6	Sp1	GGGCGG	2349	6	-	Oryza sativa	light responsive element	Light responsiveness	Light responsiveness
Sh_So01A0034078.t1	ShAP2-6	ABRE	ACGTG	1298	5	+	Arabidopsis thaliana	cis-acting element involved in the abscisic acid responsiveness	abscisic acid responsiveness	Hormone responsiveness
Sh_So01A0034078.t1	ShAP2-6	TCA-element	CCATCTTTTT	2257	9	+	Nicotiana tabacum	cis-acting element involved in salicylic acid responsiveness	SA responsiveness	Hormone responsiveness
Sh_So01A0034078.t1	ShAP2-6	F-box	CTATTCTCATT	43	10	+	Lycopersicon esculentum		GA responsiveness	Hormone responsiveness
Sh_So01A0034078.t1	ShAP2-6	ERE	ATTTTAAA	1354	8	+	Nicotiana glutinos		ETH responsiveness	Hormone responsiveness
Sh_So01A0034078.t1	ShAP2-6	ERE	ATTTTAAA	2042	8	+	Nicotiana glutinos		ETH responsiveness	Hormone responsiveness
Sh_So01A0034078.t1	ShAP2-6	WRE3	CCACCT	2298	6	+	Pisum sativum		Wound responsiveness	Stress responsiveness
Sh_So01A0034078.t1	ShAP2-6	STRE	AGGGG	1937	5	+	Arabidopsis thaliana		Wound responsiveness	Stress responsiveness
Sh_So01A0034078.t1	ShAP2-6	TC-rich repeats	GTTTTCTTAC	1444	9	-	Nicotiana tabacum	cis-acting element involved in defense and stress responsiveness	Defense and stress	Stress responsiveness
Sh_So01A0034078.t1	ShAP2-6	TC-rich repeats	ATTCTCTAAC	1790	9	+	Nicotiana tabacum	cis-acting element involved in defense and stress responsiveness	Defense and stress	Stress responsiveness
Sh_So01A0034078.t1	ShAP2-6	LTR	CCGAAA	1091	6	+	Hordeum vulgare	cis-acting element involved in low-temperature responsiveness	low-temperature	Stress responsiveness
Sh_So01A0034078.t1	ShAP2-6	LTR	CCGAAA	2051	6	+	Hordeum vulgare	cis-acting element involved in low-temperature responsiveness	low-temperature	Stress responsiveness
Sh_So01A0034078.t1	ShAP2-6	ARE	AAACCA	39	6	+	Zea mays	cis-acting regulatory element essential for the anaerobic induction	anaerobic induction	Stress responsiveness
Sh_So01A0034078.t1	ShAP2-6	ARE	AAACCA	174	6	+	Zea mays	cis-acting regulatory element essential for the anaerobic induction	anaerobic induction	Stress responsiveness
Sh_So01A0034078.t1	ShAP2-6	ARE	AAACCA	545	6	-	Zea mays	cis-acting regulatory element essential for the anaerobic induction	anaerobic induction	Stress responsiveness
Sh_So01A0034078.t1	ShAP2-6	GC-motif	CCCCCG	1666	6	+	Zea mays	enhancer-like element involved in anoxic specific inducibility	anaerobic induction	Stress responsiveness
Sh_So01A0034078.t1	ShAP2-6	GC-motif	CCCCCG	2157	6	+	Zea mays	enhancer-like element involved in anoxic specific inducibility	anaerobic induction	Stress responsiveness
Sh_So01A0034078.t1	ShAP2-6	GC-motif	CCCCCG	2309	6	+	Zea mays	enhancer-like element involved in anoxic specific inducibility	anaerobic induction	Stress responsiveness
Sh_So01A0034078.t1	ShAP2-6	MYB	CAACCA	493	6	-	Arabidopsis thaliana		MYB	Transcription factor
Sh_So01A0034078.t1	ShAP2-6	Myb	TAACTG	579	6	-	Arabidopsis thaliana		MYB	Transcription factor
Sh_So01A0034078.t1	ShAP2-6	Myb	TAACTG	1592	6	+	Arabidopsis thaliana		MYB	Transcription factor
Sh_So01A0034078.t1	ShAP2-6	Myb	TAACTG	1895	6	+	Arabidopsis thaliana		MYB	Transcription factor
Sh_So01A0034078.t1	ShAP2-6	MBS	CAACTG	1521	6	-	Arabidopsis thaliana	MYB binding site involved in drought-inducibility	MYB	Transcription factor
Sh_So01A0034078.t1	ShAP2-6	MBS	CAACTG	744	6	+	Arabidopsis thaliana	MYB binding site involved in drought-inducibility	MYB	Transcription factor
Sh_So01A0034078.t1	ShAP2-6	MYB	TAACCA	1818	6	+	Arabidopsis thaliana		MYB	Transcription factor
Sh_So01A0034078.t1	ShAP2-6	MYB	TAACCA	1840	6	+	Arabidopsis thaliana		MYB	Transcription factor
Sh_So10E0010081.t1	ShAP2-64	G-box	CACGTG	1309	6	-	Arabidopsis thaliana	cis-acting regulatory element involved in light responsiveness	Light responsiveness	Light responsiveness
Sh_So10E0010081.t1	ShAP2-64	ACE	GCGACGTACC	161	9	-	Petroselinum crispum	cis-acting element involved in light responsiveness	Light responsiveness	Light responsiveness
Sh_So10E0010081.t1	ShAP2-64	G-box	GCCACGTGGA	25	9	-	Arabidopsis thaliana	cis-acting regulatory element involved in light responsiveness	Light responsiveness	Light responsiveness
Sh_So10E0010081.t1	ShAP2-64	Box 4	ATTAAT	712	6	+	Petroselinum crispum	part of a conserved DNA module involved in light responsiveness	Light responsiveness	Light responsiveness
Sh_So10E0010081.t1	ShAP2-64	Box 4	ATTAAT	1212	6	+	Petroselinum crispum	part of a conserved DNA module involved in light responsiveness	Light responsiveness	Light responsiveness
Sh_So10E0010081.t1	ShAP2-64	Box 4	ATTAAT	1588	6	-	Petroselinum crispum	part of a conserved DNA module involved in light responsiveness	Light responsiveness	Light responsiveness
Sh_So10E0010081.t1	ShAP2-64	Box 4	ATTAAT	1791	6	-	Petroselinum crispum	part of a conserved DNA module involved in light responsiveness	Light responsiveness	Light responsiveness
Sh_So10E0010081.t1	ShAP2-64	TCCC-motif	TCTCCCT	193	7	-	Spinacia oleracea	part of a light responsive element	Light responsiveness	Light responsiveness
Sh_So10E0010081.t1	ShAP2-64	TCCC-motif	TCTCCCT	207	7	-	Spinacia oleracea	part of a light responsive element	Light responsiveness	Light responsiveness
Sh_So10E0010081.t1	ShAP2-64	TCCC-motif	TCTCCCT	255	7	-	Spinacia oleracea	part of a light responsive element	Light responsiveness	Light responsiveness
Sh_So10E0010081.t1	ShAP2-64	TCCC-motif	TCTCCCT	640	7	-	Spinacia oleracea	part of a light responsive element	Light responsiveness	Light responsiveness
Sh_So10E0010081.t1	ShAP2-64	G-box	TACGTG	1160	6	-	Arabidopsis thaliana	cis-acting regulatory element involved in light responsiveness	Light responsiveness	Light responsiveness
Sh_So10E0010081.t1	ShAP2-64	G-box	TACGTG	2410	6	-	Arabidopsis thaliana	cis-acting regulatory element involved in light responsiveness	Light responsiveness	Light responsiveness
Sh_So10E0010081.t1	ShAP2-64	TGA-element	AACGAC	2329	6	-	Brassica oleracea	auxin-responsive element	Auxin responsiveness	Hormone responsiveness
Sh_So10E0010081.t1	ShAP2-64	ABRE	CACGTG	1309	6	-	Arabidopsis thaliana	cis-acting element involved in the abscisic acid responsiveness	abscisic acid responsiveness	Hormone responsiveness
Sh_So10E0010081.t1	ShAP2-64	ABRE	ACGTG	1160	5	-	Arabidopsis thaliana	cis-acting element involved in the abscisic acid responsiveness	abscisic acid responsiveness	Hormone responsiveness
Sh_So10E0010081.t1	ShAP2-64	ABRE	ACGTG	1310	5	+	Arabidopsis thaliana	cis-acting element involved in the abscisic acid responsiveness	abscisic acid responsiveness	Hormone responsiveness
Sh_So10E0010081.t1	ShAP2-64	ABRE	ACGTG	2410	5	-	Arabidopsis thaliana	cis-acting element involved in the abscisic acid responsiveness	abscisic acid responsiveness	Hormone responsiveness
Sh_So10E0010081.t1	ShAP2-64	TGA-element	AACGAC	978	6	-	Brassica oleracea	auxin-responsive element	Auxin responsiveness	Hormone responsiveness
Sh_So10E0010081.t1	ShAP2-64	ABRE4	CACGTA	1160	6	+	Zea mays		abscisic acid responsiveness	Hormone responsiveness
Sh_So10E0010081.t1	ShAP2-64	ABRE4	CACGTA	2410	6	+	Zea mays		abscisic acid responsiveness	Hormone responsiveness
Sh_So10E0010081.t1	ShAP2-64	TCA	TCATCTTCAT	845	9	+	Pisum sativum		SA responsiveness	Hormone responsiveness
Sh_So10E0010081.t1	ShAP2-64	ERE	ATTTCATA	1555	8	-	Nicotiana glutinos		ETH responsiveness	Hormone responsiveness
Sh_So10E0010081.t1	ShAP2-64	GARE-motif	TCTGTTG	1767	7	+	Brassica oleracea	gibberellin-responsive element	GA responsiveness	Hormone responsiveness
Sh_So10E0010081.t1	ShAP2-64	ABRE3a	TACGTG	1160	6	-	Zea mays		abscisic acid responsiveness	Hormone responsiveness
Sh_So10E0010081.t1	ShAP2-64	ABRE3a	TACGTG	2410	6	-	Zea mays		abscisic acid responsiveness	Hormone responsiveness
Sh_So10E0010081.t1	ShAP2-64	CCGTCC-box	CCGTCC	1467	6	+	Petroselinum hortense		Meristem specific activation	Development responsiveness
Sh_So10E0010081.t1	ShAP2-64	CCGTCC-box	CCGTCC	1708	6	-	Petroselinum hortense		Meristem specific activation	Development responsiveness
Sh_So10E0010081.t1	ShAP2-64	CAT-box	GCCACT	2237	6	-	Arabidopsis thaliana	cis-acting regulatory element related to meristem expression	Meristem specific activation	Development responsiveness
Sh_So10E0010081.t1	ShAP2-64	WUN-motif	TTATTACAT	1277	9	-	Nicotiana glutinosa		Wound responsiveness	Stress responsiveness
Sh_So10E0010081.t1	ShAP2-64	STRE	AGGGG	44	5	+	Arabidopsis thaliana		Wound responsiveness	Stress responsiveness
Sh_So10E0010081.t1	ShAP2-64	STRE	AGGGG	134	5	+	Arabidopsis thaliana		Wound responsiveness	Stress responsiveness
Sh_So10E0010081.t1	ShAP2-64	STRE	AGGGG	945	5	+	Arabidopsis thaliana		Wound responsiveness	Stress responsiveness
Sh_So10E0010081.t1	ShAP2-64	STRE	AGGGG	1881	5	+	Arabidopsis thaliana		Wound responsiveness	Stress responsiveness
Sh_So10E0010081.t1	ShAP2-64	STRE	AGGGG	2296	5	+	Arabidopsis thaliana		Wound responsiveness	Stress responsiveness
Sh_So10E0010081.t1	ShAP2-64	STRE	AGGGG	2431	5	-	Arabidopsis thaliana		Wound responsiveness	Stress responsiveness
Sh_So10E0010081.t1	ShAP2-64	WRE3	CCACCT	93	6	+	Pisum sativum		Wound responsiveness	Stress responsiveness
Sh_So10E0010081.t1	ShAP2-64	ARE	AAACCA	466	6	-	Zea mays	cis-acting regulatory element essential for the anaerobic induction	anaerobic induction	Stress responsiveness
Sh_So10E0010081.t1	ShAP2-64	ARE	AAACCA	666	6	+	Zea mays	cis-acting regulatory element essential for the anaerobic induction	anaerobic induction	Stress responsiveness
Sh_So10E0010081.t1	ShAP2-64	GC-motif	CCCCCG	58	6	-	Zea mays	enhancer-like element involved in anoxic specific inducibility	anaerobic induction	Stress responsiveness
Sh_So10E0010081.t1	ShAP2-64	MYB	CAACAG	1768	6	-	Arabidopsis thaliana		MYB	Transcription factor
Sh_So10E0010081.t1	ShAP2-64	MYC	CATGTG	27	6	+	Arabidopsis thaliana		MYC	Transcription factor
Sh_So10E0010081.t1	ShAP2-64	MYC	CATGTG	321	6	-	Arabidopsis thaliana		MYC	Transcription factor
Sh_So10E0010081.t1	ShAP2-64	MYC	CATTTG	1804	6	+	Arabidopsis thaliana		MYC	Transcription factor
Sh_So10E0010081.t1	ShAP2-64	MYC	CATTTG	1943	6	+	Arabidopsis thaliana		MYC	Transcription factor
Sh_So10E0010081.t1	ShAP2-64	DRE	TACCGACAT	1937	9	+	Arabidopsis thaliana	cis-acting element involved in dehydration, low-temp, salt stresses	DRE	Transcription factor
Sh_So10E0010081.t1	ShAP2-64	DRE core	GCCGAC	179	6	+	Arabidopsis thaliana		DRE	Transcription factor
Sh_So10E0010081.t1	ShAP2-64	MYB recognition site	CCGTTG	406	6	+	Arabidopsis thaliana		MYB	Transcription factor
Sh_So10E0010081.t1	ShAP2-64	MYB recognition site	CCGTTG	681	6	+	Arabidopsis thaliana		MYB	Transcription factor
Sh_So10E0010081.t1	ShAP2-64	W box	TTGACC	905	6	-	Arabidopsis thaliana		WRKY	Transcription factor
Sh_So10E0010081.t1	ShAP2-64	W box	TTGACC	1011	6	-	Arabidopsis thaliana		WRKY	Transcription factor
Sh_So10E0010081.t1	ShAP2-64	W box	TTGACC	1653	6	-	Arabidopsis thaliana		WRKY	Transcription factor
Sh_So10E0010081.t1	ShAP2-64	CCAAT-box	CAACGG	406	6	-	Hordeum vulgare	MYBHv1 binding site	MYB	Transcription factor
Sh_So10E0010081.t1	ShAP2-64	CCAAT-box	CAACGG	681	6	-	Hordeum vulgare	MYBHv1 binding site	MYB	Transcription factor
Sh_So10E0010081.t1	ShAP2-64	DRE1	ACCGAGA	2307	7	+	Zea mays		DRE	Transcription factor
Sh_So10E0010081.t1	ShAP2-64	Myb	TAACTG	1230	6	-	Arabidopsis thaliana		MYB	Transcription factor
Sh_Ss10E0011678.t1	ShAP2-66	Sp1	GGGCGG	1795	6	-	Oryza sativa	light responsive element	Light responsiveness	Light responsiveness
Sh_Ss10E0011678.t1	ShAP2-66	Sp1	GGGCGG	1881	6	-	Oryza sativa	light responsive element	Light responsiveness	Light responsiveness
Sh_Ss10E0011678.t1	ShAP2-66	TCCC-motif	TCTCCCT	1964	7	+	Spinacia oleracea	part of a light responsive element	Light responsiveness	Light responsiveness
Sh_Ss10E0011678.t1	ShAP2-66	TCCC-motif	TCTCCCT	2323	7	+	Spinacia oleracea	part of a light responsive element	Light responsiveness	Light responsiveness
Sh_Ss10E0011678.t1	ShAP2-66	G-Box	CACGTT	1823	6	+	Pisum sativum	cis-acting regulatory element involved in light responsiveness	Light responsiveness	Light responsiveness
Sh_Ss10E0011678.t1	ShAP2-66	G-box	CACGTC	168	6	-	Zea mays	cis-acting regulatory element involved in light responsiveness	Light responsiveness	Light responsiveness
Sh_Ss10E0011678.t1	ShAP2-66	ACE	CTAACGTATT	1299	9	+	Petroselinum crispum	cis-acting element involved in light responsiveness	Light responsiveness	Light responsiveness
Sh_Ss10E0011678.t1	ShAP2-66	Box 4	ATTAAT	161	6	+	Petroselinum crispum	part of a conserved DNA module involved in light responsiveness	Light responsiveness	Light responsiveness
Sh_Ss10E0011678.t1	ShAP2-66	Box 4	ATTAAT	1270	6	-	Petroselinum crispum	part of a conserved DNA module involved in light responsiveness	Light responsiveness	Light responsiveness
Sh_Ss10E0011678.t1	ShAP2-66	ERE	ATTTTAAA	1288	8	+	Nicotiana glutinos		ETH responsiveness	Hormone responsiveness
Sh_Ss10E0011678.t1	ShAP2-66	ERE	ATTTTAAA	2039	8	+	Nicotiana glutinos		ETH responsiveness	Hormone responsiveness
Sh_Ss10E0011678.t1	ShAP2-66	CGTCA-motif	CGTCA	167	5	-	Hordeum vulgare	cis-acting regulatory element involved in the MeJA-responsiveness	MeJA responsiveness	Hormone responsiveness
Sh_Ss10E0011678.t1	ShAP2-66	CGTCA-motif	CGTCA	2467	5	+	Hordeum vulgare	cis-acting regulatory element involved in the MeJA-responsiveness	MeJA responsiveness	Hormone responsiveness
Sh_Ss10E0011678.t1	ShAP2-66	AAGAA-motif	GAAAGAA	926	7	+	Avena sativa		abscisic acid responsiveness	Hormone responsiveness
Sh_Ss10E0011678.t1	ShAP2-66	AAGAA-motif	GAAAGAA	1523	7	+	Avena sativa		abscisic acid responsiveness	Hormone responsiveness
Sh_Ss10E0011678.t1	ShAP2-66	TGACG-motif	TGACG	167	5	+	Hordeum vulgare	cis-acting regulatory element involved in the MeJA-responsiveness	MeJA responsiveness	Hormone responsiveness
Sh_Ss10E0011678.t1	ShAP2-66	TGACG-motif	TGACG	2467	5	-	Hordeum vulgare	cis-acting regulatory element involved in the MeJA-responsiveness	MeJA responsiveness	Hormone responsiveness
Sh_Ss10E0011678.t1	ShAP2-66	P-box	CCTTTTG	1072	7	-	Oryza sativa	gibberellin-responsive element	GA responsiveness	Hormone responsiveness
Sh_Ss10E0011678.t1	ShAP2-66	ABRE	ACGTG	169	5	+	Arabidopsis thaliana	cis-acting element involved in the abscisic acid responsiveness	abscisic acid responsiveness	Hormone responsiveness
Sh_Ss10E0011678.t1	ShAP2-66	ABRE	ACGTG	1823	5	-	Arabidopsis thaliana	cis-acting element involved in the abscisic acid responsiveness	abscisic acid responsiveness	Hormone responsiveness
Sh_Ss10E0011678.t1	ShAP2-66	RY-element	CATGCATG	2433	8	-	Helianthus annuus	cis-acting regulatory element involved in seed-specific regulation	seed-specific regulation	Development responsiveness
Sh_Ss10E0011678.t1	ShAP2-66	LTR	CCGAAA	874	6	-	Hordeum vulgare	cis-acting element involved in low-temperature responsiveness	low-temperature	Stress responsiveness
Sh_Ss10E0011678.t1	ShAP2-66	LTR	CCGAAA	1780	6	-	Hordeum vulgare	cis-acting element involved in low-temperature responsiveness	low-temperature	Stress responsiveness
Sh_Ss10E0011678.t1	ShAP2-66	WUN-motif	TAATTACTC	1931	9	+	Nicotiana glutinosa		Wound responsiveness	Stress responsiveness
Sh_Ss10E0011678.t1	ShAP2-66	STRE	AGGGG	466	5	-	Arabidopsis thaliana		Wound responsiveness	Stress responsiveness
Sh_Ss10E0011678.t1	ShAP2-66	STRE	AGGGG	1343	5	-	Arabidopsis thaliana		Wound responsiveness	Stress responsiveness
Sh_Ss10E0011678.t1	ShAP2-66	STRE	AGGGG	1884	5	-	Arabidopsis thaliana		Wound responsiveness	Stress responsiveness
Sh_Ss10E0011678.t1	ShAP2-66	WRE3	CCACCT	1120	6	-	Pisum sativum		Wound responsiveness	Stress responsiveness
Sh_Ss10E0011678.t1	ShAP2-66	WRE3	CCACCT	1390	6	+	Pisum sativum		Wound responsiveness	Stress responsiveness
Sh_Ss10E0011678.t1	ShAP2-66	GC-motif	CCCCCG	1760	6	-	Zea mays	enhancer-like element involved in anoxic specific inducibility	anaerobic induction	Stress responsiveness
Sh_Ss10E0011678.t1	ShAP2-66	ARE	AAACCA	115	6	+	Zea mays	cis-acting regulatory element essential for the anaerobic induction	anaerobic induction	Stress responsiveness
Sh_Ss10E0011678.t1	ShAP2-66	ARE	AAACCA	1049	6	-	Zea mays	cis-acting regulatory element essential for the anaerobic induction	anaerobic induction	Stress responsiveness
Sh_Ss10E0011678.t1	ShAP2-66	ARE	AAACCA	1296	6	+	Zea mays	cis-acting regulatory element essential for the anaerobic induction	anaerobic induction	Stress responsiveness
Sh_Ss10E0011678.t1	ShAP2-66	ARE	AAACCA	1873	6	+	Zea mays	cis-acting regulatory element essential for the anaerobic induction	anaerobic induction	Stress responsiveness
Sh_Ss10E0011678.t1	ShAP2-66	MBS	CAACTG	1104	6	-	Arabidopsis thaliana	MYB binding site involved in drought-inducibility	MYB	Transcription factor
Sh_Ss10E0011678.t1	ShAP2-66	MBS	CAACTG	1639	6	-	Arabidopsis thaliana	MYB binding site involved in drought-inducibility	MYB	Transcription factor
Sh_Ss10E0011678.t1	ShAP2-66	Myb	TAACTG	821	6	+	Arabidopsis thaliana		MYB	Transcription factor
Sh_Ss10E0011678.t1	ShAP2-66	W box	TTGACC	1784	6	-	Arabidopsis thaliana		WRKY	Transcription factor
Sh_Ss10E0011678.t1	ShAP2-66	W box	TTGACC	2241	6	-	Arabidopsis thaliana		WRKY	Transcription factor
Sh_Ss10E0011678.t1	ShAP2-66	CCAAT-box	CAACGG	1279	6	+	Hordeum vulgare	MYBHv1 binding site	MYB	Transcription factor
Sh_Ss10E0011678.t1	ShAP2-66	MYB recognition site	CCGTTG	1279	6	-	Arabidopsis thaliana		MYB	Transcription factor
Sh_Ss10E0011678.t1	ShAP2-66	MYC	CATTTG	36	6	-	Arabidopsis thaliana		MYC	Transcription factor
Sh_Ss10E0011678.t1	ShAP2-66	MYC	CATGTG	123	6	-	Arabidopsis thaliana		MYC	Transcription factor
Sh_Ss10E0011678.t1	ShAP2-66	MYC	CATGTG	488	6	+	Arabidopsis thaliana		MYC	Transcription factor
Sh_Ss10E0011678.t1	ShAP2-66	MYC	CATTTG	684	6	-	Arabidopsis thaliana		MYC	Transcription factor
Sh_Ss10E0011678.t1	ShAP2-66	MYC	CATTTG	833	6	-	Arabidopsis thaliana		MYC	Transcription factor
Sh_Ss10E0011678.t1	ShAP2-66	MYC	CATTTG	2023	6	-	Arabidopsis thaliana		MYC	Transcription factor
Sh_So05C0225325.t1	ShAP2-8	TCCC-motif	TCTCCCT	77	7	-	Spinacia oleracea	part of a light responsive element	Light responsiveness	Light responsiveness
Sh_So05C0225325.t1	ShAP2-8	TCCC-motif	TCTCCCT	1612	7	+	Spinacia oleracea	part of a light responsive element	Light responsiveness	Light responsiveness
Sh_So05C0225325.t1	ShAP2-8	Sp1	GGGCGG	2359	6	-	Oryza sativa	light responsive element	Light responsiveness	Light responsiveness
Sh_So05C0225325.t1	ShAP2-8	Sp1	GGGCGG	2363	6	-	Oryza sativa	light responsive element	Light responsiveness	Light responsiveness
Sh_So05C0225325.t1	ShAP2-8	Box 4	ATTAAT	1849	6	-	Petroselinum crispum	part of a conserved DNA module involved in light responsiveness	Light responsiveness	Light responsiveness
Sh_So05C0225325.t1	ShAP2-8	G-box	CACGAC	460	6	+	Zea mays	cis-acting regulatory element involved in light responsiveness	Light responsiveness	Light responsiveness
Sh_So05C0225325.t1	ShAP2-8	G-box	ACACGTG(G/t)CACC	730	10.5	+	Lycopersicon esculentum	cis-acting regulatory element involved in light responsiveness	Light responsiveness	Light responsiveness
Sh_So05C0225325.t1	ShAP2-8	G-box	CACGTG	1098	6	+	Arabidopsis thaliana	cis-acting regulatory element involved in light responsiveness	Light responsiveness	Light responsiveness
Sh_So05C0225325.t1	ShAP2-8	G-box	TACGTG	2194	6	-	Arabidopsis thaliana	cis-acting regulatory element involved in light responsiveness	Light responsiveness	Light responsiveness
Sh_So05C0225325.t1	ShAP2-8	CGTCA-motif	CGTCA	646	5	-	Hordeum vulgare	cis-acting regulatory element involved in the MeJA-responsiveness	MeJA responsiveness	Hormone responsiveness
Sh_So05C0225325.t1	ShAP2-8	GARE-motif	TCTGTTG	2323	7	-	Brassica oleracea	gibberellin-responsive element	GA responsiveness	Hormone responsiveness
Sh_So05C0225325.t1	ShAP2-8	TCA	TCATCTTCAT	427	9	-	Pisum sativum		SA responsiveness	Hormone responsiveness
Sh_So05C0225325.t1	ShAP2-8	TCA	TCATCTTCAT	1863	9	+	Pisum sativum		SA responsiveness	Hormone responsiveness
Sh_So05C0225325.t1	ShAP2-8	ABRE	CGCACGTGTC	1096	9	-	Hordeum vulgare	cis-acting element involved in the abscisic acid responsiveness	abscisic acid responsiveness	Hormone responsiveness
Sh_So05C0225325.t1	ShAP2-8	ABRE	ACGTG	1099	5	+	Arabidopsis thaliana	cis-acting element involved in the abscisic acid responsiveness	abscisic acid responsiveness	Hormone responsiveness
Sh_So05C0225325.t1	ShAP2-8	ABRE	ACGTG	2194	5	-	Arabidopsis thaliana	cis-acting element involved in the abscisic acid responsiveness	abscisic acid responsiveness	Hormone responsiveness
Sh_So05C0225325.t1	ShAP2-8	TGA-element	AACGAC	329	6	+	Brassica oleracea	auxin-responsive element	Auxin responsiveness	Hormone responsiveness
Sh_So05C0225325.t1	ShAP2-8	TGA-element	AACGAC	389	6	+	Brassica oleracea	auxin-responsive element	Auxin responsiveness	Hormone responsiveness
Sh_So05C0225325.t1	ShAP2-8	TGA-element	AACGAC	1674	6	-	Brassica oleracea	auxin-responsive element	Auxin responsiveness	Hormone responsiveness
Sh_So05C0225325.t1	ShAP2-8	ABRE4	CACGTA	2194	6	+	Zea mays		abscisic acid responsiveness	Hormone responsiveness
Sh_So05C0225325.t1	ShAP2-8	TGACG-motif	TGACG	646	5	+	Hordeum vulgare	cis-acting regulatory element involved in the MeJA-responsiveness	MeJA responsiveness	Hormone responsiveness
Sh_So05C0225325.t1	ShAP2-8	ABRE	CACGTG	1098	6	+	Arabidopsis thaliana	cis-acting element involved in the abscisic acid responsiveness	abscisic acid responsiveness	Hormone responsiveness
Sh_So05C0225325.t1	ShAP2-8	ABRE3a	TACGTG	2194	6	-	Zea mays		abscisic acid responsiveness	Hormone responsiveness
Sh_So05C0225325.t1	ShAP2-8	CCGTCC-box	CCGTCC	2152	6	+	Petroselinum hortense		Meristem specific activation	Development responsiveness
Sh_So05C0225325.t1	ShAP2-8	CCGTCC-box	CCGTCC	2274	6	+	Petroselinum hortense		Meristem specific activation	Development responsiveness
Sh_So05C0225325.t1	ShAP2-8	CCGTCC-box	CCGTCC	2290	6	-	Petroselinum hortense		Meristem specific activation	Development responsiveness
Sh_So05C0225325.t1	ShAP2-8	CCGTCC-box	CCGTCC	2294	6	-	Petroselinum hortense		Meristem specific activation	Development responsiveness
Sh_So05C0225325.t1	ShAP2-8	CCGTCC-box	CCGTCC	2482	6	-	Petroselinum hortense		Meristem specific activation	Development responsiveness
Sh_So05C0225325.t1	ShAP2-8	CCGTCC-box	CCGTCC	2487	6	-	Petroselinum hortense		Meristem specific activation	Development responsiveness
Sh_So05C0225325.t1	ShAP2-8	CAT-box	GCCACT	360	6	-	Arabidopsis thaliana	cis-acting regulatory element related to meristem expression	Meristem specific activation	Development responsiveness
Sh_So05C0225325.t1	ShAP2-8	CAT-box	GCCACT	727	6	+	Arabidopsis thaliana	cis-acting regulatory element related to meristem expression	Meristem specific activation	Development responsiveness
Sh_So05C0225325.t1	ShAP2-8	WRE3	CCACCT	2132	6	-	Pisum sativum		Wound responsiveness	Stress responsiveness
Sh_So05C0225325.t1	ShAP2-8	WRE3	CCACCT	2156	6	+	Pisum sativum		Wound responsiveness	Stress responsiveness
Sh_So05C0225325.t1	ShAP2-8	STRE	AGGGG	265	5	+	Arabidopsis thaliana		Wound responsiveness	Stress responsiveness
Sh_So05C0225325.t1	ShAP2-8	STRE	AGGGG	2443	5	-	Arabidopsis thaliana		Wound responsiveness	Stress responsiveness
Sh_So05C0225325.t1	ShAP2-8	GC-motif	CCCCCG	851	6	+	Zea mays	enhancer-like element involved in anoxic specific inducibility	anaerobic induction	Stress responsiveness
Sh_So05C0225325.t1	ShAP2-8	GC-motif	CCCCCG	2356	6	+	Zea mays	enhancer-like element involved in anoxic specific inducibility	anaerobic induction	Stress responsiveness
Sh_So05C0225325.t1	ShAP2-8	ARE	AAACCA	96	6	+	Zea mays	cis-acting regulatory element essential for the anaerobic induction	anaerobic induction	Stress responsiveness
Sh_So05C0225325.t1	ShAP2-8	ARE	AAACCA	1206	6	-	Zea mays	cis-acting regulatory element essential for the anaerobic induction	anaerobic induction	Stress responsiveness
Sh_So05C0225325.t1	ShAP2-8	MYB	CAACAG	2323	6	+	Arabidopsis thaliana		MYB	Transcription factor
Sh_So05C0225325.t1	ShAP2-8	MBS	CAACTG	2338	6	-	Arabidopsis thaliana	MYB binding site involved in drought-inducibility	MYB	Transcription factor
Sh_So05C0225325.t1	ShAP2-8	CCAAT-box	CAACGG	2264	6	+	Hordeum vulgare	MYBHv1 binding site	MYB	Transcription factor
Sh_So05C0225325.t1	ShAP2-8	MRE	AACCTAA	42	7	+	Petroselinum crispum	MYB binding site involved in light responsiveness	MYB	Transcription factor
Sh_So05C0225325.t1	ShAP2-8	MRE	AACCTAA	102	7	+	Petroselinum crispum	MYB binding site involved in light responsiveness	MYB	Transcription factor
Sh_So05C0225325.t1	ShAP2-8	MRE	AACCTAA	107	7	+	Petroselinum crispum	MYB binding site involved in light responsiveness	MYB	Transcription factor
Sh_So05C0225325.t1	ShAP2-8	Myb	TAACTG	111	6	+	Arabidopsis thaliana		MYB	Transcription factor
Sh_So05C0225325.t1	ShAP2-8	Myb	TAACTG	1192	6	+	Arabidopsis thaliana		MYB	Transcription factor
Sh_So05C0225325.t1	ShAP2-8	DRE1	ACCGAGA	190	7	+	Zea mays		DRE	Transcription factor
Sh_So05C0225325.t1	ShAP2-8	DRE1	ACCGAGA	2223	7	+	Zea mays		DRE	Transcription factor
Sh_So05C0225325.t1	ShAP2-8	MYC	CATTTG	762	6	-	Arabidopsis thaliana		MYC	Transcription factor
Sh_So05C0225325.t1	ShAP2-8	MYC	CATGTG	1886	6	+	Arabidopsis thaliana		MYC	Transcription factor
Sh_So05C0225325.t1	ShAP2-8	DRE core	GCCGAC	837	6	-	Arabidopsis thaliana		DRE	Transcription factor
Sh_So05C0225325.t1	ShAP2-8	MYB recognition site	CCGTTG	2264	6	-	Arabidopsis thaliana		MYB	Transcription factor
Sh_So05C0225325.t1	ShAP2-8	MYC	CATGTG	573	6	-	Arabidopsis thaliana		MYC	Transcription factor
