# Supplementary material for: Genomic and functional insights into the AP2 transcription factor family reveal a key orchestrator of drought adaptation in cultivated sugarcane
Source: Research Square preprint supplement (doi:10.21203/rs.3.rs-8306373/v1), 2025-12-26
Supplement: Supplementary file 5 [file e76cce56e75a49994bcfd085.xlsx]

## Sheet: Sheet1
Table S6. Primers used in this study
Gene ID	Forward primer sequence（5’-3’）	Reverse primer sequence（5’-3’）	Purpose
ShAP2-1	GCGTCACCTTTTACCGCC	GCACGAACTCCTCCTTGG	qPCR quantification of sugarcane genes
ShAP2-13	CAGGGACCACTCGATCGC	TCGGTACCGGCGTTCTTG
ShAP2-29	CCTCCGGTTATAGCGCGG	CGGTAGAAGGTGACGCCG
ShAP2-33	CTCTGCCTGCCTTGGGAC	CGCCTCCACCCTCTACCT
ShAP2-55	TGTTCTCGTCGTCGTCCG	GCGGTGATGATGGCTCGA
ShAP2-56	CACCACCAGGAGCAGCTC	ATCCTGATGTCCGGCTGC
ShAP2-59	GAACTGCCTAGCTGCCGA	GAACCGATGAGGGTGGCC
ShAP2-60	CTCCAACTCCCACCCTGC	GCGATGATGGCTCGACGA
GAPDH	CACGGCCACTGGAAGCA	TCCTCAGGGTTCCTGATGCC	Reference genes
Outer primer1	AACCGAAAAAGTTGCAACGCCCAGAGGG	Universal Primer Mix	RACE-PCR amplification of target genes
inner primer	TCAGCGGCGATGATGGCTCGACGAC	Nested Primer
hyg501	GAGCATATACGCCCGGAGTC	CAAGACCTGCCTGAAACCGA	Identification of transgenic plants
IDAP2-1	TTCATTTGGAGAGAACACGGGGGAC	CCTTGCAGCAGCATGAGC
