# Supplementary material for: Genomic and functional insights into the AP2 transcription factor family reveal a key orchestrator of drought adaptation in cultivated sugarcane
Source: Research Square preprint supplement (doi:10.21203/rs.3.rs-8306373/v1), 2025-12-26
Supplement: Supplementary file 6 [file f7a7ff3f83b8b03785270e5d.xlsx]

## Sheet: Sheet1
Table S2. Summary of motifs in ShAP2 family genes by MEME analysis
Motif	Length	E-value	Site sequence
Motif1	29	5.9E-502	TFDTZEEAARAYDIAAIKFRGLNAVTNFD
Motif2	21	2.0E-396	SQYRGVTRHRWTGRYEAHLWD
Motif3	21	3.2E-353	HKHGRWZARIGRVLGNKYLYL
Motif4	29	1.0E-388	YDLAALKYWGPSTTINFPLEDYEDELKEM
Motif5	24	4.9e-274	SLRRQSSGFSRGASKYRGVTR
Motif6	15	4.9e-94	GQTRKGRQGGYDKEE
Motif7	8	3.2e-57	NMTREEFV
Motif8	50	1.9e-53	ETEAVVDGDEVDLNLRISQPNVQDPKRDGTLTGLQLGCGSPEASESIVSQ
Motif9	26	8.2e-41	ISRYDVKSILASNTLIGGGAARRRKD
Motif10	20	8.1e-33	PPSVSPAAGKKSRRGPRSRS
